# Supplementary material for: An N-heterocyclic carbene iridium catalyst with metal-centered chirality for enantioselective transfer hydrogenation of imines
Source: Royal Society of Chemistry journal article supplement (doi:10.1039/c7cc04691j), 2017-01-01

Electronic Supplementary Material (ESI)  
This journal is © The Royal Society of Chemistry 2017

## Supporting Information

# An *N*-Heterocyclic Carbene Iridium Catalyst with Metal-Centered Chirality for Enantioselective Transfer Hydrogenation of Imines

YanJun Li,<sup>a</sup> Meng Lei,<sup>a</sup> Wei Yuan,<sup>a</sup> Eric Meggers<sup>a,b</sup> and Lei Gong<sup>\*a</sup>

<sup>a</sup>College of Chemistry and Chemical Engineering, Xiamen University, Xiamen 361005, People's Republic of China

<sup>b</sup>Fachbereich Chemie, Philipps-Universität Marburg, Hans-Meerwein-Strasse 4, 35043 Marburg, Germany

Email: gongl@xmu.edu.cn

## Contents

|                                                                                                           |    |
|-----------------------------------------------------------------------------------------------------------|----|
| 1. General Information                                                                                    | 2  |
| 2. Synthesis of the Iridium Catalysts                                                                     | 3  |
| 2.1 Synthesis of the NHC Precursors <b>L1a</b> and <b>L1b</b>                                             | 3  |
| 2.2 Synthesis of the Racemic Iridium NHC Catalysts <i>Rac-IrC1a</i> and <i>Rac-IrC1b</i>                  | 4  |
| 2.3 Synthesis of the Nonracemic Iridium NHC Catalysts $\Delta$ - <b>IrC1a</b> and $\Delta$ - <b>IrC1b</b> | 6  |
| 2.4 Synthesis of the Bis-ammonia Complex $\Delta$ - <b>6</b>                                              | 8  |
| 2.5 CD Spectra of the Nonracemic Iridium Complexes                                                        | 9  |
| 3. Synthesis of the Substrates and Racemic Products                                                       | 11 |
| 3.1 Synthesis of the Substrates                                                                           | 11 |
| 3.2 Synthesis of the Racemic Reference Products                                                           | 14 |
| 4. ATH of Cyclic <i>N</i> -Sulfonylimines by the Iridium Catalysts                                        | 15 |
| 4.1 Optimization of the Reaction Conditions                                                               | 15 |
| 4.2 Substrate Scope                                                                                       | 16 |
| 5. Synthetic Utility of the Method                                                                        | 26 |
| 5.1 Conversion to the Chiral Diarylmethylamine <b>8</b>                                                   | 26 |
| 5.2 Half-a-Gram Synthesis of the Bioactive Sultam <b>9</b>                                                | 27 |
| 6. Chiral Chromatography                                                                                  | 28 |
| 6.1 Determination of Enantiopurities of the Iridium NHC Catalysts                                         | 28 |
| 6.2 Determination of Enantioselectivities of the ATH of Cyclic <i>N</i> -Sulfonylimines                   | 30 |
| 6.3 Determination of Enantiopurities of the Transformation Products                                       | 54 |
| 7. X-Ray Diffraction of <i>Rac-IrC1a</i>                                                                  | 58 |
| 8. References                                                                                             | 60 |
| 9. <sup>1</sup> H and <sup>13</sup> C NMR Spectrum                                                        | 61 |

## 1. General Information

Synthesis of the iridium complexes were carried out under an atmosphere of argon with magnetic stirring. Catalytic reactions were performed in air. Solvents were distilled under argon from calcium hydride (CH<sub>3</sub>CN and CH<sub>2</sub>Cl<sub>2</sub>) or sodium/benzophenone (THF). Iridium complexes  $\Delta$ -IrO,  $\Delta$ -IrS,<sup>1</sup> *N*-sulfonylamides **S1a-b**,<sup>2</sup> **S1d-i**,<sup>3</sup> and *N*-sulfonylimine substrates **4a-b**,<sup>4</sup> **4l-x**.<sup>5,6</sup> were prepared according to published procedures. All other reagents were purchased from commercial suppliers (TCI, Adamas-beta®, Alfa and J&K) and used without further purification. Column chromatography was performed with silica gel from Huanghai Chemical Reagent (300–400 mesh). <sup>1</sup>H NMR and <sup>13</sup>C NMR spectra were recorded on a Bruker AM (500 or 600 MHz) spectrometer at ambient temperature. NMR standards were used as follows: (<sup>1</sup>H NMR) CDCl<sub>3</sub> = 7.26 ppm, (<sup>1</sup>H NMR) CD<sub>2</sub>Cl<sub>2</sub> = 5.32 ppm; (<sup>13</sup>C NMR) CDCl<sub>3</sub> = 77.1 ppm, (<sup>13</sup>C NMR) CD<sub>2</sub>Cl<sub>2</sub> = 53.8 ppm. IR spectra were recorded on a Nicolet Avatar 330 FT-IR spectrophotometer. Chiral HPLC chromatograms were obtained from an Agilent 1260 Series HPLC system. CD spectra were recorded on a JASCO J-810 CD spectropolarimeter (600–200 nm, 1 nm band width, 50 nm/min scanning speed). High-resolution mass spectra were recorded on a Bruker En Apex Ultra 7.0T FT-MS instrument using ESI technique. Optical rotations were measured on an Anton Paar MCP 500 polarimeter at concentrations of 1.0 g/100 mL or 0.2 g/100 mL. Enantiomeric excess (ee) values of the products were determined by HPLC on chiral phase.

## 2. Synthesis of the Iridium Catalysts

### 2.1 Synthesis of the NHC Precursors L1a and L1b

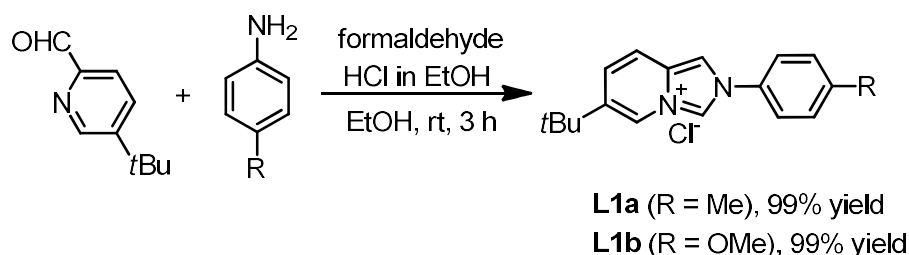

**Scheme S1.** Synthetic route to the NHC precursors.

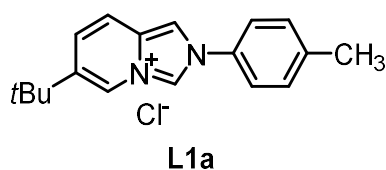

A solution of 5-(*tert*-butyl)picolinaldehyde (770 mg, 4.72 mmol), *p*-toluidine (506 mg, 4.72 mmol), formaldehyde (37% solution in water, 530  $\mu$ L, 7.13 mmol), and HCl (2.0 M in EtOH, 2.36 mL, 4.72 mmol) in EtOH (8 mL) was stirred at room temperature for 3 h. The reaction mixture was concentrated and dried in *vacuo* to afford **L1a** as a white solid (1.41 g, 4.69 mmol, 99% yield).

$^1\text{H}$  NMR (500 MHz,  $\text{CDCl}_3$ ):  $\delta$  (ppm) 12.13 (s, 1H), 9.32 (s, 1H), 7.76 (s, 1H), 7.70 (d,  $J = 8.4$  Hz, 2H), 7.55 (d,  $J = 9.8$  Hz, 1H), 7.40 (d,  $J = 8.1$  Hz, 2H), 7.34 (d,  $J = 9.7$  Hz, 1H), 2.45 (s, 3H), 1.39 (s, 9H).

$^{13}\text{C}$  NMR (126 MHz,  $\text{CDCl}_3$ ):  $\delta$  (ppm) 141.4, 141.0, 132.6, 131.38, 131.35, 129.4, 127.0, 122.2, 120.9, 116.2, 108.9, 34.4, 29.9, 21.3.

IR(film):  $\nu$  ( $\text{cm}^{-1}$ ) 3053, 2963, 2870, 1723, 1659, 1596, 1550, 1515, 1438, 1273, 1122, 1019, 820, 732, 543.

HRMS (ESI,  $m/z$ ) calcd for  $\text{C}_{18}\text{H}_{21}\text{N}_2$  ( $\text{M}-\text{Cl}$ ) $^+$ : 265.1699, found: 265.1695.

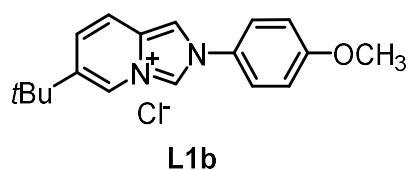

A solution of 5-(*tert*-butyl)picolinaldehyde (676 mg, 4.14 mmol), *p*-anisidine (510 mg, 4.14 mmol), formaldehyde (37% solution in water, 465  $\mu$ L, 6.25 mmol), and HCl (2.0 M in EtOH, 2.07 mL, 4.14 mmol) in EtOH (6 mL) was stirred at room temperature for 3 h. The reaction mixture was then concentrated and dried in *vacuo* to afford **L1b** as a white solid (1.30g, 4.10 mmol, 99% yield).

$^1\text{H}$  NMR (500 MHz,  $\text{CDCl}_3$ ):  $\delta$  (ppm) 11.90 (d,  $J = 1.1$  Hz, 1H), 9.15 (s, 1H), 7.87 (s, 1H), 7.78 (d,  $J = 9.0$  Hz, 2H), 7.57 (d,  $J = 9.8$  Hz, 1H), 7.30 (dd,  $J = 9.8, 1.3$  Hz, 1H), 7.06 (d,  $J = 9.0$  Hz, 2H), 3.85 (s, 3H), 1.37 (s, 9H).

$^{13}\text{C}$  NMR (126 MHz,  $\text{CDCl}_3$ ):  $\delta$  (ppm) 161.2, 141.0, 129.3, 127.8, 126.7, 123.8, 120.45, 120.4, 116.4, 115.8, 109.4, 55.9, 34.3, 29.9.

IR(film):  $\nu$  ( $\text{cm}^{-1}$ ) 3364, 3063, 2958, 2919, 2255, 1659, 1634, 1536, 1518, 1459, 1400, 1294, 1261, 1028, 841, 832, 819, 622, 528, 441.

HRMS (ESI,  $m/z$ ) calcd for  $\text{C}_{18}\text{H}_{21}\text{N}_2\text{O}$  ( $\text{M}-\text{Cl}$ ) $^+$ : 281.1648, found: 281.1649.

## 2.2 Synthesis of the Racemic Iridium NHC Catalysts *Rac-IrC1a* and *Rac-IrC1b*

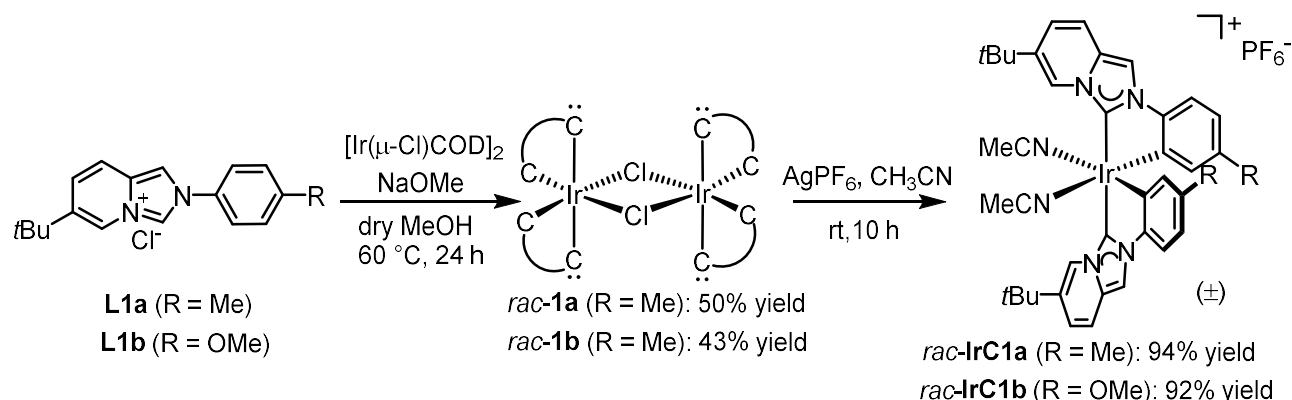

**Scheme S2.** Synthetic route to the racemic iridium NHC catalysts *rac-IrC1a* and *rac-IrC1b*.

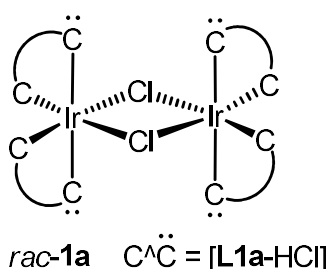

A mixture of  $[\text{Ir}(\mu\text{-Cl})(\text{COD})]_2$  (403 mg, 0.60 mmol) and NaOMe (270 mg, 5.00 mmol) in MeOH (20 mL) was stirred for 0.5 h at 60 °C under an argon atmosphere. The solution turned from orange to pale yellow, into which NHC precursor **L1a** (602 mg, 2.00 mmol) was added. After stirring at 60 °C for 24 h, the reaction mixture was concentrated in *vacuo*. The residue was subjected to flash chromatography on silica gel ( $\text{CH}_2\text{Cl}_2/n\text{-hexane} = 1:2$ ) to afford *rac-1a* as a yellow solid (377 mg, 0.25 mmol, 50% yield).

<sup>1</sup>H NMR (500 MHz, CDCl<sub>3</sub>): δ (ppm) 9.13 (s, 4H), 7.57 (s, 4H), 7.07 (d,  $J = 9.3, 4.6$  Hz, 4H), 6.91 (d,  $J = 7.8$  Hz, 4H), 6.73 (dd,  $J = 9.8, 1.4$  Hz, 4H), 6.44 (dd,  $J = 7.8, 1.0$  Hz, 4H), 5.58 (d,  $J = 1.4$  Hz, 4H), 1.80 (s, 12H), 1.02 (s, 36H).

<sup>13</sup>C NMR (126 MHz, CDCl<sub>3</sub>): δ (ppm) 167.4, 144.4, 138.0, 134.1, 134.2, 131.7, 129.6, 122.0, 121.9, 121.3, 116.1, 111.2, 104.2, 33.3, 30.0, 21.2.

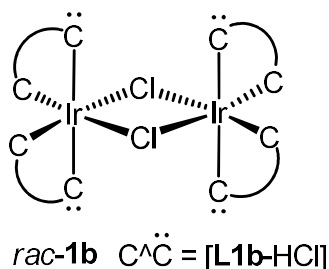

A mixture of  $[\text{Ir}(\mu\text{-Cl})(\text{COD})]_2$  (826 mg, 1.23 mmol) and NaOMe (443 mg, 8.20 mmol) in MeOH (40 mL) was stirred for 0.5 h at 60 °C under an argon atmosphere. The solution turned from orange to pale yellow, into which NHC precursor **L1b** (1300 mg, 4.10 mmol) was added. After stirring at 60 °C for 24 h, the reaction mixture was concentrated in *vacuo*. The residue was subjected to flash chromatography on silica gel ( $\text{CH}_2\text{Cl}_2/n\text{-hexane} = 1:2$ ) to afford *rac-1b* as a yellow solid (693 mg, 0.44 mmol, 43% yield).

<sup>1</sup>H NMR (500 MHz, CDCl<sub>3</sub>): δ (ppm) (s, 4H), 7.55 (d,  $J = 11.3$  Hz, 4H), 7.07 (dd,  $J = 10.2, 0.7$  Hz, 4H), 6.95 (d,  $J = 8.5$  Hz, 4H), 6.72 (dd,  $J = 9.8, 1.4$  Hz, 4H), 6.25 (dd, 4H), 5.28 (d,  $J = 2.6$  Hz, 4H), 3.18 (s, 12H), 1.01 (s, 36H).

$^{13}\text{C}$  NMR (126 MHz,  $\text{CDCl}_3$ ):  $\delta$  (ppm) 165.8, 156.8, 140.3, 134.3, 133.1, 129.6, 122.1, 121.9, 120.7, 116.1, 112.1, 107.1, 104.3, 54.6, 33.3, 29.9.

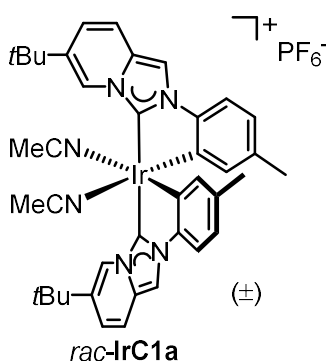

To a solution of dimeric complex *rac-1a* (340 mg, 0.23 mmol) in  $\text{CH}_3\text{CN}$  (20 mL) was added  $\text{AgPF}_6$  (142 mg, 0.56 mmol). The mixture was stirred at room temperature for 10 h, then evaporated to dryness. The residue was subjected to column chromatograph on silica gel ( $\text{CH}_2\text{Cl}_2$  to  $\text{CH}_2\text{Cl}_2/\text{CH}_3\text{CN} = 30:1$ ) to afford *rac-IrC1a* as a pale brown solid (428 mg, 0.43 mmol, 94% yield).

$^1\text{H}$  NMR (500 MHz,  $\text{CDCl}_3$ ):  $\delta$  (ppm) 8.38 (s, 2H), 7.76 (s, 2H), 7.42 (d,  $J = 9.8$  Hz, 2H), 7.13–7.05 (m, 4H), 6.66 (d,  $J = 7.1$  Hz, 2H), 5.75 (s, 2H), 2.35 (s, 6H), 1.95 (s, 6H), 1.38 (s, 18H).

$^{13}\text{C}$  NMR (126 MHz,  $\text{CDCl}_3$ ):  $\delta$  (ppm) 159.5, 144.3, 138.3, 137.0, 135.6, 129.9, 128.6, 123.20, 123.21, 120.5, 125.6, 117.5, 112.1, 104.6, 33.6, 29.9, 21.3, 3.9.

IR (film):  $\nu$  ( $\text{cm}^{-1}$ ) 3156, 2961, 2872, 1651, 1587, 1475, 1404, 1369, 1331, 1263, 1095, 845, 802, 738, 675.

HRMS (ESI,  $m/z$ ) calcd for  $\text{C}_{40}\text{H}_{44}\text{IrN}_6$  ( $\text{M-PF}_6$ )<sup>+</sup>: 801.3251, found: 801.3258.

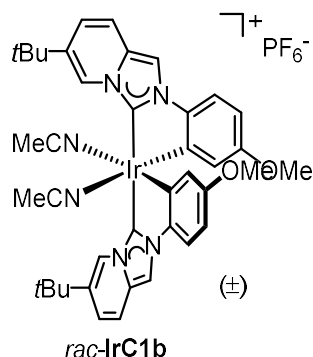

To a solution of *rac-1b* (400 mg, 0.25 mmol) in  $\text{CH}_3\text{CN}$  (15 mL) was added  $\text{AgPF}_6$  (158 mg, 0.62 mmol). The mixture was stirred at room temperature for 10 h, then evaporated to dryness. The residue was subjected to column chromatograph on silica gel ( $\text{CH}_2\text{Cl}_2$  to  $\text{CH}_2\text{Cl}_2/\text{CH}_3\text{CN} = 30:1$ ) to afford *rac-IrC1b* as a pale brown solid (470 mg, 0.46 mmol, 92% yield).

$^1\text{H}$  NMR (500 MHz,  $\text{CDCl}_3$ ):  $\delta$  (ppm) 8.38 (s, 2H), 7.71 (s, 2H), 7.38 (d,  $J = 9.1$  Hz, 2H), 7.13 (d,  $J = 8.6$  Hz, 2H), 7.05 (dd,  $J = 9.8, 1.2$  Hz, 2H), 6.40 (dd,  $J = 8.5, 2.7$  Hz, 2H), 5.53 (d,  $J = 2.6$  Hz, 2H), 3.45 (s, 6H), 2.37 (s, 6H), 1.38 (s, 18H).

$^{13}\text{C}$  NMR (126 MHz,  $\text{CDCl}_3$ ):  $\delta$  (ppm) 165.8, 156.8, 140.3, 134.3, 133.0, 129.6, 122.1, 121.8, 120.6, 116.1, 112.1, 107.1, 104.2, 100.1, 54.6, 33.30, 29.9, 3.8.

IR (film):  $\nu$  ( $\text{cm}^{-1}$ ) 3140, 2959, 2926, 1657, 1572, 1466, 1435, 1369, 1267, 1043, 845, 802, 558, 457.

HRMS (ESI,  $m/z$ ) calcd for  $\text{C}_{40}\text{H}_{44}\text{IrN}_6\text{O}_2$  ( $\text{M-PF}_6$ )<sup>+</sup>: 833.3150, found: 833.3150.

## 2.3 Synthesis of the Nonracemic Iridium NHC Catalysts $\Delta$ -IrC1a and $\Delta$ -IrC1b

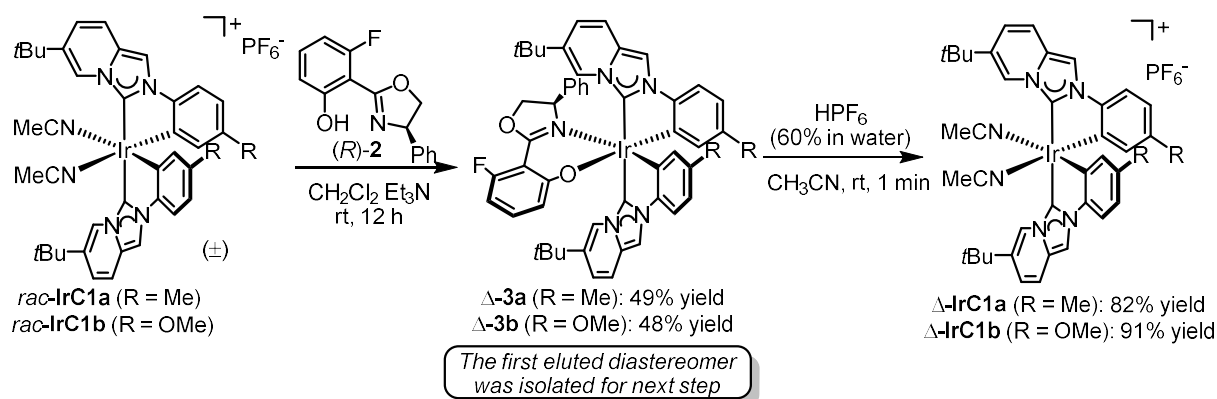

**Scheme S3.** Synthetic route to the nonracemic iridium NHC catalysts  $\Delta$ -IrC1a and  $\Delta$ -IrC1b.

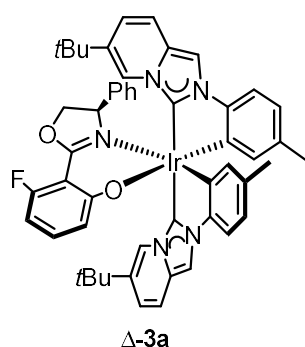

A solution of *rac*-IrC1a (220 mg, 0.22 mmol),  $\text{Et}_3\text{N}$  (224 mg, 2.20 mmol) and (*R*)-2 (72.0 mg, 0.26 mmol) in  $\text{CH}_2\text{Cl}_2$  (5 mL) was stirred for 12 h at room temperature, then evaporated to dryness. The produced two diastereomers were separated by preparative TLC ( $\text{CH}_2\text{Cl}_2/n$ -hexane = 5:2). The less polar fraction was collected as a yellow solid and identified to be  $\Delta$ -3a (105 mg, 0.108 mmol, 49% yield), which was used for further synthesis of the nonracemic catalyst  $\Delta$ -IrC1a.

$^1\text{H}$  NMR (500 MHz,  $\text{CD}_2\text{Cl}_2$ ):  $\delta$  (ppm) 8.71 (s, 1H), 8.11 (s, 1H), 7.65 (s, 1H), 7.28 (d,  $J = 9.8$  Hz, 1H), 7.06 (d,  $J = 2.7$  Hz, 2H), 7.04 (d,  $J = 1.9$  Hz, 1H), 6.96–6.84 (m, 5H), 6.61 (dd,  $J = 17.4, 7.7$  Hz, 6H), 6.30 (d,  $J = 8.7$  Hz, 1H), 6.21 (s, 1H), 5.94 (dd,  $J = 12.1, 7.9$  Hz, 1H), 5.45 (s, 1H), 4.67 (t,  $J = 9.0$  Hz, 1H), 4.62 (dd,  $J = 9.4, 3.5$  Hz, 1H), 4.04 (dd,  $J = 8.4, 3.5$  Hz, 1H), 2.04 (s, 3H), 1.92 (s, 3H), 1.40 (s, 9H), 1.28 (s, 9H).

$^{13}\text{C}$  NMR (126 MHz,  $\text{CD}_2\text{Cl}_2$ ):  $\delta$  (ppm) 176.4 (d,  $J = 3.4$  Hz), 168.2, 164.95, 164.3, 162.2, 161.6 (d,  $J = 2.6$  Hz), 145.9, 145.5, 140.7, 139.8, 139.0, 138.3, 136.1, 135.1 (d,  $J = 8.8$  Hz), 134.8, 132.8, 132.7, 131.0, 129.6, 129.4, 128.2, 127.0, 122.1 (d,  $J = 2.3$  Hz), 121.9, 121.7, 121.1, 120.3, 119.7 (d,  $J = 2.5$  Hz), 117.8, 117.0, 112.3, 112.0, 104.9, 103.9, 102.6 (d,  $J = 7.4$  Hz), 99.4, 99.2, 75.4, 70.0, 33.7, 33.5, 30.1, 29.9, 21.4, 21.3.

IR (film):  $\nu$  ( $\text{cm}^{-1}$ ) 3028, 2963, 2918, 2867, 1620, 1599, 1530, 1468, 1447, 1368, 1261, 1221, 1098, 1036, 794, 696, 615, 531.

HRMS (ESI,  $m/z$ ) calcd for  $\text{C}_{51}\text{H}_{49}\text{FIrN}_5\text{NaO}_2$  ( $\text{M}+\text{Na}$ ) $^+$ : 998.3392, found: 998.3394.

CD ( $\text{CH}_2\text{Cl}_2$ ):  $\lambda$ , nm ( $\Delta\epsilon$ ,  $\text{M}^{-1}\text{cm}^{-1}$ ) 276 (+8), 256 (-3), 242 (+16), 218 (-29).

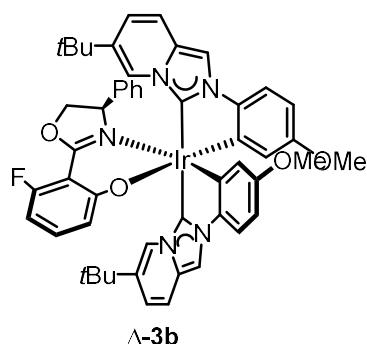

A solution of *rac*-**IrC1b** (100 mg, 0.10 mmol), Et<sub>3</sub>N (101 mg, 1.00 mmol) and (*R*)-**2** (33.0 mg, 0.12 mmol) in CH<sub>2</sub>Cl<sub>2</sub> (2 mL) was stirred for 12 h at room temperature, then evaporated to dryness. The produced two diastereomers were separated by preparative TLC (CH<sub>2</sub>Cl<sub>2</sub>/*n*-hexane = 5:1). The less polar fraction was collected as yellow solid and identified to be Δ-**3b** (48.0 mg, 0.0476 mmol, 48% yield), which was used for further synthesis of the nonracemic catalyst Δ-**IrC1b**.

<sup>1</sup>H NMR (500 MHz, CD<sub>2</sub>Cl<sub>2</sub>): δ (ppm) 8.70 (s, 1H), 8.11 (s, 1H), 7.62 (s, 1H), 7.28 (d, *J* = 9.7 Hz, 1H), 7.09–7.01 (m, 3H), 6.94–6.82 (m, 5H), 6.69 (s, 2H), 6.58–6.25 (m, 5H), 5.94 (dd, *J* = 12.2, 7.8 Hz, 1H), 5.87 (d, *J* = 2.6 Hz, 1H), 5.10 (d, *J* = 2.7 Hz, 1H), 4.70–4.62 (m, 2H), 4.04 (d, *J* = 5.4 Hz, 1H), 3.48 (s, 3H), 3.36 (s, 3H), 1.39 (s, 9H), 1.27 (s, 9H).

<sup>13</sup>C NMR (126 MHz, CD<sub>2</sub>Cl<sub>2</sub>): δ (ppm) 176.3, 166.9, 164.3, 164.0, 162.3, 161.6, 157.6, 157.2, 142.0, 141.6, 140.7, 140.0, 136.2, 135.3, 132.9 (d, *J* = 4.7 Hz), 132.8, 129.6, 129.5, 128.1, 127.0, 124.3, 123.2, 122.2 (d, *J* = 11.1 Hz), 121.8, 120.2, 119.7, 117.8, 116.9, 112.9, 112.6, 105.5, 104.9, 104.7, 103.9, 102.6 (d, *J* = 7.5 Hz), 99.5, 99.3, 75.4, 70.1, 54.92, 54.86, 33.7, 33.5, 30.15, 29.9.

IR (film): ν (cm<sup>-1</sup>) 3077, 2962, 2926, 2855, 1621, 1597, 1567, 1530, 1447, 1409, 1367, 1261, 1221, 1098, 1037, 795, 736, 697, 434.

HRMS (ESI, *m/z*) calcd for C<sub>51</sub>H<sub>50</sub>FIrN<sub>5</sub>O<sub>4</sub> (M+H)<sup>+</sup>: 1008.3471, found: 1008.3479.

CD (CH<sub>2</sub>Cl<sub>2</sub>): λ, nm (Δε, M<sup>-1</sup>cm<sup>-1</sup>) 280 (+3), 261 (-1), 245 (+9), 217 (-16).

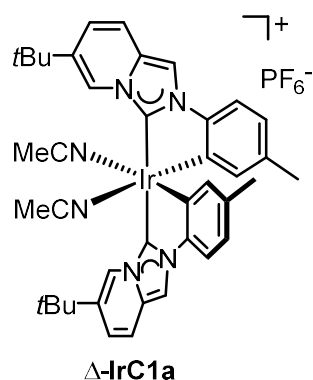

A solution of Δ-**3a** (75.0 mg, 0.077 mmol) and HPF<sub>6</sub> (60% in water, 18.0 μL, 0.085 mmol) in CH<sub>3</sub>CN (4 mL) was stirred at room temperature for 1 min, then evaporated to dryness. The residue was subjected to silica gel chromatography (CH<sub>2</sub>Cl<sub>2</sub>/CH<sub>3</sub>CN = 30:1) to afford Δ-**IrC1a** as a pale brown solid (62.0 mg, 0.063 mmol, 82% yield).

<sup>1</sup>H NMR (500 MHz, CDCl<sub>3</sub>): δ (ppm) 8.38 (s, 2H), 7.76 (s, 2H), 7.42 (d, *J* = 9.8 Hz, 2H), 7.12–7.05 (m, 4H), 6.67 (d, *J* = 7.0 Hz, 2H), 5.75 (s, 2H), 2.35 (s, 6H), 1.95 (s, 6H), 1.38 (s, 18H).

CD (CH<sub>2</sub>Cl<sub>2</sub>): λ, nm (Δε, M<sup>-1</sup>cm<sup>-1</sup>) 279 (+1), 268 (-9), 249 (+12), 225 (-64).

All other spectroscopic data of Δ-**IrC1a** were in agreement with the *rac*-**IrC1a**.

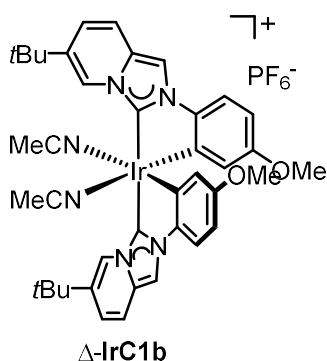

A solution of  $\Delta$ -3b (43.0 mg, 0.043 mmol) and  $\text{HPF}_6$  (60% in water, 10.0  $\mu\text{L}$ , 0.047 mmol,) in  $\text{CH}_3\text{CN}$  (3 mL) was stirred at room temperature for 1 min, then evaporated to dryness. The residue was subjected to silica gel chromatography ( $\text{CH}_2\text{Cl}_2/\text{CH}_3\text{CN} = 30:1$ ) to afford  $\Delta$ -IrC1b as a pale brown solid (40.0 mg, 0.039 mmol, 91% yield).

$^1\text{H}$  NMR (500 MHz,  $\text{CDCl}_3$ ):  $\delta$  (ppm) 8.38 (s, 2H), 7.71 (s, 2H), 7.39 (d,  $J = 9.8$  Hz, 2H), 7.13 (d,  $J = 8.5$  Hz, 2H), 7.06 (d,  $J = 9.6$  Hz, 2H), 6.40 (dd,  $J = 8.5, 2.6$  Hz, 2H), 5.53 (d,  $J = 2.6$  Hz, 2H), 3.45 (s, 6H), 2.36 (s, 6H), 1.38 (s, 18H).

CD ( $\text{CH}_2\text{Cl}_2$ ):  $\lambda$ , nm ( $\Delta\epsilon$ ,  $\text{M}^{-1}\text{cm}^{-1}$ ) 383 (+1), 273 (-3), 257 (+21), 226 (-109).

All other spectroscopic data of  $\Delta$ -IrC1b were in agreement with the *rac*-IrC1b.

## 2.4 Synthesis of the Bis-ammonia Complex $\Delta$ -6

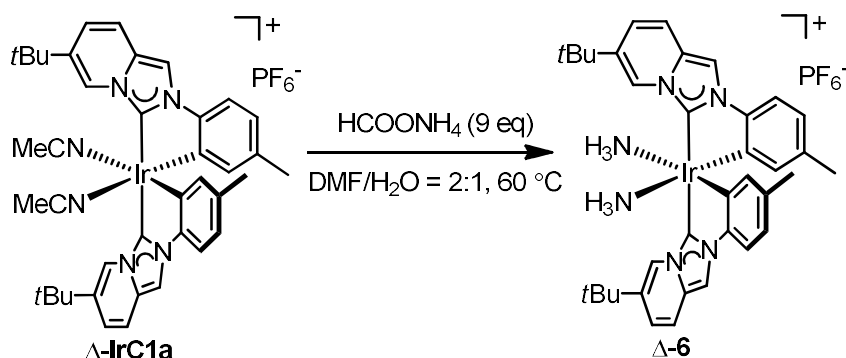

**Scheme S4.** Synthetic route to bis-ammonia complex  $\Delta$ -6.

**Compound  $\Delta$ -6.** A solution of  $\text{HCO}_2\text{NH}_4$  (35.0 mg, 0.55 mmol) and  $\Delta$ -IrC1a (60.0 mg, 0.060 mmol) in  $\text{DMF}/\text{H}_2\text{O}$  (200  $\mu\text{L}/100$   $\mu\text{L}$ ) was stirred at 60  $^\circ\text{C}$  for 3 h, cooled down to room temperature, then dried in high vacuum. The residue was washed with  $\text{CH}_2\text{Cl}_2/n$ -Hexane (1:10, v/v, 6 mL x 3), redissolved in  $\text{CH}_2\text{Cl}_2$  (3 mL), washed with water (2 mL x 3), then dried over  $\text{Na}_2\text{SO}_4$ . The organic layers were combined and concentrated to dryness to afford  $\Delta$ -6 as a pale brown solid (21.0 mg, 0.020 mmol, 33% yield).

$^1\text{H}$  NMR (500 MHz,  $\text{CDCl}_3$ ):  $\delta$  (ppm) 7.76 (s, 2H), 7.68 (s, 2H), 7.41 (d,  $J = 9.8$  Hz, 2H), 7.10 (d,  $J = 7.9$  Hz, 2H), 7.05 (dd,  $J = 9.8, 1.2$  Hz, 2H), 6.64 (dd,  $J = 7.8, 1.0$  Hz, 2H), 5.93 (d,  $J = 1.2$  Hz, 2H), 2.74 (s, 6H), 1.98 (s, 6H), 1.35 (s, 18H).

$^{13}\text{C}$  NMR (126 MHz,  $\text{CDCl}_3$ ):  $\delta$  (ppm) 162.1, 144.5, 139.0, 137.4, 136.0, 132.4, 130.1, 122.9, 122.7, 119.0, 118.0, 112.3, 105.1, 33.6, 29.7, 21.3.

IR (film):  $\nu$  ( $\text{cm}^{-1}$ ) 3373, 3291, 3158, 2961, 2869, 1664, 1620, 1584, 1471, 1399, 1367, 1329, 1261, 1196, 1092, 846, 801, 737, 558.

HRMS (ESI,  $m/z$ ) calcd for  $\text{C}_{36}\text{H}_{44}\text{IrN}_6$  ( $\text{M}-\text{PF}_6$ ) $^+$ : 753.3251, found: 753.3251.



## 2.5 CD Spectra of the Nonracemic Iridium complexes

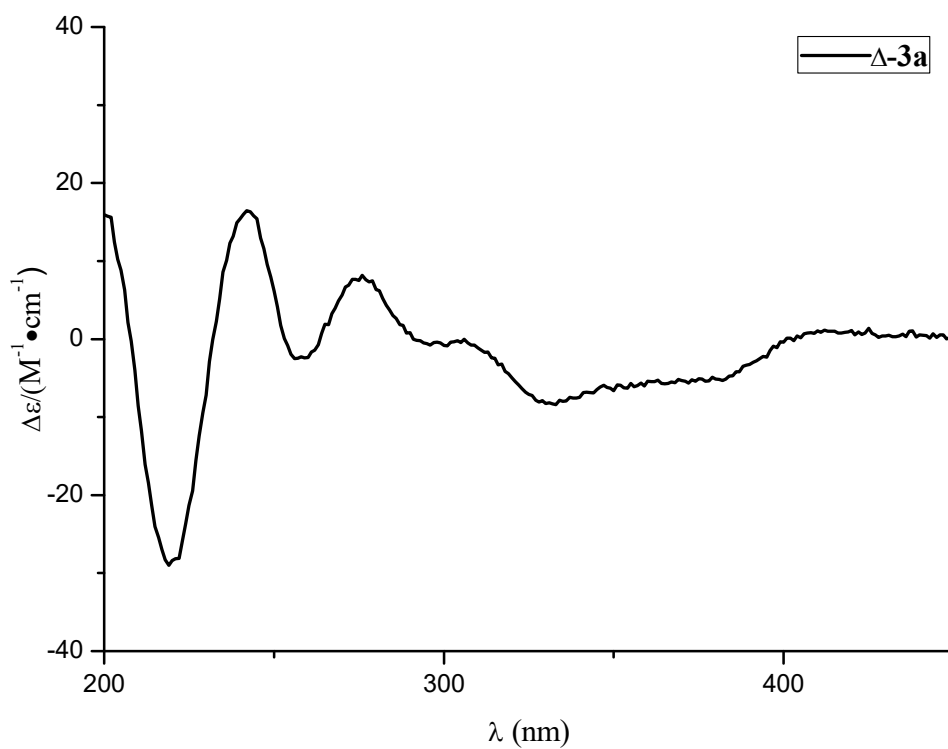

**Figure S1.** CD spectrum of compound  $\Delta$ -3a recorded in MeOH (0.20 mM)

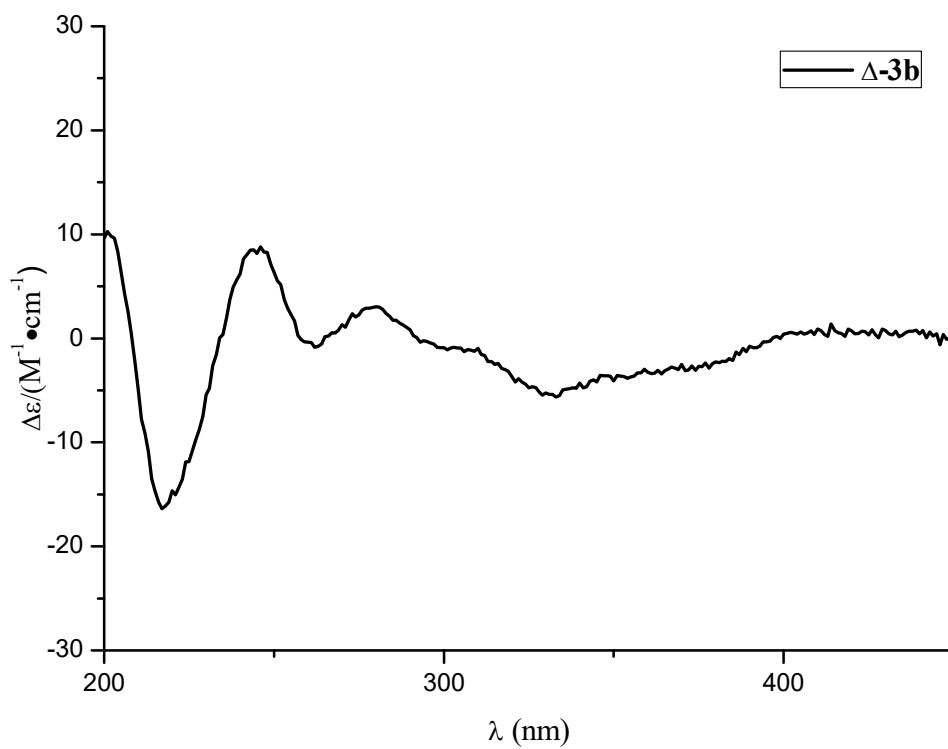

**Figure S2.** CD spectrum of complex  $\Delta$ -3b recorded in MeOH (0.20 mM).

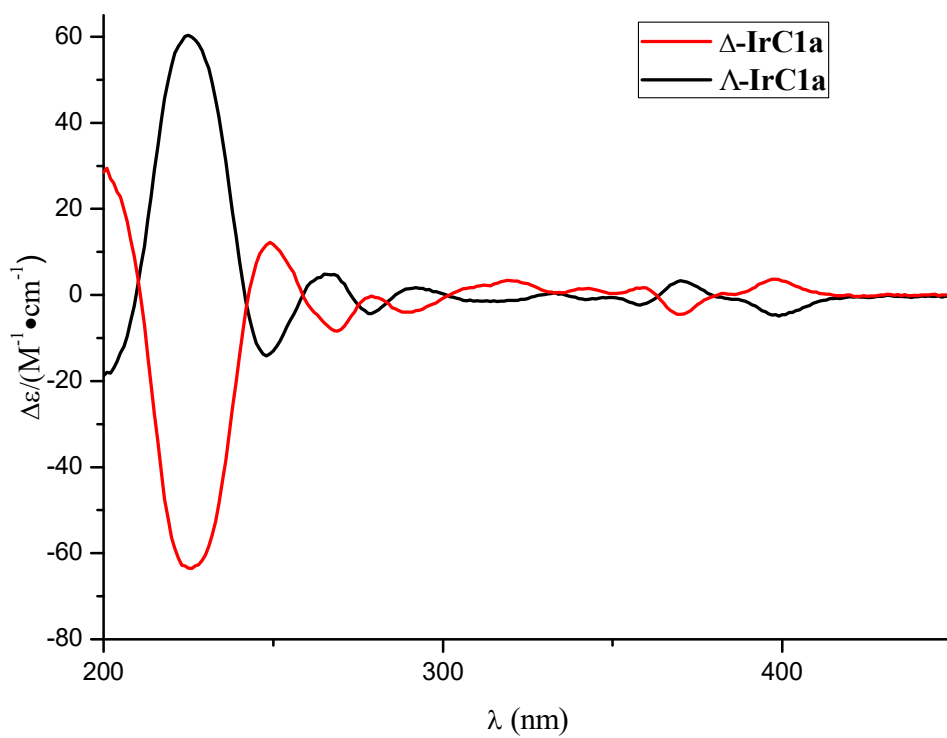

**Figure S3.** CD spectrum of compound  $\Delta$ -IrC1a and  $\Lambda$ -IrC1a recorded in MeOH (0.20 mM)

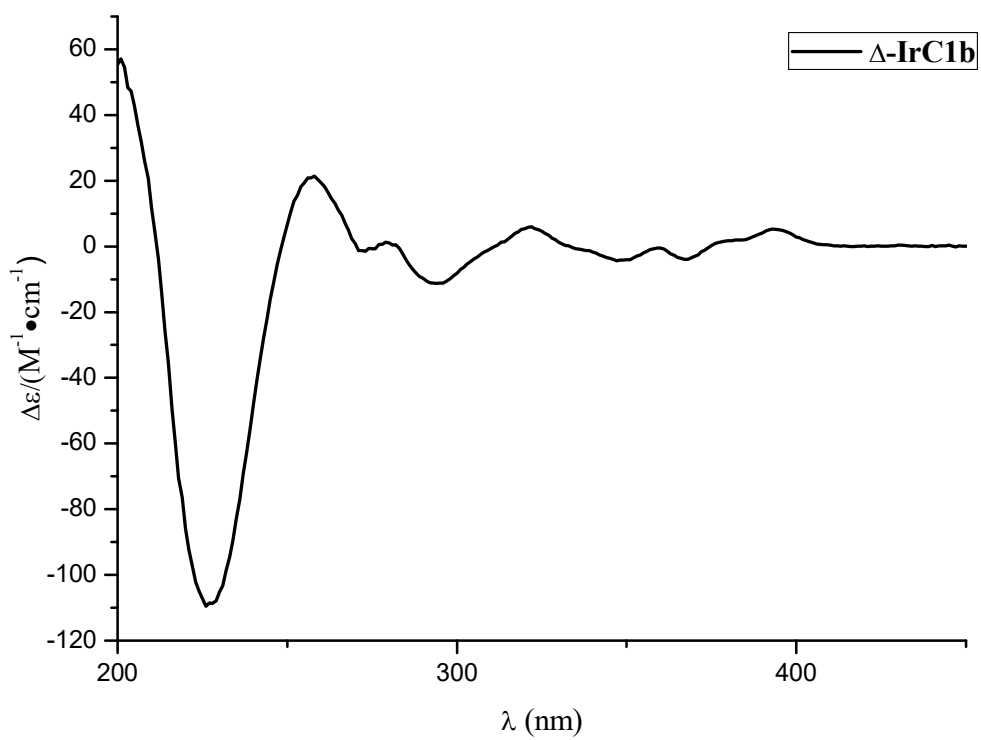

**Figure S4.** CD spectrum of complex  $\Delta$ -IrC1b recorded in MeOH (0.20 mM).

### 3. Synthesis of the Substrates and Racemic Reference Products

#### 3.1 Synthesis of the Substrates

Cyclic *N*-sulfonylimines **4a-b**<sup>4</sup> and **4l-x**<sup>5,6</sup> were prepared according to published procedures, **4c-k** were synthesized by modified methods **A-C**.<sup>7</sup>

##### Method A

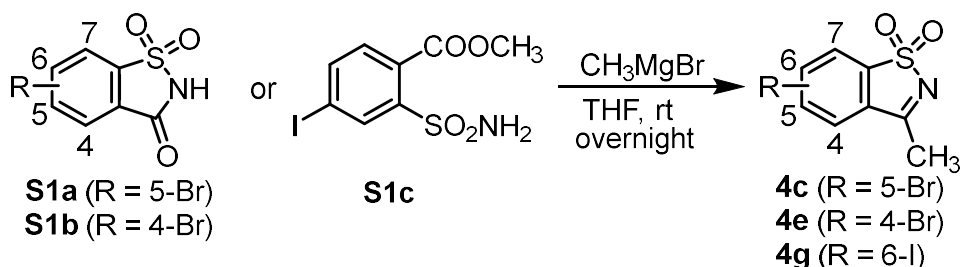

**Scheme S5.** Synthetic route to cyclic *N*-sulfonylimines **4c**, **4e** and **4g**.

**General procedure.** A solution of **S1a-c**<sup>2</sup> in THF (0.1 M) was treated with CH<sub>3</sub>MgBr (3.0 eq, 3.0 M in THF) at 0 °C. The mixture was stirred at room temperature overnight, then quenched with water and extracted with EtOAc (100 mL). The combined organic layers were dried over anhydrous Na<sub>2</sub>SO<sub>4</sub>, filtered, and concentrated under reduced pressure. The residue was purified by flash chromatography on silica gel (CH<sub>2</sub>Cl<sub>2</sub>) to afford pure product **4c**, **4e** or **4g**.

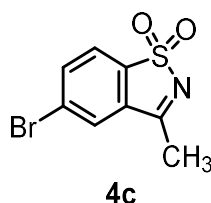

<sup>1</sup>H NMR (500 MHz, CDCl<sub>3</sub>): δ (ppm) 7.88 (dd, *J* = 8.0, 1.4 Hz, 1H), 7.81 (d, *J* = 1.2 Hz, 1H), 7.77 (d, *J* = 8.0 Hz, 1H), 2.66 (s, 3H).

<sup>13</sup>C NMR (126 MHz, CDCl<sub>3</sub>): δ (ppm) 172.0, 138.5, 136.4, 133.4, 128.7, 127.5, 123.6, 17.7.

IR (film): ν (cm<sup>-1</sup>) 3419, 3087, 1611, 1551, 1377, 1325, 1284, 1171, 1145, 1065, 1022, 880, 832, 801, 706, 607, 558, 542.

HRMS (ESI, *m/z*) calcd for C<sub>8</sub>H<sub>6</sub>BrNNaO<sub>2</sub>S (M+Na)<sup>+</sup>: 281.9195, found: 281.9197.

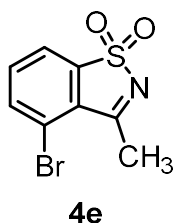

<sup>1</sup>H NMR (500 MHz, CDCl<sub>3</sub>): δ (ppm) 7.89 (dd, *J* = 3.1, 0.8 Hz, 1H), 7.88–7.86 (m, 1H), 7.57 (t, *J* = 7.7 Hz, 1H), 2.92 (s, 3H).

<sup>13</sup>C NMR (126 MHz, CDCl<sub>3</sub>): δ (ppm) 172.6, 142.6, 139.6, 134.8, 130.12, 121.7, 120.5, 22.7.

IR (film): ν (cm<sup>-1</sup>) 3437, 1958, 1633, 1591, 1572, 1548, 1438, 1405, 1325, 1173, 1017, 827, 777, 730, 597, 560, 532, 434.

HRMS (ESI, *m/z*) calcd for C<sub>8</sub>H<sub>6</sub>BrNNaO<sub>2</sub>S (M+Na)<sup>+</sup>: 281.9195, found: 281.9197.

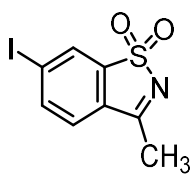

**4g**

$^1\text{H}$  NMR (500 MHz,  $\text{CDCl}_3$ ):  $\delta$  (ppm) 8.24 (d,  $J = 0.8$  Hz, 1H), 8.09 (dd,  $J = 8.0, 1.2$  Hz, 1H), 7.39 (d,  $J = 8.0$  Hz, 1H), 2.64 (s, 3H).

$^{13}\text{C}$  NMR (126 MHz,  $\text{CDCl}_3$ ):  $\delta$  (ppm) 172.7, 143.1, 141.2, 131.6, 131.0, 125.1, 101.4, 17.6.

IR (film):  $\nu$  ( $\text{cm}^{-1}$ ) 3074, 2961, 2915, 2849, 1727, 1650, 1613, 1573, 1546, 1415, 1327, 1261, 1170, 1020, 802, 561.

HRMS (ESI,  $m/z$ ) calcd for  $\text{C}_8\text{H}_6\text{INNaO}_2\text{S}$  ( $\text{M}+\text{Na}$ ) $^+$ : 329.9056, found: 329.9057.

### **Method B**

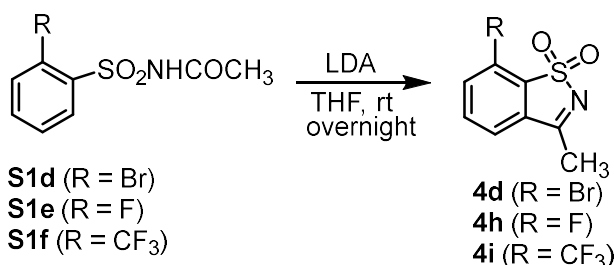

**Scheme S6.** Synthetic route to cyclic *N*-sulfonylimines **4d**, **4h** and **4i**.

**General procedure.** To a solution of diisopropylamine (2.2 eq) in THF (0.1 M) at  $-78$  °C was added dropwise *n*-BuLi (2.0 eq, 2.4 M in hexane). After stirring for 1.5 h at  $-78$  °C, **S1d-f** in THF (1.0 M) was added. The reaction was allowed to warm to room temperature slowly, then stirred overnight. The reaction was quenched with water and extracted with EtOAc. The combined organic layers were dried over anhydrous  $\text{Na}_2\text{SO}_4$ , filtered, and concentrated under reduced pressure. The residue was purified by flash chromatography on silica gel ( $\text{CH}_2\text{Cl}_2$ ) to afford pure product **4d**, **4h** or **4i**.

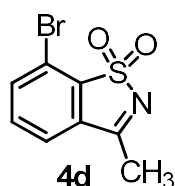

**4d**

$^1\text{H}$  NMR (500 MHz,  $\text{CDCl}_3$ ):  $\delta$  (ppm) 7.86–7.81 (m, 1H), 7.60 (dt,  $J = 15.2, 4.1$  Hz, 2H), 2.66 (s, 3H).

$^{13}\text{C}$  NMR (126 MHz,  $\text{CDCl}_3$ ):  $\delta$  (ppm) 171.7, 139.5, 137.2, 135.3, 133.7, 122.8, 117.7, 17.6.

IR (film):  $\nu$  ( $\text{cm}^{-1}$ ) 3464, 3067, 1958, 1604, 1552, 1323, 831, 780, 721, 593, 556, 530, 483.

HRMS (ESI,  $m/z$ ) calcd for  $\text{C}_8\text{H}_6\text{BrNNaO}_2\text{S}$  ( $\text{M}+\text{Na}$ ) $^+$ : 281.9195, found: 281.9197.

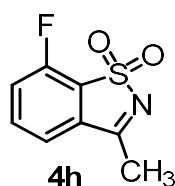

**4h**

$^1\text{H}$  NMR (500 MHz,  $\text{CDCl}_3$ ):  $\delta$  (ppm) 7.76 (ddd,  $J = 8.2, 7.7, 4.6$  Hz, 1H), 7.51–7.47 (m, 1H), 7.41 (t,  $J = 7.9$  Hz, 1H), 2.67 (s, 3H).

$^{13}\text{C}$  NMR (126 MHz,  $\text{CDCl}_3$ ):  $\delta$  (ppm) 172.1, 158.0, 155.9, 137.1 (d,  $J = 6.8$  Hz), 134.6, 121.7 (d,  $J = 20.2$  Hz), 120.0 (d,  $J = 3.6$  Hz), 17.7.

IR (film):  $\nu$  ( $\text{cm}^{-1}$ ) 3083, 2923, 1959, 1572, 1471, 1441, 1417, 1332, 1290, 1177, 830, 560, 522.

HRMS (ESI,  $m/z$ ) calcd for  $\text{C}_8\text{H}_6\text{FNNaO}_2\text{S}$  ( $\text{M}+\text{Na}$ ) $^+$ : 221.9995, found: 221.9997.

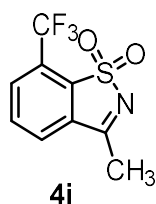

$^1\text{H}$  NMR (500 MHz,  $\text{CDCl}_3$ ):  $\delta$  (ppm) 8.03–7.82 (m, 3H), 2.70 (s, 3H).

$^{13}\text{C}$  NMR (126 MHz,  $\text{CDCl}_3$ ):  $\delta$  (ppm) 171.7, 137.3, 135.0, 133.0, 130.7 (q,  $J = 4.0$  Hz), 127.5, 123.2, 121.1, 17.7.

IR (film):  $\nu$  ( $\text{cm}^{-1}$ ) 3436, 1575, 1421, 1343, 1285, 1219, 1172, 1131, 831, 737, 560, 533.

HRMS (ESI,  $m/z$ ) calcd for  $\text{C}_9\text{H}_6\text{F}_3\text{NNaO}_2\text{S}$  ( $\text{M}+\text{Na}$ ) $^+$ : 271.9964, found: 271.9964.

### Method C

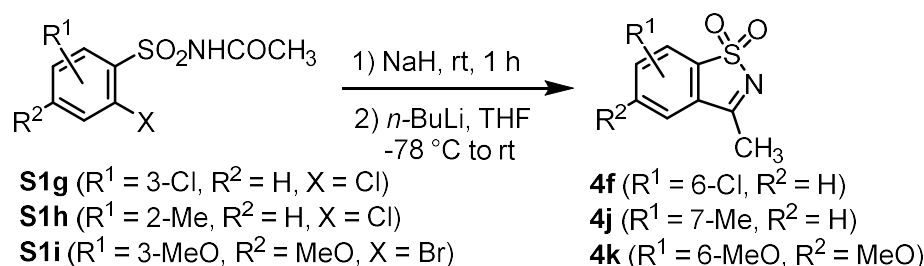

**Scheme S7.** Synthetic route to cyclic *N*-sulfonylimines **4f**, **4j** and **4k**.

**General procedure.** To a solution of NaH (2.0 eq, 60% dispersion in mineral oil) in THF (0.10 M) at room temperature 2-chlorobenzenesulfonamide **S1g-i** in THF (1.0 M) was added dropwise. The reaction mixture was allowed to stir for 30 min at room temperature, then cooled to -78 °C. *n*-BuLi (1.5 eq, 2.4 M in hexane) was added dropwise over 10 min. The reaction mixture was stirred for 1 h at -78 °C, allowed to warm to 0 °C in an ice bath over a period of 1 h, and finally warmed to room temperature over 1 h. The reaction was quenched with water and extracted with EtOAc. The combined organic layers were dried over anhydrous  $\text{Na}_2\text{SO}_4$ , filtered, and concentrated under reduced pressure. The residue was purified by flash chromatography on silica gel ( $\text{CH}_2\text{Cl}_2$ ) to afford product **4f**, **4j** or **4k**.

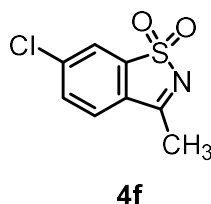

$^1\text{H}$  NMR (500 MHz,  $\text{CDCl}_3$ ):  $\delta$  (ppm) 7.85–7.81 (m, 1H), 7.71–7.65 (m, 2H), 2.89 (s, 3H).

$^{13}\text{C}$  NMR (126 MHz,  $\text{CDCl}_3$ ):  $\delta$  (ppm) 171.1, 141.5, 135.0, 133.9, 131.5, 127.3, 120.1, 21.6.

IR (film):  $\nu$  ( $\text{cm}^{-1}$ ) 3270, 3066, 2960, 2920, 1721, 1592, 1575, 1552, 1446, 1372, 1332, 1265, 1174, 829, 800, 735, 595, 563, 487.

HRMS (ESI,  $m/z$ ) calcd for  $\text{C}_8\text{H}_6\text{ClNNaO}_2\text{S}$  ( $\text{M}+\text{Na}$ ) $^+$ : 220.0403, found: 220.0405.

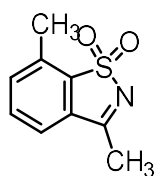

**4j**

$^1\text{H}$  NMR (500 MHz,  $\text{CDCl}_3$ ):  $\delta$  (ppm) 7.59 (t,  $J = 7.6$  Hz, 1H), 7.54–7.43 (m, 2H), 2.69 (s, 3H), 2.62 (s, 3H).

$^{13}\text{C}$  NMR (126 MHz,  $\text{CDCl}_3$ ):  $\delta$  (ppm) 173.5, 137.8, 135.6, 135.3, 134.0, 131.7, 121.6, 17.7, 17.3.

IR (film):  $\nu$  ( $\text{cm}^{-1}$ ) 2962, 2920, 2851, 1726, 1564, 1464, 1415, 1318, 1290, 1261, 1170, 1098, 1019, 830, 794, 611, 556, 538, 489.

HRMS (ESI,  $m/z$ ) calcd for  $\text{C}_9\text{H}_9\text{NNaO}_2\text{S}$  ( $\text{M}+\text{Na}$ ) $^+$ : 220.0403, found: 220.0405.

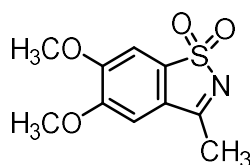

**4k**

$^1\text{H}$  NMR (500 MHz,  $\text{CDCl}_3$ ):  $\delta$  (ppm) 7.36 (s, 1H), 7.01 (s, 1H), 4.00 (d,  $J = 4.1$  Hz, 6H), 2.62 (s, 3H).

$^{13}\text{C}$  NMR (126 MHz,  $\text{CDCl}_3$ ):  $\delta$  (ppm) 173.2, 153.9, 153.5, 133.4, 124.8, 105.3, 104.8, 56.9, 56.7, 17.7.

IR (film):  $\nu$  ( $\text{cm}^{-1}$ ) 2961, 1958, 1611, 1576, 1537, 1502, 1459, 1406, 1310, 1257, 1155, 1015, 847, 792, 562.

HRMS (ESI,  $m/z$ ) calcd for  $\text{C}_{10}\text{H}_{11}\text{NNaO}_4\text{S}$  ( $\text{M}+\text{Na}$ ) $^+$ : 264.0301, found: 264.0306.

### 3.2 Synthesis of the Racemic Reference Products

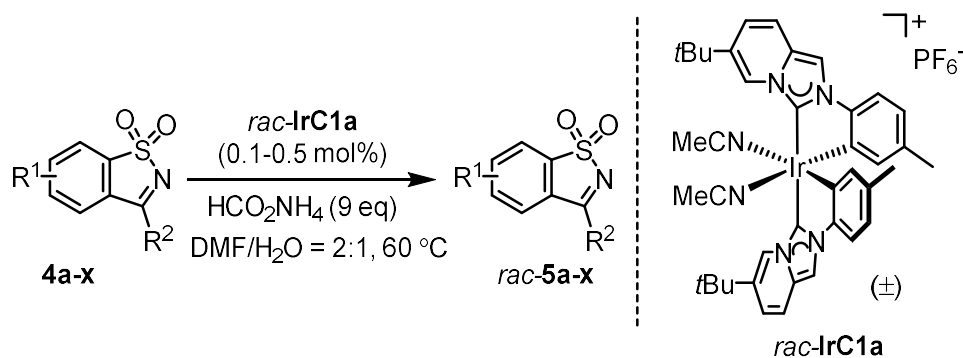

**Scheme S8.** Synthesis of racemic reference compounds *rac-5a-x*.

**General procedure for synthesis of the racemic reference products catalyzed by *rac-IrC1a*.** A solution of cyclic *N*-sulfonylimines **4a-x** (0.10 mmol),  $\text{HCO}_2\text{NH}_4$  (56.8 mg, 0.90 mmol) and *rac-IrC1a* (0.1–0.5 mol%) in  $\text{DMF}/\text{H}_2\text{O}$  (133  $\mu\text{L}$ /67  $\mu\text{L}$ ) was stirred at 60 °C until it was complete, which was monitored by TLC analysis. Afterwards, the reaction mixture was dried *in vacuo* and purified by column chromatograph on silica gel ( $\text{CH}_2\text{Cl}_2$  or EtOAc) to afford *rac-5a-x* as HPLC reference for the determination of enantiomeric excess.

## 4. ATH of Cyclic *N*-Sulfonylimines by the Iridium Catalysts

### 4.1 Optimization of the Reaction Conditions

**Note:** For the low loading catalysis, all the catalysts were used as a freshly prepared stock solution.

**Preparation of the stock solutions.** A stock solution of  $\Delta$ -IrC1a in DMF (2.5 mM):  $\Delta$ -IrC1a (2.50 mg, 2.5  $\mu$ mol) was dissolved in DMF (1000  $\mu$ L); A stock solution of  $\Delta$ -IrC1a in DMF (1.0 mM):  $\Delta$ -IrC1a (2.50 mg, 2.5  $\mu$ mol) was dissolved in DMF (2500  $\mu$ L); A stock solution of  $\Delta$ -IrC1b in DMF (2.5 mM):  $\Delta$ -IrC1b (2.53 mg, 2.5  $\mu$ mol) was dissolved in DMF (1000  $\mu$ L); A stock solution of  $\Delta$ -IrO in DMF (2.5 mM):  $\Delta$ -IrO<sup>1</sup> (2.48 mg, 2.5  $\mu$ mol) was dissolved in DMF (1000  $\mu$ L); A stock solution of  $\Delta$ -IrS in DMF (2.5 mM):  $\Delta$ -IrS<sup>1</sup> (2.50 mg, 2.5  $\mu$ mol) was dissolved in DMF (1000  $\mu$ L); A stock solution of  $\Delta$ -6 in DMF (2.5 mM):  $\Delta$ -6 (2.25 mg, 2.5  $\mu$ mol) was dissolved in DMF (1000  $\mu$ L).

**Table S1.** Optimization of reaction conditions for the ATH reactions of cyclic *N*-sulfonylimine **4a**.

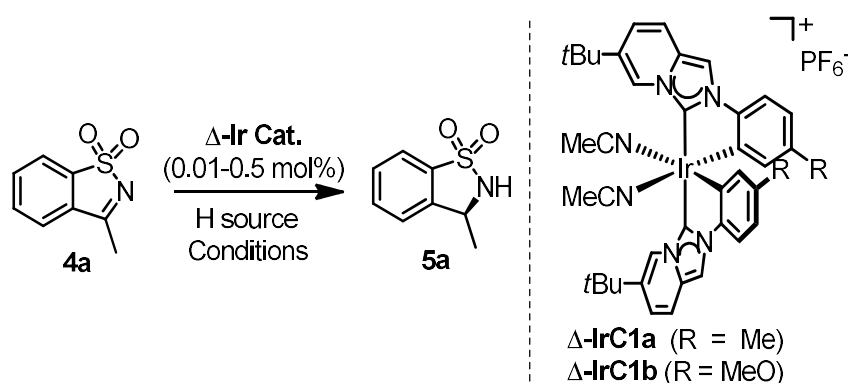

| Entry | catalyst(mol%)         | H source                         | conc. (M) | solvent                                  | T (°C) | t (h) | conv. (%) | ee (%) |
|-------|------------------------|----------------------------------|-----------|------------------------------------------|--------|-------|-----------|--------|
| 1     | $\Delta$ -IrC1a (0.5)  | HCO <sub>2</sub> NH <sub>4</sub> | 0.5       | THF/H <sub>2</sub> O (1:1)               | 50     | 6     | 64        | 93     |
| 2     | $\Delta$ -IrC1a (0.5)  | HCO <sub>2</sub> NH <sub>4</sub> | 0.5       | <i>i</i> PrOH/H <sub>2</sub> O(1:1)      | 50     | 6     | 55        | 97     |
| 3     | $\Delta$ -IrC1a (0.5)  | HCO <sub>2</sub> NH <sub>4</sub> | 0.5       | DCE/H <sub>2</sub> O (1:1)               | 50     | 6     | 86        | 86     |
| 4     | $\Delta$ -IrC1a (0.5)  | HCO <sub>2</sub> NH <sub>4</sub> | 0.5       | CH <sub>3</sub> CN/H <sub>2</sub> O(1:1) | 50     | 6     | 13        | 97     |
| 5     | $\Delta$ -IrC1a (0.5)  | HCO <sub>2</sub> NH <sub>4</sub> | 0.5       | DMF/H <sub>2</sub> O (1:1)               | 50     | 3.5   | 98        | 98     |
| 6     | $\Delta$ -IrC1a (0.5)  | HCO <sub>2</sub> NH <sub>4</sub> | 0.5       | TFE/H <sub>2</sub> O (1:1)               | 50     | 6     | trace     | n.d.   |
| 7     | $\Delta$ -IrC1a (0.5)  | HCO <sub>2</sub> NH <sub>4</sub> | 0.5       | DMF/H <sub>2</sub> O (2:1)               | 50     | 2.5   | 93        | 99     |
| 8     | $\Delta$ -IrC1a (0.5)  | HCO <sub>2</sub> NH <sub>4</sub> | 0.5       | DMF/H <sub>2</sub> O (4:1)               | 50     | 2.5   | 90        | 97     |
| 9     | $\Delta$ -IrC1a (0.5)  | HCO <sub>2</sub> NH <sub>4</sub> | 0.5       | DMF/H <sub>2</sub> O (6:1)               | 50     | 2.5   | 71        | 98     |
| 10    | $\Delta$ -IrC1a (0.5)  | HCO <sub>2</sub> NH <sub>4</sub> | 0.5       | DMF/H <sub>2</sub> O (8:1)               | 50     | 2.5   | 70        | 97     |
| 11    | $\Delta$ -IrC1a (0.5)  | HCO <sub>2</sub> NH <sub>4</sub> | 0.5       | DMF                                      | 50     | 2.5   | 67        | 91     |
| 12    | $\Delta$ -IrC1a (0.5)  | HCO <sub>2</sub> NH <sub>4</sub> | 0.5       | DMF/H <sub>2</sub> O (1:2)               | 50     | 2.5   | 48        | 96     |
| 13    | $\Delta$ -IrC1a (0.5)  | HCO <sub>2</sub> NH <sub>4</sub> | 0.5       | DMF/H <sub>2</sub> O (1:4)               | 50     | 2.5   | 9         | n.d.   |
| 14    | $\Delta$ -IrC1a (0.2)  | HCO <sub>2</sub> NH <sub>4</sub> | 0.5       | DMF/H <sub>2</sub> O (2:1)               | 50     | 5     | 90        | 99     |
| 15    | $\Delta$ -IrC1a (0.1)  | HCO <sub>2</sub> NH <sub>4</sub> | 0.5       | DMF/H <sub>2</sub> O (2:1)               | 50     | 5     | 62        | 98     |
| 16    | $\Delta$ -IrC1a (0.05) | HCO <sub>2</sub> NH <sub>4</sub> | 0.5       | DMF/H <sub>2</sub> O (2:1)               | 50     | 11    | 90        | 97     |
| 17    | $\Delta$ -IrC1a (0.05) | HCO <sub>2</sub> NH <sub>4</sub> | 1.0       | DMF/H <sub>2</sub> O (2:1)               | 50     | 2.5   | 93        | 97     |
| 18    | $\Delta$ -IrC1a (0.05) | HCO <sub>2</sub> NH <sub>4</sub> | 0.2       | DMF/H <sub>2</sub> O (2:1)               | 50     | 2.5   | 92        | 96     |
| 19    | $\Delta$ -IrC1a (0.05) | HCO <sub>2</sub> NH <sub>4</sub> | 0.5       | DMF/H <sub>2</sub> O (2:1)               | 40     | 36    | 89        | 96     |
| 20    | $\Delta$ -IrC1a (0.05) | HCO <sub>2</sub> NH <sub>4</sub> | 0.5       | DMF/H <sub>2</sub> O (2:1)               | 60     | 5     | 91        | 98     |
| 21    | $\Delta$ -IrC1a (0.02) | HCO <sub>2</sub> NH <sub>4</sub> | 0.5       | DMF/H <sub>2</sub> O (2:1)               | 60     | 12    | 88        | 94     |

|    |                        |                                               |     |                            |    |    |       |      |
|----|------------------------|-----------------------------------------------|-----|----------------------------|----|----|-------|------|
| 22 | $\Delta$ -IrC1a (0.01) | HCO <sub>2</sub> NH <sub>4</sub>              | 0.5 | DMF/H <sub>2</sub> O (2:1) | 60 | 17 | 82    | 90   |
| 23 | $\Delta$ -IrC1b (0.05) | HCO <sub>2</sub> NH <sub>4</sub>              | 0.5 | DMF/H <sub>2</sub> O (2:1) | 60 | 5  | 70    | 92   |
| 24 | $\Delta$ -IrO (0.05)   | HCO <sub>2</sub> NH <sub>4</sub>              | 0.5 | DMF/H <sub>2</sub> O (2:1) | 60 | 5  | trace | n.d. |
| 25 | $\Delta$ -IrS (0.05)   | HCO <sub>2</sub> NH <sub>4</sub>              | 0.5 | DMF/H <sub>2</sub> O (2:1) | 60 | 5  | 17    | 94   |
| 26 | $\Delta$ -IrC1a (0.05) | HCO <sub>2</sub> Na                           | 0.5 | DMF/H <sub>2</sub> O (2:1) | 60 | 5  | 12    | 15   |
| 27 | $\Delta$ -IrC1a (0.05) | HCO <sub>2</sub> H/Et <sub>3</sub> N<br>(5:2) | 0.5 | DMF/H <sub>2</sub> O (2:1) | 60 | 5  | 94    | 67   |
| 28 | $\Delta$ -6 (0.05)     | HCO <sub>2</sub> NH <sub>4</sub>              | 0.5 | DMF/H <sub>2</sub> O (2:1) | 60 | 5  | 98    | 94   |

### General Procedure.

**For entries 1-22:** A solution of **4a** (18.1 mg, 0.10 mmol), HCO<sub>2</sub>NH<sub>4</sub> (56.8 mg, 0.90 mmol), and  $\Delta$ -IrC1a (0.01–0.5 mol%) in the indicated solvent was stirred at 40–60 °C for 2.5–36 h. The conversion was determined by <sup>1</sup>H NMR analysis of the crude product, and ee values were determined by chiral HPLC chromatography using a Daicel Chiralpak OD-H column.

**For entries 23-28:** A solution of **4a** (18.1 mg, 0.10 mmol), the indicated hydrogen source (0.90 mmol), and indicated catalyst (0.050  $\mu$ mol, 20  $\mu$ L of a 2.5 mM stock solution of indicated catalyst in DMF) in DMF/H<sub>2</sub>O (113  $\mu$ L/67  $\mu$ L) was stirred at 60 °C for 5 h. The conversion was determined by <sup>1</sup>H NMR analysis of the crude product, and ee values were determined by chiral HPLC chromatography using a Daicel Chiralpak OD-H column.

### 4.2 Substrate Scope

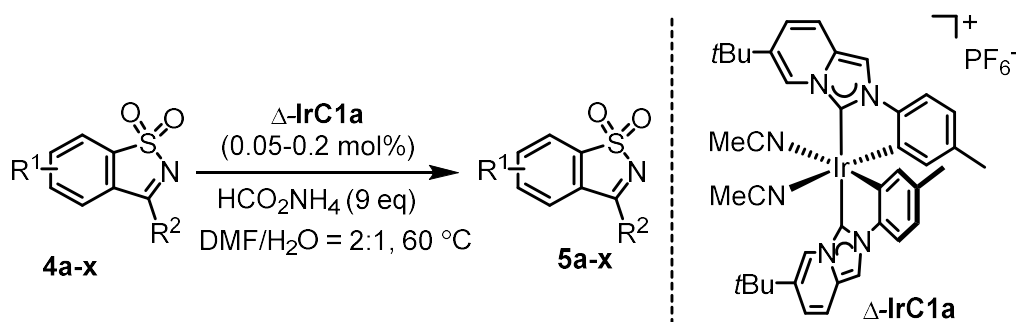

**Scheme S9.** Substrate scope of the ATH reaction of cyclic *N*-sulfonylimines catalyzed by  $\Delta$ -IrC1a.

**General Procedure.** A solution of cyclic *N*-sulfonylimines **4a-x** (0.20 mmol), HCO<sub>2</sub>NH<sub>4</sub> (113.5 mg, 1.80 mmol), and  $\Delta$ -IrC1a (0.05–0.2 mol%) in DMF/H<sub>2</sub>O was stirred at 60 °C for indicated time until complete disappearance of the starting material, cooled down to room temperature, then dried in *vacuo*. The residue was purified by flash chromatography on silica gel (CH<sub>2</sub>Cl<sub>2</sub> or EtOAc) to afford product **5a-x**. Enantiomeric excess was established by HPLC analysis. Absolute configuration of the products were assigned as *S* by comparing their optical rotation with the literature.<sup>6</sup>

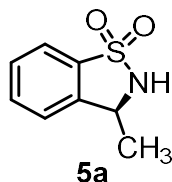

A solution of cyclic *N*-sulfonylimine **4a** (36.2 mg, 0.20 mmol), HCO<sub>2</sub>NH<sub>4</sub> (113.5 mg, 1.80 mmol), and  $\Delta$ -IrC1a (0.10  $\mu$ mol, 40  $\mu$ L of a 2.5 mM stock solution of  $\Delta$ -IrC1a in DMF) in DMF/H<sub>2</sub>O (227  $\mu$ L/133  $\mu$ L) was stirred at 60 °C for 6 h, cooled down to room temperature, then dried in *vacuo*. The residue was purified by flash chromatography on silica gel (CH<sub>2</sub>Cl<sub>2</sub>) to afford product **5a** as a white solid (36.2 mg, 0.197 mmol, yield: 99%). Enantiomeric excess was established by HPLC analysis using a Chiralpak OD-



H column, ee = 98% (HPLC: OD-H, 220 nm, *n*-hexane/isopropanol = 80:20, flow rate 0.7 mL/min, 30 °C,  $t_r(\text{major}) = 15.3$  min,  $t_r(\text{minor}) = 19.6$  min.  $[\alpha]_D^{25} = -25.5^\circ$  ( $c = 1.0$ ,  $\text{CHCl}_3$ ).

$^1\text{H NMR}$  (500 MHz,  $\text{CDCl}_3$ ):  $\delta$  (ppm) 7.77 (d,  $J = 7.8$  Hz, 1H), 7.63 (t,  $J = 7.3$  Hz, 1H), 7.52 (t,  $J = 7.5$  Hz, 1H), 7.39 (d,  $J = 7.8$  Hz, 1H), 4.83–4.75 (m, 1H), 4.68 (br, 1H), 1.62 (d,  $J = 6.5$  Hz, 3H).

Other analytic data of **5a** are consistent with the literature.<sup>6</sup>

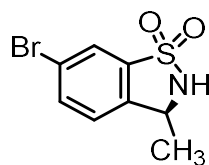

**5b**

A solution of cyclic *N*-sulfonylimine **4b** (52.0 mg, 0.20 mmol),  $\text{HCO}_2\text{NH}_4$  (113.5 mg, 1.80 mmol), and  $\Delta\text{-IrC1a}$  (0.10  $\mu\text{mol}$ , 40  $\mu\text{L}$  of a 2.5 mM stock solution of  $\Delta\text{-IrC1a}$  in DMF) in DMF/ $\text{H}_2\text{O}$  (227  $\mu\text{L}$ /133  $\mu\text{L}$ ) was stirred at 60 °C for 4 h, cooled down to room temperature, then dried in *vacuo*. The residue was purified by flash chromatography on silica gel ( $\text{CH}_2\text{Cl}_2$ ) to afford product **5b** as a white solid (51.4 mg, 0.196 mmol, yield: 98%). Enantiomeric excess was established by HPLC analysis using a Chiralpak OD-H column, ee = 97% (HPLC: OD-H, 254 nm, *n*-hexane/isopropanol = 80:20, flow rate 0.7 mL/min, 30 °C,  $t_r(\text{major}) = 11.5$  min,  $t_r(\text{minor}) = 14.3$  min.  $[\alpha]_D^{25} = -22.9^\circ$  ( $c = 1.0$ ,  $\text{CHCl}_3$ ).

$^1\text{H NMR}$  (500 MHz,  $\text{CDCl}_3$ ):  $\delta$  (ppm) 7.89 (d,  $J = 1.2$  Hz, 1H), 7.73 (dd,  $J = 8.2, 1.5$  Hz, 1H), 7.27 (d,  $J = 8.6$  Hz, 1H), 4.81–4.68 (m, 2H), 1.61 (d,  $J = 6.5$  Hz, 3H).

Other analytic data of **5b** are consistent with the literature.<sup>8</sup>

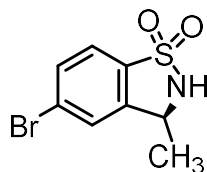

**5c**

A solution of cyclic *N*-sulfonylimine **4c** (52.0 mg, 0.20 mmol),  $\text{HCO}_2\text{NH}_4$  (113.5 mg, 1.80 mmol), and  $\Delta\text{-IrC1a}$  (0.10  $\mu\text{mol}$ , 40  $\mu\text{L}$  of a 2.5 mM stock solution of  $\Delta\text{-IrC1a}$  in DMF) in DMF/ $\text{H}_2\text{O}$  (227  $\mu\text{L}$ /133  $\mu\text{L}$ ) was stirred at 60 °C for 5 h, cooled down to room temperature, then dried in *vacuo*. The residue was purified by flash chromatography on silica gel ( $\text{CH}_2\text{Cl}_2$ ) to afford product **5c** as a white solid (49.8 mg, 0.190 mmol, yield: 95%). Enantiomeric excess was established by HPLC analysis using a Chiralpak OD-H column, ee = 97% (HPLC: OD-H, 254 nm, *n*-hexane/isopropanol = 80:20, flow rate 0.7 mL/min, 30 °C,  $t_r(\text{major}) = 13.3$  min,  $t_r(\text{minor}) = 17.0$  min.  $[\alpha]_D^{25} = -26.6^\circ$  ( $c = 0.2$ ,  $\text{CHCl}_3$ ).

$^1\text{H NMR}$  (500 MHz,  $\text{CDCl}_3$ ):  $\delta$  (ppm) 7.69–7.60 (m, 2H), 7.55 (s, 1H), 4.89–4.60 (m, 2H), 1.62 (d,  $J = 6.5$  Hz, 3H).

Other analytic data of **5c** are consistent with the literature.<sup>8</sup>

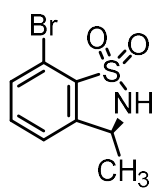

**5d**

A solution of cyclic *N*-sulfonylimine **4d** (52.0 mg, 0.20 mmol),  $\text{HCO}_2\text{NH}_4$  (113.5 mg, 1.80 mmol), and  $\Delta\text{-IrC1a}$  (0.10  $\mu\text{mol}$ , 40  $\mu\text{L}$  of a 2.5 mM stock solution of  $\Delta\text{-IrC1a}$  in DMF) in DMF/ $\text{H}_2\text{O}$  (227  $\mu\text{L}$ /133

$\mu\text{L}$ ) was stirred at 60 °C for 4 h, cooled down to room temperature, then dried in *vacuo*. The residue was purified by flash chromatography on silica gel ( $\text{CH}_2\text{Cl}_2$ ) to afford product **5d** as a white solid (51.7 mg, 0.197 mmol, yield: 99%). Enantiomeric excess was established by HPLC analysis using a Chiralpak OD-H column, ee = 95% (HPLC: OD-H, 220 nm, *n*-hexane/isopropanol = 90:10, flow rate 0.8 mL/min, 30 °C,  $t_r(\text{major}) = 57.7$  min,  $t_r(\text{minor}) = 64.5$  min.  $[\alpha]_{\text{D}}^{25} = -2.4^\circ$  ( $c = 1.0$ ,  $\text{CHCl}_3$ ).

$^1\text{H}$  NMR (500 MHz,  $\text{CDCl}_3$ ):  $\delta$  (ppm) 7.62 (d,  $J = 7.8$  Hz, 1H), 7.46 (t,  $J = 7.8$  Hz, 1H), 7.33 (d,  $J = 7.7$  Hz, 1H), 4.85 (s, 1H), 4.72 (dd,  $J = 13.2, 6.5$  Hz, 1H), 1.61 (d,  $J = 6.7$  Hz, 3H).

$^{13}\text{C}$  NMR (126 MHz,  $\text{CDCl}_3$ ):  $\delta$  (ppm) 144.8, 135.8, 134.4, 133.3, 122.9, 116.0, 52.1, 21.4.

IR (film):  $\nu$  ( $\text{cm}^{-1}$ ) 3240, 2989, 2962, 1958, 1588, 1454, 1392, 1321, 1262, 1163, 1089, 1027, 829, 744, 560, 526.

HRMS (ESI,  $m/z$ ) calcd for  $\text{C}_8\text{H}_8\text{BrNNaO}_2\text{S}$  ( $\text{M}+\text{Na}$ ) $^+$ : 283.9351, found: 283.9354.

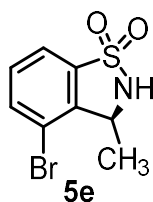

A solution of cyclic *N*-sulfonylimine **4e** (52.0 mg, 0.20 mmol),  $\text{HCO}_2\text{NH}_4$  (113.5 mg, 1.80 mmol), and  $\Delta$ -**IrC1a** (0.10  $\mu\text{mol}$ , 40  $\mu\text{L}$  of a 2.5 mM stock solution of  $\Delta$ -**IrC1a** in DMF) in DMF/ $\text{H}_2\text{O}$  (227  $\mu\text{L}$ /133  $\mu\text{L}$ ) was stirred at 60 °C for 5 h, cooled down to room temperature, then dried in *vacuo*. The residue was purified by flash chromatography on silica gel ( $\text{CH}_2\text{Cl}_2$ ) to afford product **5e** as a white solid (48.8 mg, 0.186 mmol, yield: 93%). Enantiomeric excess was established by HPLC analysis using a Chiralpak OD-H column, ee = 94% (HPLC: OD-H, 254 nm, *n*-hexane/isopropanol = 90:10, flow rate 0.8 mL/min, 30 °C,  $t_r(\text{major}) = 22.2$  min,  $t_r(\text{minor}) = 25.4$  min.  $[\alpha]_{\text{D}}^{25} = -44.8^\circ$  ( $c = 1.0$ ,  $\text{CHCl}_3$ ).

$^1\text{H}$  NMR (500 MHz,  $\text{CDCl}_3$ ):  $\delta$  (ppm) 7.74 (dd,  $J = 7.9, 0.8$  Hz, 1H), 7.72 (d,  $J = 7.7$  Hz, 1H), 7.40 (t,  $J = 7.8$  Hz, 1H), 5.10 (s, 1H), 4.73 (q,  $J = 6.7$  Hz, 1H), 1.69 (d,  $J = 6.7$  Hz, 3H).

$^{13}\text{C}$  NMR (126 MHz,  $\text{CDCl}_3$ ):  $\delta$  (ppm) 141.5, 137.6, 136.8, 131.1, 120.5, 119.3, 54.7, 20.4.

IR (film):  $\nu$  ( $\text{cm}^{-1}$ ) 3260, 3079, 2962, 2923, 2851, 1589, 1444, 1288, 1261, 1142, 1075, 1018, 793, 573, 535.

HRMS (ESI,  $m/z$ ) calcd for  $\text{C}_8\text{H}_8\text{BrNNaO}_2\text{S}$  ( $\text{M}+\text{Na}$ ) $^+$ : 283.9351, found: 283.9356.

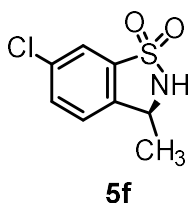

A solution of cyclic *N*-sulfonylimine **4f** (43.1 mg, 0.20 mmol),  $\text{HCO}_2\text{NH}_4$  (113.5 mg, 1.80 mmol), and  $\Delta$ -**IrC1a** (0.10  $\mu\text{mol}$ , 40  $\mu\text{L}$  of a 2.5 mM stock solution of  $\Delta$ -**IrC1a** in DMF) in DMF/ $\text{H}_2\text{O}$  (227  $\mu\text{L}$ /133  $\mu\text{L}$ ) was stirred at 60 °C for 4.5 h, cooled down to room temperature, then dried in *vacuo*. The residue was purified by flash chromatography on silica gel ( $\text{CH}_2\text{Cl}_2$ ) to afford product **5f** as a white solid (41.8 mg, 0.192 mmol, yield: 96%). Enantiomeric excess was established by HPLC analysis using a Chiralpak OD-H column, ee = 96% (HPLC: OD-H, 220 nm, *n*-hexane/isopropanol = 95:5, flow rate 0.8 mL/min, 30 °C,  $t_r(\text{major}) = 35.8$  min,  $t_r(\text{minor}) = 38.9$  min.  $[\alpha]_{\text{D}}^{25} = -35.9^\circ$  ( $c = 1.0$ ,  $\text{CHCl}_3$ ).

$^1\text{H}$  NMR (500 MHz,  $\text{CDCl}_3$ ):  $\delta$  (ppm) 7.69 (d,  $J = 7.7$  Hz, 1H), 7.59 (d,  $J = 7.9$  Hz, 1H), 7.49 (t,  $J = 7.8$  Hz, 1H), 4.92–4.76 (m, 2H), 1.71 (d,  $J = 6.6$  Hz, 3H).

$^{13}\text{C}$  NMR (126 MHz,  $\text{CDCl}_3$ ):  $\delta$  (ppm) 139.5, 137.8, 133.7, 131.1, 130.8, 120.0, 53.4, 20.5.

IR (film):  $\nu$  ( $\text{cm}^{-1}$ ) 3533, 3264, 3081, 2962, 2927, 2854, 1721, 1574, 1446, 1372, 1293, 1262, 1168, 1148, 100, 809, 731, 661, 576, 557, 436.

HRMS (ESI,  $m/z$ ) calcd for  $\text{C}_8\text{H}_8\text{ClNNaO}_2\text{S}$  ( $\text{M}+\text{Na}$ ) $^+$ : 239.9856, found: 239.9860.

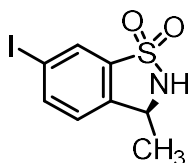

**5g**

A solution of cyclic *N*-sulfonylimine **4g** (61.4 mg, 0.20 mmol),  $\text{HCO}_2\text{NH}_4$  (113.5 mg, 1.80 mmol), and  $\Delta\text{-IrC1a}$  (0.40  $\mu\text{mol}$ , 160  $\mu\text{L}$  of a 2.5 mM stock solution of  $\Delta\text{-IrC1a}$  in DMF) in DMF/ $\text{H}_2\text{O}$  (107  $\mu\text{L}$ /133  $\mu\text{L}$ ) was stirred at 60  $^\circ\text{C}$  for 5 h, cooled down to room temperature, then dried in *vacuo*. The residue was purified by flash chromatography on silica gel ( $\text{CH}_2\text{Cl}_2$ ) to afford product **5g** as a white solid (50.7 mg, 0.164 mmol, yield: 82%). Enantiomeric excess was established by HPLC analysis using a Chiralpak OD-H column, ee = 97% (HPLC: OD-H, 220 nm, *n*-hexane/isopropanol = 80:20, flow rate 0.7 mL/min, 30  $^\circ\text{C}$ ,  $t_r(\text{major})$  = 13.0 min,  $t_r(\text{minor})$  = 16.5 min.  $[\alpha]_{\text{D}}^{25}$  = -16.3 $^\circ$  ( $c$  = 1.0,  $\text{CHCl}_3$ ).

$^1\text{H}$  NMR (500 MHz,  $\text{CDCl}_3$ ):  $\delta$  (ppm) 8.07 (d,  $J$  = 1.1 Hz, 1H), 7.92 (dd,  $J$  = 8.1, 1.4 Hz, 1H), 7.14 (d,  $J$  = 8.1 Hz, 1H), 4.76–4.67 (m, 2H), 1.60 (d,  $J$  = 6.5 Hz, 3H).

$^{13}\text{C}$  NMR (126 MHz,  $\text{CDCl}_3$ ):  $\delta$  (ppm) 142.2, 141.4, 137.7, 130.2, 125.7, 93.7, 53.3, 21.3.

IR (film):  $\nu$  ( $\text{cm}^{-1}$ ) 3258, 2963, 2925, 2852, 1715, 1659, 1587, 1465, 1394, 1287, 1263, 1162, 1072, 1021, 823, 797, 591, 540, 503.

HRMS (ESI,  $m/z$ ) calcd for  $\text{C}_8\text{H}_8\text{INNaO}_2\text{S}$  ( $\text{M}+\text{Na}$ ) $^+$ : 331.9213, found: 331.9215.

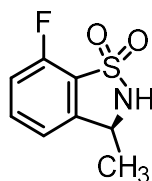

**5h**

A solution of cyclic *N*-sulfonylimine **4h** (39.8 mg, 0.20 mmol),  $\text{HCO}_2\text{NH}_4$  (113.5 mg, 1.80 mmol), and  $\Delta\text{-IrC1a}$  (0.10  $\mu\text{mol}$ , 40  $\mu\text{L}$  of a 2.5 mM stock solution of  $\Delta\text{-IrC1a}$  in DMF) in DMF/ $\text{H}_2\text{O}$  (227  $\mu\text{L}$ /133  $\mu\text{L}$ ) was stirred at 60  $^\circ\text{C}$  for 4 h, cooled down to room temperature, then dried in *vacuo*. The residue was purified by flash chromatography on silica gel ( $\text{CH}_2\text{Cl}_2$ ) to afford product **5h** as a white solid (38.6 mg, 0.192 mmol, yield: 96%). Enantiomeric excess was established by HPLC analysis using a Chiralpak OD-H column, ee = 95% (HPLC: OD-H, 220 nm, *n*-hexane/isopropanol = 90:10, flow rate 0.8 mL/min, 30  $^\circ\text{C}$ ,  $t_r(\text{major})$  = 25.7 min,  $t_r(\text{minor})$  = 30.1 min.  $[\alpha]_{\text{D}}^{25}$  = -16.9 $^\circ$  ( $c$  = 1.0,  $\text{CHCl}_3$ ).

$^1\text{H}$  NMR (500 MHz,  $\text{CDCl}_3$ ):  $\delta$  (ppm) 7.61 (td,  $J$  = 8.0, 4.9 Hz, 1H), 7.16 (t,  $J$  = 7.9 Hz, 2H), 4.86 (s, 1H), 4.82–4.75 (m, 1H), 1.63 (d,  $J$  = 6.7 Hz, 3H).

$^{13}\text{C}$  NMR (126 MHz,  $\text{CDCl}_3$ ):  $\delta$  (ppm) 157.3, 155.3, 145.5, 135.9 (d,  $J$  = 7.2 Hz), 119.6 (d,  $J$  = 4.1 Hz), 116.1 (d,  $J$  = 18.7 Hz), 53.5, 21.3.

IR (film):  $\nu$  ( $\text{cm}^{-1}$ ) 3263, 2959, 2925, 2854, 1611, 1590, 1466, 1377, 1261, 1160, 1097, 1021, 798, 525.

HRMS (ESI,  $m/z$ ) calcd for  $\text{C}_8\text{H}_8\text{FNNaO}_2\text{S}$  ( $\text{M}+\text{Na}$ ) $^+$ : 224.0152, found: 224.0152.

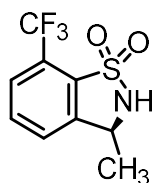

**5i**

A solution of cyclic *N*-sulfonylimine **4i** (49.8 mg, 0.20 mmol), HCO<sub>2</sub>NH<sub>4</sub> (113.5 mg, 1.80 mmol), and Δ-**IrC1a** (0.10 μmol, 40 μL of a 2.5 mM stock solution of Δ-**IrC1a** in DMF) in DMF/H<sub>2</sub>O (227 μL/133 μL) was stirred at 60 °C for 4 h, cooled down to room temperature, then dried in *vacuo*. The residue was purified by flash chromatography on silica gel (CH<sub>2</sub>Cl<sub>2</sub>) to afford product **5i** as a white solid (47.7 mg, 0.190 mmol, yield: 95%). Enantiomeric excess was established by HPLC analysis using a Chiralpak OD-H column, ee = 94% (HPLC: OD-H, 220 nm, *n*-hexane/isopropanol = 90:10, flow rate 0.8 mL/min, 30 °C, t<sub>r</sub>(major) = 8.8 min, t<sub>r</sub>(minor) = 10.1 min. [α]<sub>D</sub><sup>25</sup> = -15.1° (*c* = 1.0, CHCl<sub>3</sub>).

<sup>1</sup>H NMR (500 MHz, CDCl<sub>3</sub>): δ (ppm) 7.79–7.71 (m, 2H), 7.64–7.57 (m, 1H), 4.89 (s, 1H), 4.77 (p, *J* = 6.6 Hz, 1H), 1.66 (d, *J* = 6.8 Hz, 3H).

<sup>13</sup>C NMR (126 MHz, CDCl<sub>3</sub>): δ (ppm) 143.8, 132.4, 126.8, 125.8 (d, *J* = 4.8 Hz), 124.8, 122.4, 120.3, 51.7, 19.8.

IR (film): ν (cm<sup>-1</sup>) 3244, 2915, 1602, 1439, 1395, 1260, 1058, 1018, 796, 713, 671, 636, 562, 516, 474.

HRMS (ESI, *m/z*) calcd for C<sub>9</sub>H<sub>8</sub>F<sub>3</sub>NNaO<sub>2</sub>S (M+Na)<sup>+</sup>: 274.0120, found: 274.0120.

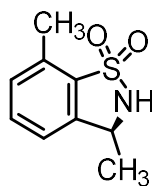

**5j**

A solution of cyclic *N*-sulfonylimine **4j** (39.1 mg, 0.20 mmol), HCO<sub>2</sub>NH<sub>4</sub> (113.5 mg, 1.80 mmol), and Δ-**IrC1a** (0.10 μmol, 40 μL of a 2.5 mM stock solution of Δ-**IrC1a** in DMF) in DMF/H<sub>2</sub>O (227 μL/133 μL) was stirred at 60 °C for 6 h, cooled down to room temperature, then dried in *vacuo*. The residue was purified by flash chromatography on silica gel (CH<sub>2</sub>Cl<sub>2</sub>) to afford product **5j** as a white solid (38.7 mg, 0.196 mmol, yield: 98%). Enantiomeric excess was established by HPLC analysis using a Chiralpak OD-H column, ee = 97% (HPLC: AD-H, 220 nm, *n*-hexane/isopropanol = 92:8, flow rate 0.8 mL/min, 30 °C, t<sub>r</sub>(major) = 22.4 min, t<sub>r</sub>(minor) = 25.2 min. [α]<sub>D</sub><sup>25</sup> = -15.9 (*c* = 1.0, CHCl<sub>3</sub>).

<sup>1</sup>H NMR (500 MHz, CDCl<sub>3</sub>): δ (ppm) 7.49 (t, *J* = 7.6 Hz, 1H), 7.25 (d, *J* = 7.9 Hz, 1H), 7.18 (d, *J* = 7.7 Hz, 1H), 4.82–4.68 (m, 2H), 2.63 (s, 3H), 1.59 (d, *J* = 6.6 Hz, 3H).

<sup>13</sup>C NMR (126 MHz, CDCl<sub>3</sub>): δ (ppm) 142.0, 134.3, 134.1, 133.3, 130.7, 121.2, 52.9, 21.7, 17.0.

IR (film): ν (cm<sup>-1</sup>) 3251, 2963, 2925, 1601, 1473, 1373, 1261, 1155, 1102, 829, 798, 763, 560.

HRMS (ESI, *m/z*) calcd for C<sub>9</sub>H<sub>11</sub>NNaO<sub>2</sub>S (M+Na)<sup>+</sup>: 220.0403, found: 220.0405.

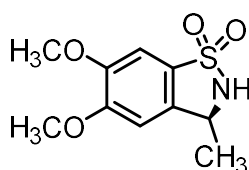

**5k**

A solution of cyclic *N*-sulfonylimine **4k** (48.3 mg, 0.20 mmol), HCO<sub>2</sub>NH<sub>4</sub> (113.5 mg, 1.80 mmol), and Δ-**IrC1a** (0.10 μmol, 40 μL of a 2.5 mM stock solution of Δ-**IrC1a** in DMF) in DMF/H<sub>2</sub>O (227 μL/133

$\mu\text{L}$ ) was stirred at 60 °C for 7.5 h, cooled down to room temperature, then dried in *vacuo*. The residue was purified by flash chromatography on silica gel ( $\text{CH}_2\text{Cl}_2$ ) to afford product **5k** as a white solid (47.7 mg, 0.196 mmol, yield: 98%). Enantiomeric excess was established by HPLC analysis using a Chiralpak OD-H column, ee = 98% (HPLC: OD-H, 254nm, *n*-hexane/isopropanol = 80:20, flow rate 0.7 mL/min, 30 °C,  $t_{\text{r}}(\text{major}) = 23.1$  min,  $t_{\text{r}}(\text{minor}) = 30.6$  min.  $[\alpha]_{\text{D}}^{25} = -15.3^\circ$  ( $c = 1.0$ ,  $\text{CHCl}_3$ ).

$^1\text{H}$  NMR (500 MHz,  $\text{CDCl}_3$ ):  $\delta$  (ppm) 7.17 (s, 1H), 6.73 (s, 1H), 4.76–4.66 (m, 1H), 4.58 (s, 1H), 3.95 (s, 3H), 3.94 (s, 3H), 1.60 (d,  $J = 6.7$  Hz, 3H).

$^{13}\text{C}$  NMR (126 MHz,  $\text{CDCl}_3$ ):  $\delta$  (ppm) 153.9, 150.5, 135.0, 127.1, 105.0, 102.5, 56.45, 56.47, 53.2, 21.9.

IR (film):  $\nu$  ( $\text{cm}^{-1}$ ) 3298, 2962, 2918, 2849, 1593, 1502, 1410, 1375, 1262, 1178, 1052, 800, 515, 493.

HRMS (ESI,  $m/z$ ) calcd for  $\text{C}_{10}\text{H}_{13}\text{NNaO}_4\text{S}$  ( $\text{M}+\text{Na}$ ) $^+$ : 266.0457, found: 266.0461.

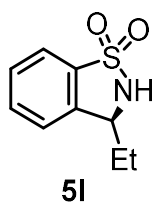

A solution of cyclic *N*-sulfonylimine **4l** (39.1 mg, 0.20 mmol),  $\text{HCO}_2\text{NH}_4$  (113.5 mg, 1.80 mmol), and  $\Delta$ -**IrC1a** (0.10  $\mu\text{mol}$ , 40  $\mu\text{L}$  of a 2.5 mM stock solution of  $\Delta$ -**IrC1a** in DMF) in DMF/ $\text{H}_2\text{O}$  (227  $\mu\text{L}$ /133  $\mu\text{L}$ ) was stirred at 60 °C for 7 h, cooled down to room temperature, then dried in *vacuo*. The residue was purified by flash chromatography on silica gel ( $\text{CH}_2\text{Cl}_2$ ) to afford product **5l** as a white solid (39.1 mg, 0.198 mmol, yield: 99%). Enantiomeric excess was established by HPLC analysis using a Chiralpak OD-H column, ee = 96% (HPLC: OD-H, 254 nm, *n*-hexane/isopropanol = 80:20, flow rate 0.8 mL/min, 30 °C,  $t_{\text{r}}(\text{major}) = 11.8$  min,  $t_{\text{r}}(\text{minor}) = 19.7$  min.  $[\alpha]_{\text{D}}^{25} = -46.7^\circ$  ( $c = 1.0$ ,  $\text{CHCl}_3$ ).

$^1\text{H}$  NMR (500 MHz,  $\text{CDCl}_3$ ):  $\delta$  (ppm) 7.78 (d,  $J = 7.8$  Hz, 1H), 7.63 (td,  $J = 7.7, 1.0$  Hz, 1H), 7.53 (t,  $J = 7.5$  Hz, 1H), 7.39 (d,  $J = 7.8$  Hz, 1H), 4.75–4.62 (m, 2H), 2.01–2.12 (m, 1H), 1.88–1.77 (m, 1H), 1.04 (t,  $J = 7.4$  Hz, 3H).

Other analytic data of **5l** are consistent with the literature.<sup>9</sup>

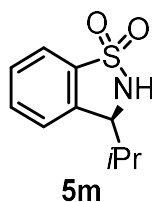

A solution of cyclic *N*-sulfonylimine **4m** (41.9 mg, 0.20 mmol),  $\text{HCO}_2\text{NH}_4$  (113.5 mg, 1.80 mmol), and  $\Delta$ -**IrC1a** (0.40  $\mu\text{mol}$ , 160  $\mu\text{L}$  of a 2.5 mM stock solution of  $\Delta$ -**IrC1a** in DMF) in DMF/ $\text{H}_2\text{O}$  (107  $\mu\text{L}$ /133  $\mu\text{L}$ ) was stirred at 60 °C for 8 h, cooled down to room temperature, then dried in *vacuo*. The residue was purified by flash chromatography on silica gel ( $\text{CH}_2\text{Cl}_2$ ) to afford product **5m** as a white solid (41.8 mg, 0.198 mmol, yield: 99%). Enantiomeric excess was established by HPLC analysis using a Chiralpak OD-H column, ee = 94% (HPLC: OD-H, 254 nm, *n*-hexane/isopropanol = 80:20, flow rate 0.8 mL/min, 30 °C,  $t_{\text{r}}(\text{major}) = 9.7$  min,  $t_{\text{r}}(\text{minor}) = 23.4$  min.  $[\alpha]_{\text{D}}^{25} = -61.9^\circ$  ( $c = 1.0$ ,  $\text{CHCl}_3$ ).

$^1\text{H}$  NMR (500 MHz,  $\text{CDCl}_3$ ):  $\delta$  (ppm) 7.79 (d,  $J = 7.8$  Hz, 1H), 7.63 (td,  $J = 7.7, 0.9$  Hz, 1H), 7.54 (t,  $J = 7.6$  Hz, 1H), 7.38 (d,  $J = 7.6$  Hz, 1H), 4.71–4.66 (m, 1H), 4.62 (s, 1H), 2.36–2.22 (m, 1H), 1.14 (d,  $J = 6.9$  Hz, 3H), 0.78 (d,  $J = 6.8$  Hz, 3H).

Other analytic data of **5m** are consistent with the literature.<sup>9</sup>

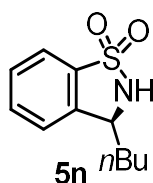

A solution of cyclic *N*-sulfonylimine **4n** (44.7 mg, 0.20 mmol), HCO<sub>2</sub>NH<sub>4</sub> (113.5 mg, 1.80 mmol), and  $\Delta$ -**IrC1a** (0.40  $\mu$ mol, 160  $\mu$ L of a 2.5 mM stock solution of  $\Delta$ -**IrC1a** in DMF) in DMF/H<sub>2</sub>O (107  $\mu$ L/133  $\mu$ L) was stirred at 60 °C for 3 h, cooled down to room temperature, then dried in *vacuo*. The residue was purified by flash chromatography on silica gel (CH<sub>2</sub>Cl<sub>2</sub>) to afford product **5n** as a white solid (44.6 mg, 0.198 mmol, yield: 99%). Enantiomeric excess was established by HPLC analysis using a Chiralpak OD-H column, ee = 98% (HPLC: OD-H, 254 nm, *n*-hexane/isopropanol = 80:20, flow rate 0.8 mL/min, 30 °C,  $t_r$ (major) = 9.5 min,  $t_r$ (minor) = 17.7 min.  $[\alpha]_D^{25} = -46.3^\circ$  ( $c = 1.0$ , CHCl<sub>3</sub>).

<sup>1</sup>H NMR (500 MHz, CDCl<sub>3</sub>):  $\delta$  (ppm) 7.71 (d,  $J = 7.8$  Hz, 1H), 7.59–7.51 (m, 1H), 7.46 (t,  $J = 7.5$  Hz, 1H), 7.32 (d,  $J = 7.8$  Hz, 1H), 4.62–4.72 (m, 2H), 2.02–1.86 (m, 1H), 1.93–2.09 (m, 1H), 1.73–1.82 (m, 4H), 0.86 (t,  $J = 7.1$  Hz, 3H).

Other analytic data of **5n** are consistent with the literature.<sup>7</sup>

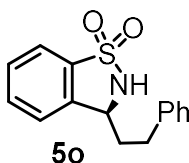

A solution of cyclic *N*-sulfonylimine **4o** (54.7 mg, 0.20 mmol), HCO<sub>2</sub>NH<sub>4</sub> (113.5 mg, 1.80 mmol), and  $\Delta$ -**IrC1a** (0.40  $\mu$ mol, 160  $\mu$ L of a 2.5 mM stock solution of  $\Delta$ -**IrC1a** in DMF) in DMF/H<sub>2</sub>O (107  $\mu$ L/133  $\mu$ L) was stirred at 60 °C for 4 h, cooled down to room temperature, then dried in *vacuo*. The residue was purified by flash chromatography on silica gel (CH<sub>2</sub>Cl<sub>2</sub>) to afford product **5o** as a white solid (53.6 mg, 0.196 mmol, yield: 98%). Enantiomeric excess was established by HPLC analysis using a Chiralpak OD-H column, ee = 96% (HPLC: OD-H, 220 nm, *n*-hexane/isopropanol = 80:20, flow rate 0.7 mL/min, 30 °C,  $t_r$ (major) = 24.8 min,  $t_r$ (minor) = 45.9 min.  $[\alpha]_D^{20} = -33.0^\circ$  ( $c = 1.0$ , CHCl<sub>3</sub>).

<sup>1</sup>H NMR (500 MHz, CDCl<sub>3</sub>):  $\delta$  (ppm) 7.80–7.75 (m, 1H), 7.61 (td,  $J = 7.6, 1.1$  Hz, 1H), 7.52 (t,  $J = 7.5$  Hz, 1H), 7.36 (dd,  $J = 7.8, 0.5$  Hz, 1H), 7.33–7.28 (m, 2H), 7.24–7.18 (m, 3H), 4.82 (s, 1H), 4.73–4.65 (m, 1H), 2.83 (t,  $J = 7.7$  Hz, 2H), 2.34–2.24 (m, 1H), 2.15–2.05 (m, 1H).

Other analytic data of **5o** are consistent with the literature.<sup>5d</sup>

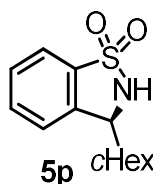

A solution of cyclic *N*-sulfonylimine **4p** (33.2 mg, 0.20 mmol), HCO<sub>2</sub>NH<sub>4</sub> (113.5 mg, 1.80 mmol), and  $\Delta$ -**IrC1a** (0.40  $\mu$ mol, 160  $\mu$ L of a 2.5 mM stock solution of  $\Delta$ -**IrC1a** in DMF) in DMF/H<sub>2</sub>O (107  $\mu$ L/133  $\mu$ L) was stirred at 60 °C for 9 h, cooled down to room temperature, then dried in *vacuo*. The residue was purified by flash chromatography on silica gel (CH<sub>2</sub>Cl<sub>2</sub>) to afford product **5p** as a white solid (33.0 mg, 0.196 mmol, yield: 98%). Enantiomeric excess was established by HPLC analysis using a Chiralpak OD-H column, ee = 97% (HPLC: OD-H, 254 nm, *n*-hexane/isopropanol = 80:20, flow rate 0.7 mL/min, 30 °C,  $t_r$ (major) = 11.2 min,  $t_r$ (minor) = 33.0 min.  $[\alpha]_D^{25} = -48.6^\circ$  ( $c = 1.0$ , CHCl<sub>3</sub>).

<sup>1</sup>H NMR (500 MHz, CDCl<sub>3</sub>):  $\delta$  (ppm) 7.78 (d,  $J = 7.8$  Hz, 1H), 7.65–7.60 (m, 1H), 7.53 (t,  $J = 7.5$  Hz, 1H), 7.39 (d,  $J = 7.8$  Hz, 1H), 4.63 (br, 2H), 1.93–1.65 (m, 2H), 1.28–1.12 (m, 6H).

Other analytic data of **5p** are consistent with the literature.<sup>9</sup>

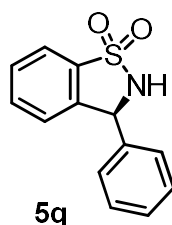

A solution of cyclic *N*-sulfonylimine **4q** (48.7 mg, 0.20 mmol), HCO<sub>2</sub>NH<sub>4</sub> (113.5 mg, 1.80 mmol), and  $\Delta$ -**IrC1a** (0.40  $\mu$ mol, 160  $\mu$ L of a 2.5 mM stock solution of  $\Delta$ -**IrC1a** in DMF) in DMF/H<sub>2</sub>O (107  $\mu$ L/133  $\mu$ L) was stirred at 60 °C for 4 h, cooled down to room temperature, then dried in *vacuo*. The residue was purified by flash chromatography on silica gel (CH<sub>2</sub>Cl<sub>2</sub>) to afford product **5q** as a white solid (47.6 mg, 0.194 mmol, yield: 97%). Enantiomeric excess was established by HPLC analysis using a Chiralpak OD-H column, ee = 97% (HPLC: OD-H, 254 nm, *n*-hexane/isopropanol = 70:30, flow rate 0.8 mL/min, 30 °C, *t*<sub>r</sub>(major) = 16.5 min, *t*<sub>r</sub>(minor) = 18.6 min. [ $\alpha$ ]<sub>D</sub><sup>25</sup> = 84.8° (*c* = 1.0, CHCl<sub>3</sub>).

<sup>1</sup>H NMR (500 MHz, CDCl<sub>3</sub>):  $\delta$  (ppm) 7.86–7.82 (m, 1H), 7.59–7.51 (m, 2H), 7.44–7.35 (m, 5H), 7.16–7.13 (m, 1H), 5.72 (d, *J* = 3.8 Hz, 1H), 4.89 (br, 1H).

Other analytic data of **5q** are consistent with the literature.<sup>6</sup>

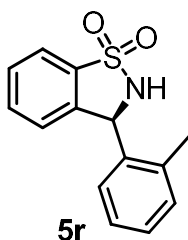

A solution of cyclic *N*-sulfonylimine **4r** (51.5 mg, 0.20 mmol), HCO<sub>2</sub>NH<sub>4</sub> (113.5 mg, 1.80 mmol), and  $\Delta$ -**IrC1a** (0.40  $\mu$ mol, 160  $\mu$ L of a 2.5 mM stock solution of  $\Delta$ -**IrC1a** in DMF) in DMF/H<sub>2</sub>O (107  $\mu$ L/133  $\mu$ L) was stirred at 60 °C for 4 h, cooled down to room temperature, then dried in *vacuo*. The residue was purified by flash chromatography on silica gel (CH<sub>2</sub>Cl<sub>2</sub>) to afford product **5r** as a white solid (50.3 mg, 0.194 mmol, yield: 97%). Enantiomeric excess was established by HPLC analysis using a Chiralpak OD-H column, ee = 98% (HPLC: OD-H, 254 nm, *n*-hexane/isopropanol = 70:30, flow rate 0.8 mL/min, 30 °C, *t*<sub>r</sub>(major) = 12.7 min, *t*<sub>r</sub>(minor) = 15.1 min. [ $\alpha$ ]<sub>D</sub><sup>25</sup> = 7.9° (*c* = 1.0, CHCl<sub>3</sub>).

<sup>1</sup>H NMR (500 MHz, CDCl<sub>3</sub>):  $\delta$  (ppm) 7.88–7.84 (m, 1H), 7.61–7.54 (m, 2H), 7.30–7.26 (m, 1H), 7.22–7.16 (m, 1H), 7.15–7.09 (m, 2H), 6.00 (d, *J* = 4.4 Hz, 1H), 4.70 (br, 1H), 2.46 (s, 3H).

Other analytic data of **5r** are consistent with the literature.<sup>6</sup>

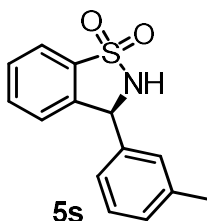

A solution of cyclic *N*-sulfonylimine **4s** (51.5 mg, 0.20 mmol), HCO<sub>2</sub>NH<sub>4</sub> (113.5 mg, 1.80 mmol), and  $\Delta$ -**IrC1a** (0.40  $\mu$ mol, 160  $\mu$ L of a 2.5 mM stock solution of  $\Delta$ -**IrC1a** in DMF) in DMF/H<sub>2</sub>O (107  $\mu$ L/133  $\mu$ L) was stirred at 60 °C for 3 h, cooled down to room temperature, then dried in *vacuo*. The residue was purified by flash chromatography on silica gel (CH<sub>2</sub>Cl<sub>2</sub>) to afford product **5s** as a white solid (49.3 mg, 0.190 mmol, yield: 95%). Enantiomeric excess was established by HPLC analysis using a Chiralpak AD-H column, ee = 97% (HPLC: AD-H, 254 nm, *n*-hexane/isopropanol = 90:10, flow rate 0.8 mL/min, 30 °C, *t*<sub>r</sub>(minor) = 25.2 min, *t*<sub>r</sub>(major) = 29.6 min. [ $\alpha$ ]<sub>D</sub><sup>25</sup> = 77.7° (*c* = 1.0, CHCl<sub>3</sub>).

$^1\text{H}$  NMR (500 MHz,  $\text{CDCl}_3$ ):  $\delta$  (ppm) 7.89–7.80 (m, 1H), 7.59–7.51 (m, 2H), 7.33–7.27 (m, 1H), 7.22–7.10 (m, 4H), 5.68 (d,  $J = 4.0$  Hz, 1H), 4.81 (br, 1H), 2.35 (s, 3H).

Other analytic data of **5s** are consistent with the literature.<sup>6</sup>

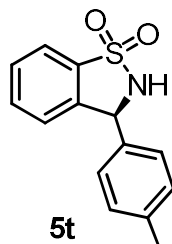

A solution of cyclic *N*-sulfonylimine **4t** (51.5 mg, 0.20 mmol),  $\text{HCO}_2\text{NH}_4$  (113.5 mg, 1.80 mmol), and  $\Delta$ -**IrC1a** (0.40  $\mu\text{mol}$ , 160  $\mu\text{L}$  of a 2.5 mM stock solution of  $\Delta$ -**IrC1a** in DMF) in DMF/ $\text{H}_2\text{O}$  (107  $\mu\text{L}$ /133  $\mu\text{L}$ ) was stirred at 60  $^\circ\text{C}$  for 4 h, cooled down to room temperature, then dried in *vacuo*. The residue was purified by flash chromatography on silica gel ( $\text{CH}_2\text{Cl}_2$ ) to afford product **5t** as a white solid (50.4 mg, 0.194 mmol, yield: 97%). Enantiomeric excess was established by HPLC analysis using a Chiralpak OD-H column, ee = 98% (HPLC: OD-H, 254 nm, *n*-hexane/isopropanol = 70:30, flow rate 0.8 mL/min, 30  $^\circ\text{C}$ ,  $t_r(\text{minor}) = 19.7$  min,  $t_r(\text{major}) = 24.5$  min.  $[\alpha]_{\text{D}}^{25} = 68.5^\circ$  ( $c = 1.0$ ,  $\text{CHCl}_3$ ).

$^1\text{H}$  NMR (500 MHz,  $\text{CDCl}_3$ ):  $\delta$  (ppm) 7.85–7.81 (m, 1H), 7.58–7.51 (m, 2H), 7.26–7.22 (m, 2H), 7.19 (d,  $J = 8.0$  Hz, 2H), 7.15–7.11 (m, 1H), 5.68 (d,  $J = 4.1$  Hz, 1H), 4.84 (br, 1H), 2.36 (s, 3H).

Other analytic data of **5t** are consistent with the literature.<sup>6</sup>

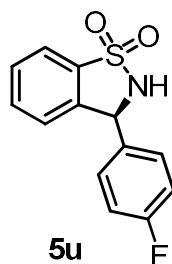

A solution of cyclic *N*-sulfonylimine **4u** (52.3 mg, 0.20 mmol),  $\text{HCO}_2\text{NH}_4$  (113.5 mg, 1.80 mmol), and  $\Delta$ -**IrC1a** (0.40  $\mu\text{mol}$ , 160  $\mu\text{L}$  of a 2.5 mM stock solution of  $\Delta$ -**IrC1a** in DMF) in DMF/ $\text{H}_2\text{O}$  (107  $\mu\text{L}$ /133  $\mu\text{L}$ ) was stirred at 60  $^\circ\text{C}$  for 4 h, cooled down to room temperature, then dried in *vacuo*. The residue was purified by flash chromatography on silica gel ( $\text{CH}_2\text{Cl}_2$ ) to afford product **5u** as a white solid (51.6 mg, 0.196 mmol, yield: 97%). Enantiomeric excess was established by HPLC analysis using a Chiralpak OD-H column, ee = 98% (HPLC: OD-H, 254 nm, *n*-hexane/isopropanol = 70:30, flow rate 0.8 mL/min, 30  $^\circ\text{C}$ ,  $t_r(\text{major}) = 11.4$  min,  $t_r(\text{minor}) = 17.6$  min.  $[\alpha]_{\text{D}}^{25} = 87.9^\circ$  ( $c = 1.0$ ,  $\text{CHCl}_3$ ).

$^1\text{H}$  NMR (500 MHz,  $\text{CDCl}_3$ ):  $\delta$  (ppm) 7.87–7.82 (m, 1H), 7.62–7.51 (m, 2H), 7.39–7.32 (m, 2H), 7.17–7.03 (m, 3H), 5.72 (d,  $J = 4.2$  Hz, 1H), 4.93 (br, 1H).

Other analytic data of **5u** are consistent with the literature.<sup>6</sup>

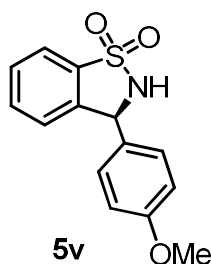



A solution of cyclic *N*-sulfonylimine **4v** (54.7 mg, 0.20 mmol), HCO<sub>2</sub>NH<sub>4</sub> (113.5 mg, 1.80 mmol), and  $\Delta$ -**IrC1a** (0.40  $\mu$ mol, 160  $\mu$ L of a 2.5 mM stock solution of  $\Delta$ -**IrC1a** in DMF) in DMF/H<sub>2</sub>O (107  $\mu$ L/133  $\mu$ L) was stirred at 60 °C for 3 h, cooled down to room temperature, then dried in *vacuo*. The residue was purified by flash chromatography on silica gel (CH<sub>2</sub>Cl<sub>2</sub>) to afford product **5v** as a white solid (53.4 mg, 0.194 mmol, yield: 97%). Enantiomeric excess was established by HPLC analysis using a Chiralpak OD-H column, ee = 98% (HPLC: OD-H, 254 nm, *n*-hexane/isopropanol = 70:30, flow rate 0.8 mL/min, 30 °C, *t*<sub>r</sub>(major) = 22.1 min, *t*<sub>r</sub>(minor) = 30.9 min. [ $\alpha$ ]<sub>D</sub><sup>25</sup> = 56.5° (*c* = 1.0, CHCl<sub>3</sub>).

<sup>1</sup>H NMR (500 MHz, CDCl<sub>3</sub>):  $\delta$  (ppm) 7.86–7.81 (m, 1H), 7.60–7.51 (m, 2H), 7.29–7.26 (m, 1H), 7.26–7.24 (m, 1H), 7.16–7.11 (m, 1H), 6.95–6.86 (m, 2H), 5.68 (d, *J* = 4.0 Hz, 1H), 4.79 (d, *J* = 3.3 Hz, 1H), 3.81 (s, 3H).

Other analytic data of **5v** are consistent with the literature.<sup>5d</sup>

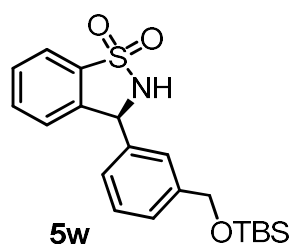

A solution of cyclic *N*-sulfonylimine **4w** (77.8 mg, 0.20 mmol), HCO<sub>2</sub>NH<sub>4</sub> (113.5 mg, 1.80 mmol), and  $\Delta$ -**IrC1a** (0.40  $\mu$ mol, 160  $\mu$ L of a 2.5 mM stock solution of  $\Delta$ -**IrC1a** in DMF) in DMF/H<sub>2</sub>O (107  $\mu$ L/133  $\mu$ L) was stirred at 60 °C for 4 h, cooled down to room temperature, then dried in *vacuo*. The residue was purified by flash chromatography on silica gel (EtOAc) to afford product **5w** as a white solid (77.2 mg, 0.198 mmol, yield: 99%). Enantiomeric excess was established by HPLC analysis using a Chiralpak OD-H column, ee = 96% (HPLC: OD-H, 254 nm, *n*-hexane/isopropanol = 70:30, flow rate 0.8 mL/min, 30 °C, *t*<sub>r</sub>(major) = 7.3 min, *t*<sub>r</sub>(minor) = 8.2 min. [ $\alpha$ ]<sub>D</sub><sup>25</sup> = 60.6° (*c* = 1.0, CHCl<sub>3</sub>).

<sup>1</sup>H NMR (500 MHz, CDCl<sub>3</sub>):  $\delta$  (ppm) 7.86–7.81 (m, 1H), 7.57–7.53 (m, 2H), 7.40–7.29 (m, 3H), 7.25–7.22 (m, 1H), 7.16–7.09 (m, 1H), 5.72 (d, *J* = 4.1 Hz, 1H), 4.88 (d, *J* = 3.9 Hz, 1H), 4.73 (s, 2H), 0.91 (s, 9H), 0.08 (s, 6H).

Other analytic data of **5w** are consistent with the literature.<sup>6</sup>

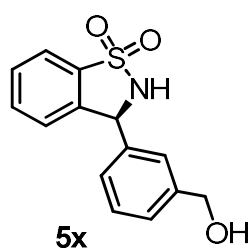

A solution of cyclic *N*-sulfonylimine **4x** (54.7 mg, 0.20 mmol), HCO<sub>2</sub>NH<sub>4</sub> (113.5 mg, 1.80 mmol), and  $\Delta$ -**IrC1a** (0.40  $\mu$ mol, 160  $\mu$ L of a 2.5 mM stock solution of  $\Delta$ -**IrC1a** in DMF) in DMF/H<sub>2</sub>O (107  $\mu$ L/133  $\mu$ L) was stirred at 60 °C for 4 h, cooled down to room temperature, then dried in *vacuo*. The residue was purified by flash chromatography on silica gel (EtOAc) to afford product **5x** as a white solid (54.0 mg, 0.196 mmol, yield: 98%). Enantiomeric excess was established by HPLC analysis using a Chiralpak OD-H column, ee = 97% (HPLC: OD-H, 220 nm, *n*-hexane/isopropanol = 70:30, flow rate 0.8 mL/min, 30 °C, *t*<sub>r</sub>(major) = 16.3 min, *t*<sub>r</sub>(minor) = 26.4 min. [ $\alpha$ ]<sub>D</sub><sup>25</sup> = 84.0° (*c* = 1.0, CHCl<sub>3</sub>).

<sup>1</sup>H NMR (500 MHz, CDCl<sub>3</sub>):  $\delta$  (ppm) 7.87–7.81 (m, 1H), 7.60–7.51 (m, 2H), 7.43–7.35 (m, 3H), 7.32–7.28 (m, 1H), 7.18–7.12 (m, 1H), 5.73 (s, 1H), 4.92 (br, 1H), 4.71 (s, 2H), 1.80 (br, 1H).

Other analytic data of **5x** are consistent with the literature.<sup>6</sup>

## 5. Synthetic Utility of the Method

### 5.1 Conversion to the Chiral Diarylmethylamine **8**

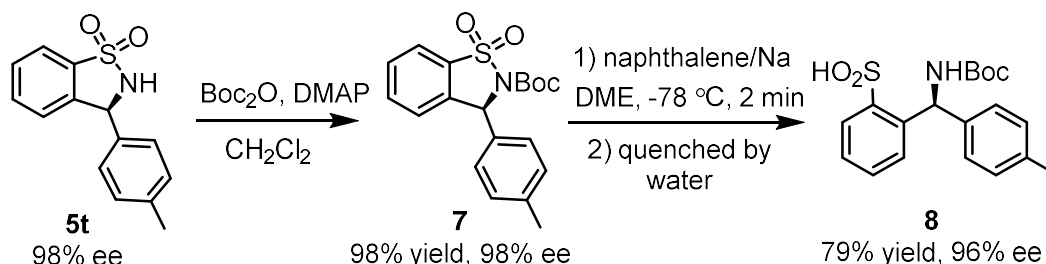

**Scheme S10.** Preparation of the chiral diaryl amine **8**.

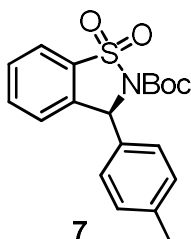

A solution of **5t** (100 mg, 0.39 mmol, 98% ee), 4-dimethylaminopyridine (9.4 mg, 0.077 mmol) in  $\text{CH}_2\text{Cl}_2$  (4 mL) was added di-*tert*-butyl dicarbonate ( $\text{Boc}_2\text{O}$ , 168 mg, 0.77 mmol) at room temperature. The mixture was stirred for 5 h. The solvent was removed under reduced pressure and the residue was purified by flash chromatography on silica gel ( $\text{CH}_2\text{Cl}_2$ ) to afford product **7** as a white solid (137 mg, 0.381 mmol, yield: 98%). Enantiomeric excess was established by HPLC analysis using a Chiralpak OD-H column, ee = 98% (HPLC: OD-H, 254 nm, *n*-hexane/isopropanol = 70:30, flow rate 0.8 mL/min, 30 °C,  $t_r(\text{major}) = 5.8$  min,  $t_r(\text{minor}) = 6.3$  min.  $[\alpha]_{\text{D}}^{25} = 145.4^\circ$  ( $c = 1.0$ ,  $\text{CHCl}_3$ ).

$^1\text{H}$  NMR (500 MHz,  $\text{CD}_2\text{Cl}_2$ ):  $\delta$  (ppm) 7.81 (dd,  $J = 9.0, 7.6$  Hz, 1H), 7.62–7.53 (m, 2H), 7.27 (d,  $J = 8.1$  Hz, 2H), 7.19 (d,  $J = 7.8$  Hz, 3H), 6.01 (s, 1H), 2.34 (s, 3H), 1.43 (s, 9H).

$^{13}\text{C}$  NMR (126 MHz,  $\text{CD}_2\text{Cl}_2$ ):  $\delta$  (ppm) 149.4, 138.9, 136.7, 135.9, 134.3, 133.6, 130.1, 130.0, 127.0, 125.8, 121.6, 84.9, 63.4, 28.1, 21.2.

IR (film):  $\nu$  ( $\text{cm}^{-1}$ ) 3077, 2979, 2922, 1723, 1587, 1488, 1329, 1195, 1181, 1021, 838, 702, 564.

HRMS (ESI,  $m/z$ ) calcd for  $\text{C}_{19}\text{H}_{21}\text{NNaO}_4\text{S}$  ( $\text{M}+\text{Na}$ ) $^+$ : 382.1083, found: 382.1091.

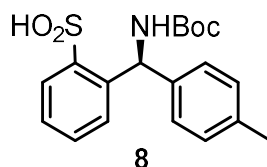

To a solution of **7** (75 mg, 0.21 mmol) in dimethoxyethane (DME, 4 mL) at  $-78\text{ }^\circ\text{C}$  was added dropwise Sodium naphthalide (0.5 M in DME, 4.2 mL, 2.1 mmol). After stirring for 2 min at  $-78\text{ }^\circ\text{C}$ , the reaction was diluted with  $\text{CH}_2\text{Cl}_2$  (5 mL), then quenched with water (0.5 mL). The organic solvents were collected and evaporated. The residue was purified by flash chromatography on silica gel ( $\text{CH}_2\text{Cl}_2/\text{MeOH} = 30/1$  to 10/1) to give the product **8** as a white solid (59.8 mg, 0.165 mmol, yield: 79%). Enantiomeric excess was established by HPLC analysis using a Chiralpak IC column, ee = 96% (HPLC: IC, 220 nm, 0.1% TFA/ $\text{CH}_3\text{CN} = 50:50$ , flow rate 0.5 mL/min, 30 °C,  $t_r(\text{minor}) = 9.7$  min,  $t_r(\text{major}) = 11.5$  min.  $[\alpha]_{\text{D}}^{25} = -44.6^\circ$  ( $c = 1.0$ ,  $\text{CHCl}_3$ ).

$^1\text{H}$  NMR (500 MHz,  $\text{CD}_2\text{Cl}_2$ ):  $\delta$  (ppm) 7.75 (s, 1H), 7.28 (s, 2H), 7.04 (dd,  $J = 44.0, 7.1$  Hz, 6H), 6.70 (s, 1H), 5.60 (s, 1H), 2.25 (s, 3H), 1.23 (s, 9H).

$^{13}\text{C}$  NMR (151 MHz,  $\text{CD}_2\text{Cl}_2$ ):  $\delta$  (ppm) 155.9, 142.0, 140.5, 139.2, 136.9, 131.0, 129.1, 128.5, 128.3, 127.7, 127.4, 81.1, 30.1, 28.4, 21.1.

IR (film):  $\nu$  ( $\text{cm}^{-1}$ ) 3428, 2975, 2925, 2853, 1699, 1501, 1167, 1021, 760, 616, 572.

HRMS (ESI,  $m/z$ ) calcd for  $\text{C}_{19}\text{H}_{23}\text{NNaO}_4\text{S}$  ( $\text{M}+\text{Na}$ ) $^+$ : 384.1240, found: 384.1250.

## 5.2 Half-a-Gram Synthesis of the Bioactive Sultam **9**

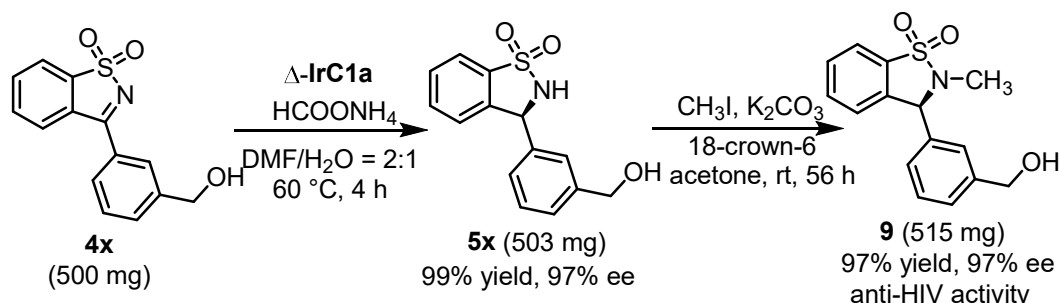

**Scheme S11.** Preparation of bioactive sultam **9** at half a gram-scale.

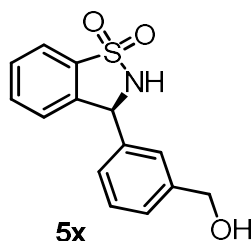

A solution of cyclic *N*-sulfonylimine **4x** (500 mg, 1.83 mmol),  $\text{HCO}_2\text{NH}_4$  (1.04 g, 16.46 mmol), and  $\Delta\text{-IrC1a}$  (9.1 mg, 0.00915 mmol) in  $\text{DMF}/\text{H}_2\text{O}$  (2.44 mL/1.22 mL) was stirred at 60 °C for 4 h, cooled down to room temperature, then dried *in vacuo*. The residue was purified by flash chromatography on silica gel ( $\text{EtOAc}$ ) to afford product **5x** as a white solid (503 mg, 1.827 mmol, yield: 99%). Enantiomeric excess was established by HPLC analysis using a Chiralpak OD-H column, ee = 97% (HPLC: OD-H, 220 nm, *n*-hexane/isopropanol = 70:30, flow rate 0.8 mL/min, 30 °C,  $t_r(\text{major})$  = 15.7 min,  $t_r(\text{minor})$  = 24.4 min).

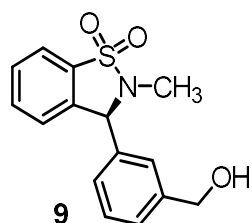

Methylation of the chiral sultam was performed by a literature procedure.<sup>6</sup> Accordingly, a mixture of **5x** (503 mg, 1.827 mmol), iodomethane (312 mg, 2.20 mmol), dried potassium carbonate (329 mg, 2.38 mmol), and 18-crown-6 (48.0 mg, 0.18 mmol) in dry acetone (18 mL) was stirred at room temperature under nitrogen for 56 h. The mixture was evaporated to dryness and purified by flash chromatography on silica gel ( $\text{EtOAc}$ ) to afford product **9** as a white solid (515 mg, 1.78 mmol, yield: 97%). Enantiomeric excess was established by HPLC analysis using a Chiralpak OD-H column, ee = 97% (HPLC: OD-H, 220 nm, *n*-hexane/isopropanol = 70:30, flow rate 0.8 mL/min, 30 °C,  $t_r(\text{major})$  = 9.5 min,  $t_r(\text{minor})$  = 12.1 min.  $[\alpha]_{\text{D}}^{23}$  = 96.9° ( $c$  = 1.0,  $\text{CHCl}_3$ ).

$^1\text{H}$  NMR (500 MHz,  $\text{CDCl}_3$ ):  $\delta$  (ppm) 7.89–7.83 (m, 1H), 7.57–7.48 (m, 2H), 7.44–7.38 (m, 2H), 7.33 (s, 1H), 7.29–7.26 (m, 1H), 7.06–7.02 (m, 1H), 5.20 (br, 1H), 4.72 (s, 2H), 2.78 (s, 3H), 1.80 (br, 1H).

Other analytic data of **9** are consistent with the literature.<sup>6</sup>

## 6. Chiral Chromatography

### 6.1 Determination of Enantiopurities of the Iridium NHC Catalysts

The analysis was performed with a Daicel Chiralpak IB (250 x 4.6 mm) HPLC column on an Agilent 1260 Series HPLC System. The column temperature was 20 °C and UV-absorption was measured at 254 nm.

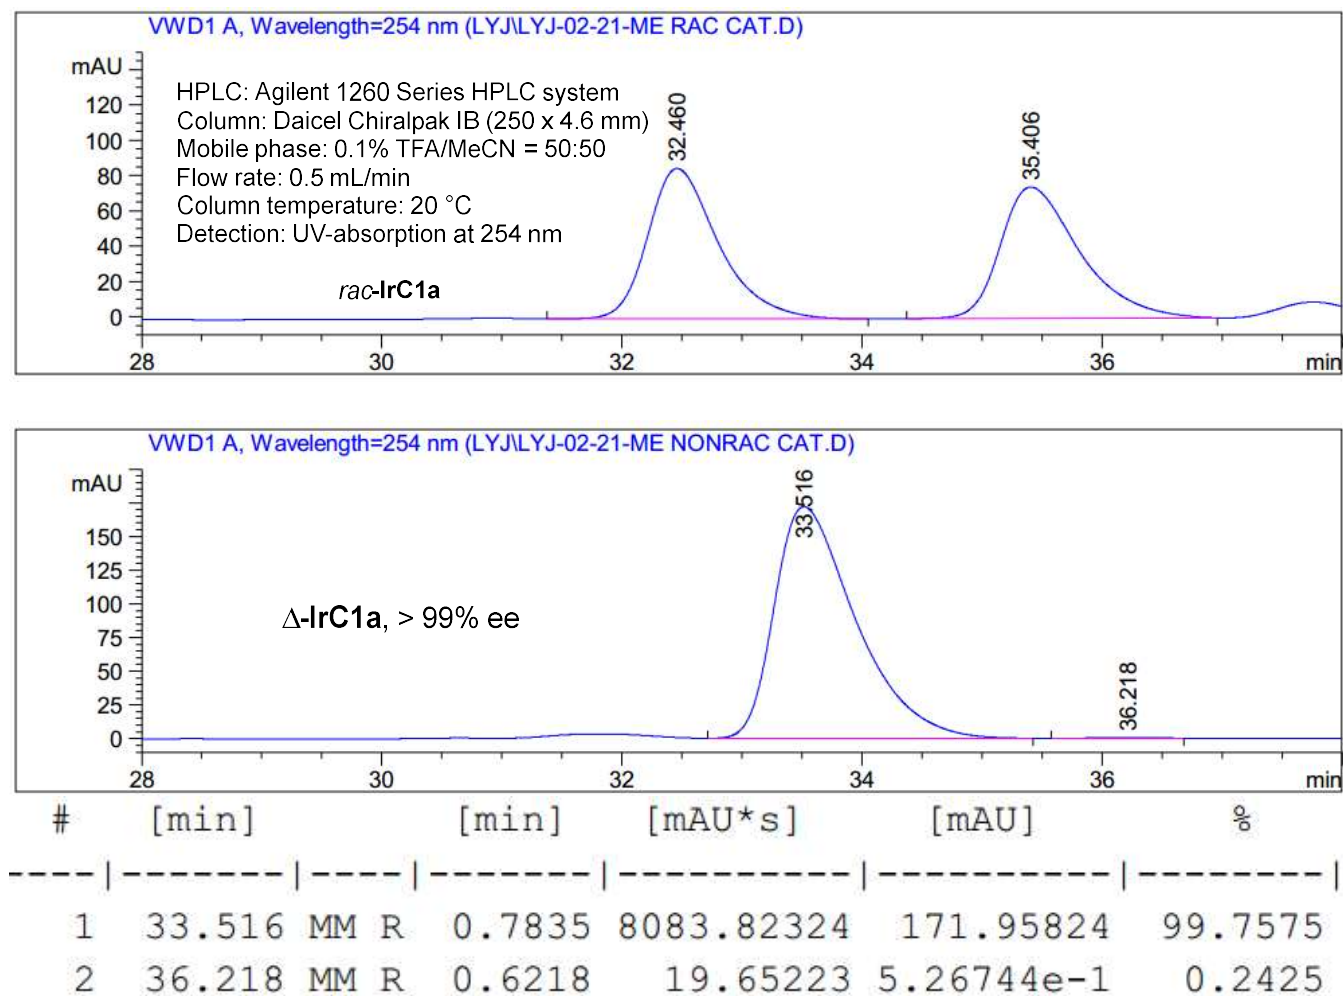

Figure S5. HPLC trace for the racemic reference *rac*-IrC1a, and  $\Delta$ -IrC1a.

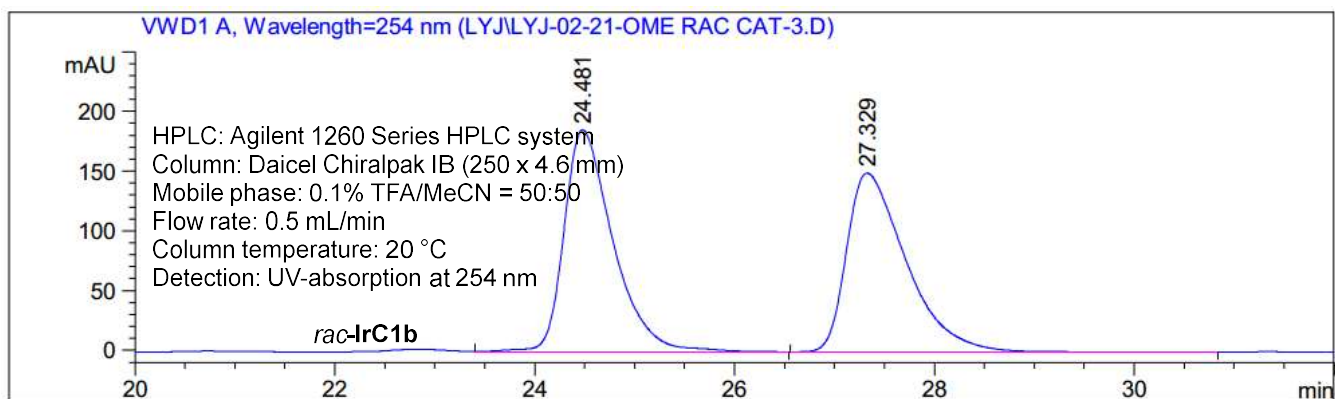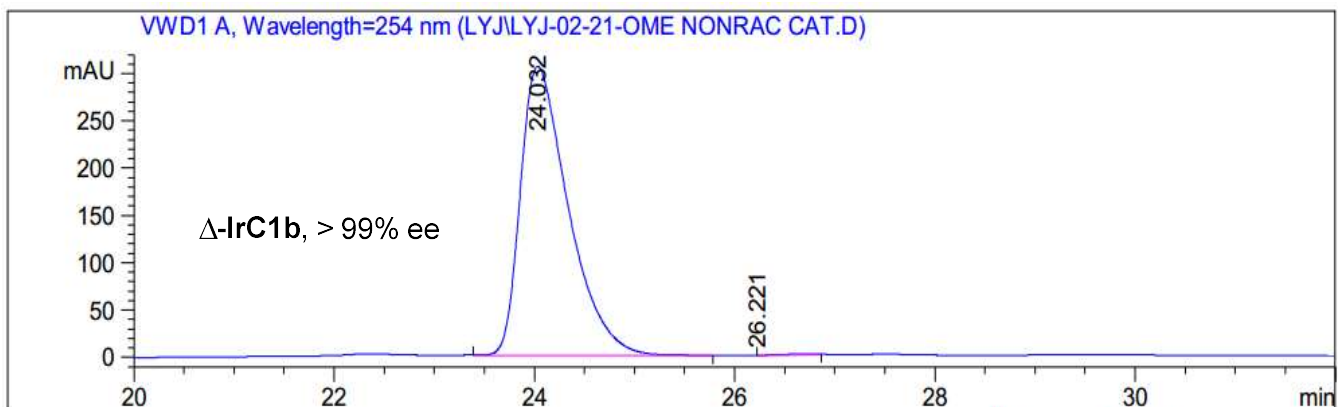

| # | [min]  | [min] | [mAU*s] | [mAU]     | %          | #       | [min] | [r     |      |    |
|---|--------|-------|---------|-----------|------------|---------|-------|--------|------|----|
| 1 | 24.032 | MM R  | 0.5532  | 1.01379e4 | 305.43683  | 99.7116 | 1     | 24.032 | MM R | 0. |
| 2 | 26.221 | MM R  | 0.4105  | 29.32166  | 1.17397e-1 | 0.2884  | 2     | 26.221 | MM R | 0. |

**Figure S6.** HPLC trace for the racemic reference *rac*-IrC1b, and  $\Delta$ -IrC1b.

## 6.2 Determination of Enantioselectivities of the ATH of Cyclic N-Sulfonylimines

Optical purities of the compounds **5a-x** were determined with a Daicel Chiralpak OD-H or AD-H HPLC column on an Agilent 1260 Series HPLC System. The column temperature was 30 °C and UV-absorption was measured at 220 nm or 254 nm.

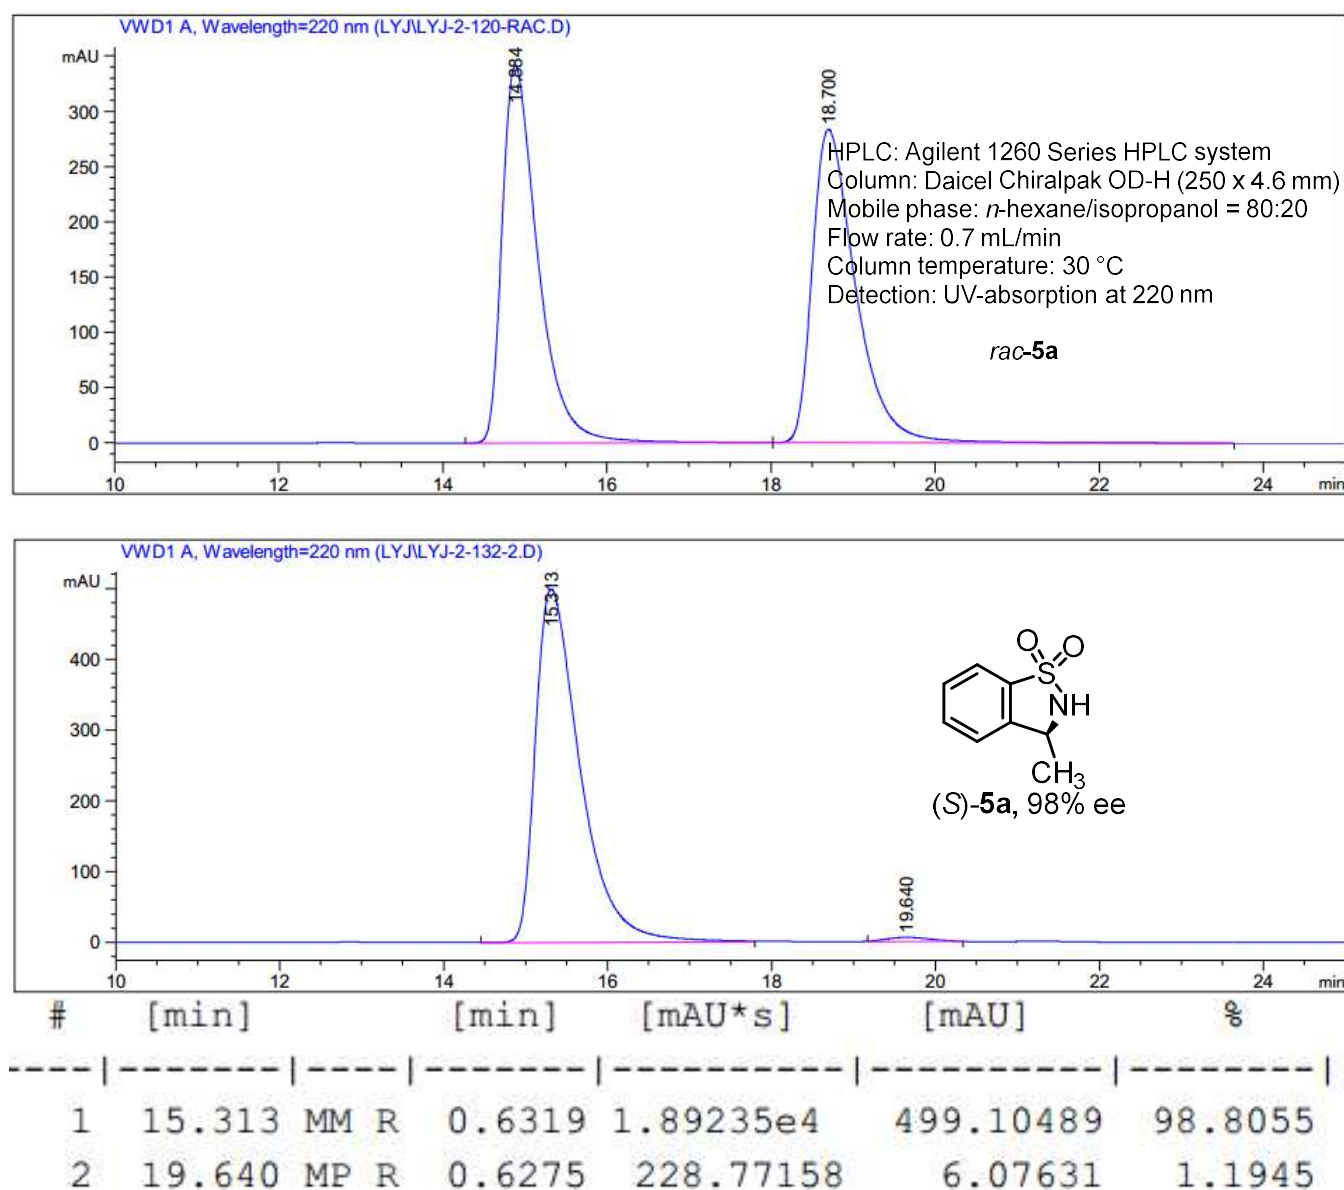

**Figure S7.** HPLC trace for the racemic reference *rac*-**5a**, and non-racemic product (*S*)-**5a** generated from the asymmetric reaction catalyzed by  $\Delta$ -**IrC1a**.

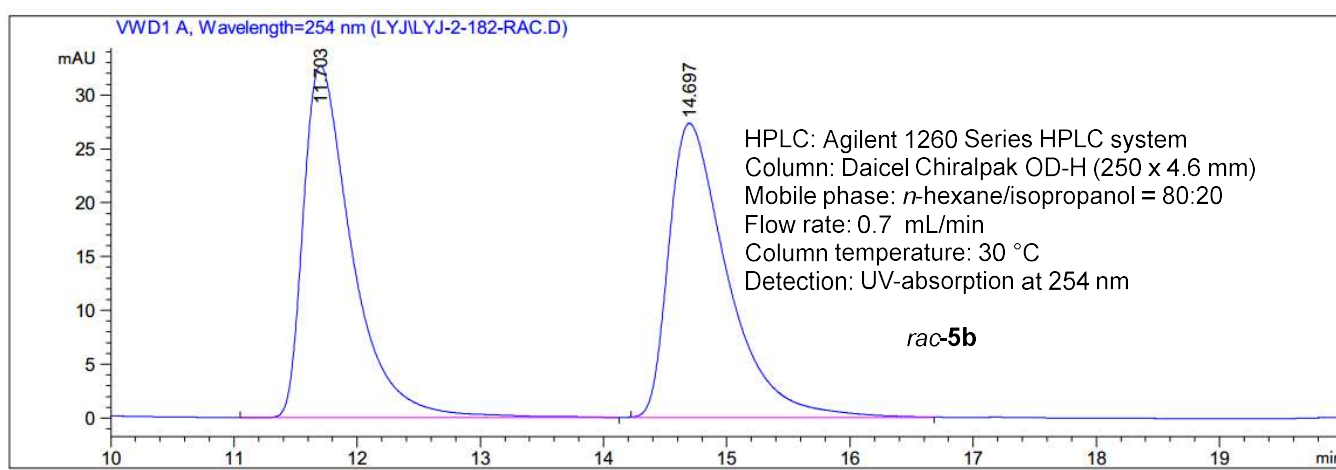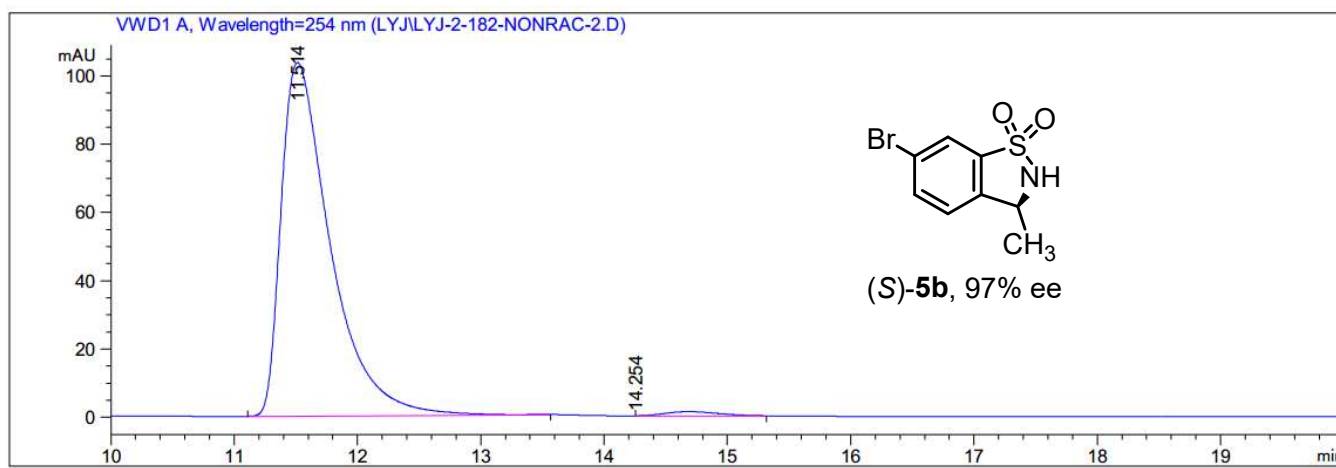

| # | [min]  | [min] | [min]  | [mAU*s]    | [mAU]      | %       |
|---|--------|-------|--------|------------|------------|---------|
| 1 | 11.514 | MM R  | 0.4633 | 2881.10791 | 103.64687  | 98.5662 |
| 2 | 14.254 | MM R  | 0.5346 | 41.91061   | 4.10693e-2 | 1.4338  |

**Figure S8.** HPLC trace for the racemic reference *rac*-**5b**, and non-racemic product (*S*)-**5b** generated from the asymmetric reaction catalyzed by  $\Delta$ -**IrC1a**.

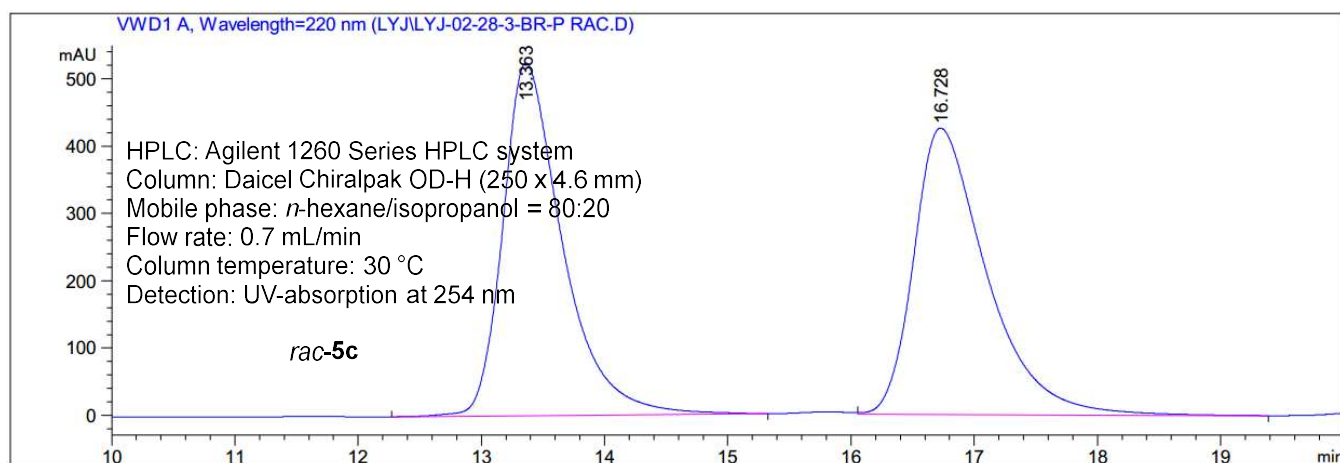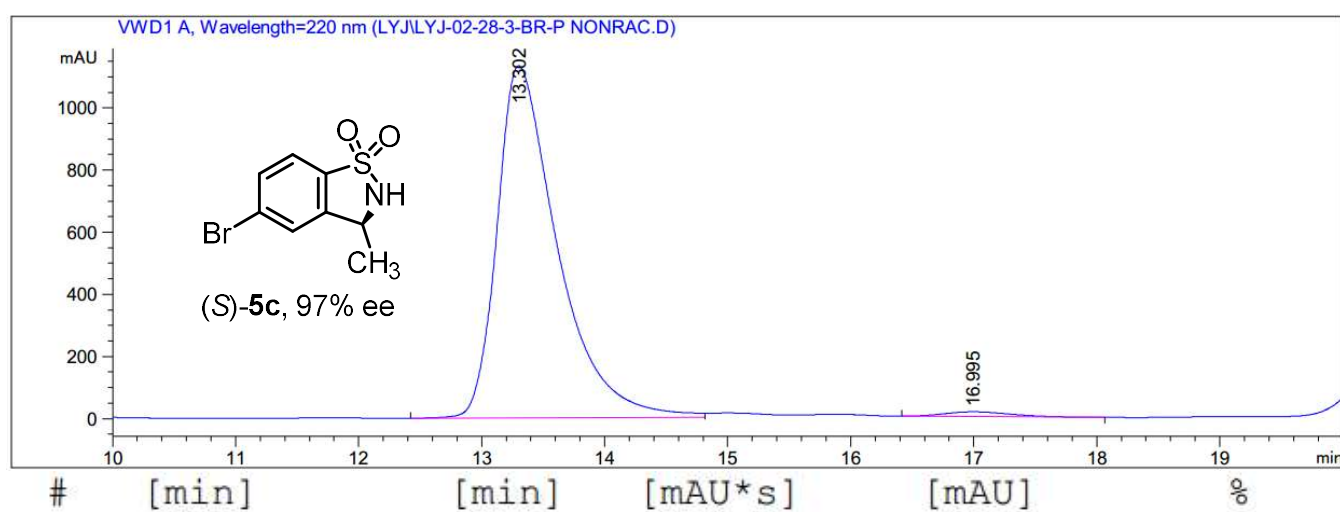

**Figure S9.** HPLC trace for the racemic reference *rac*-**5c**, and non-racemic product (*S*)-**5c** generated from the asymmetric reaction catalyzed by  $\Delta$ -**IrC1a**.



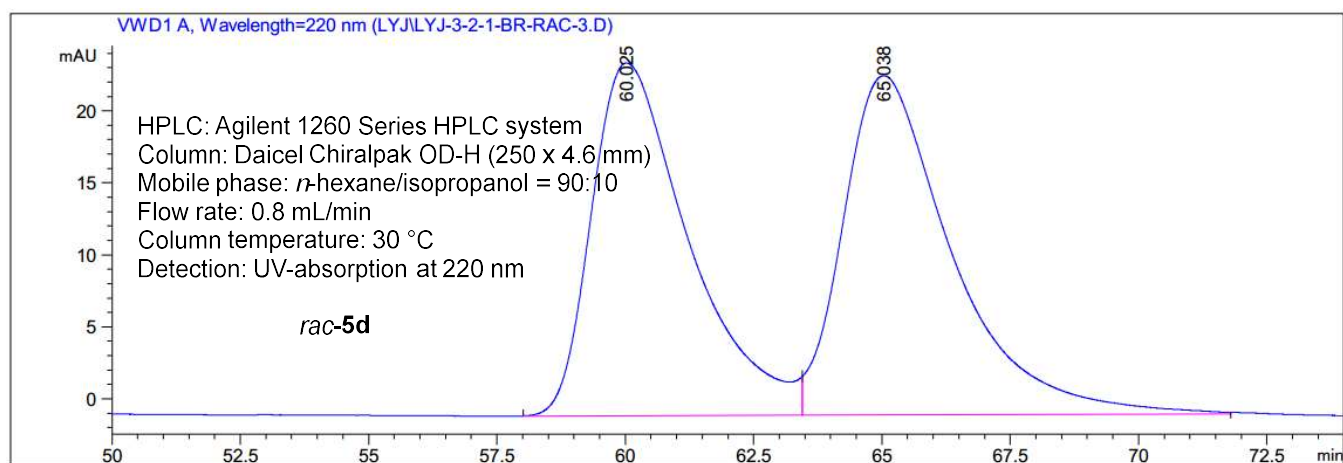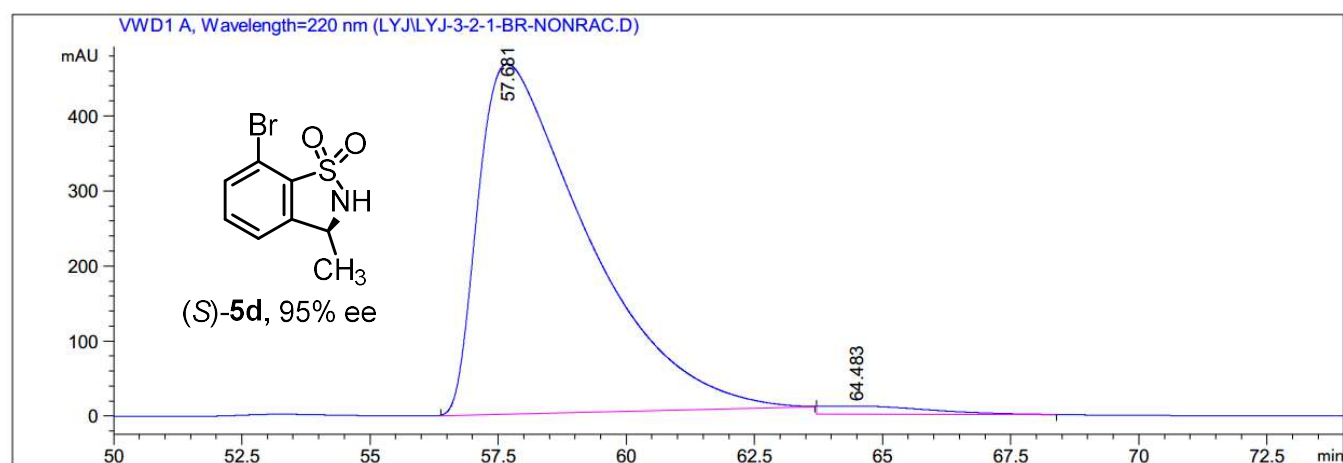

| # | [min]  | [min] | [mAU*s] | [mAU]      | %         |         |
|---|--------|-------|---------|------------|-----------|---------|
| 1 | 57.681 | MM R  | 2.4632  | 6.90088e4  | 466.93390 | 97.6357 |
| 2 | 64.483 | MM R  | 2.4917  | 1671.08569 | 11.17776  | 2.3643  |

**Figure S10.** HPLC trace for the racemic reference *rac*-5d, and non-racemic product (*S*)-5d generated from the asymmetric reaction catalyzed by  $\Delta$ -IrC1a.

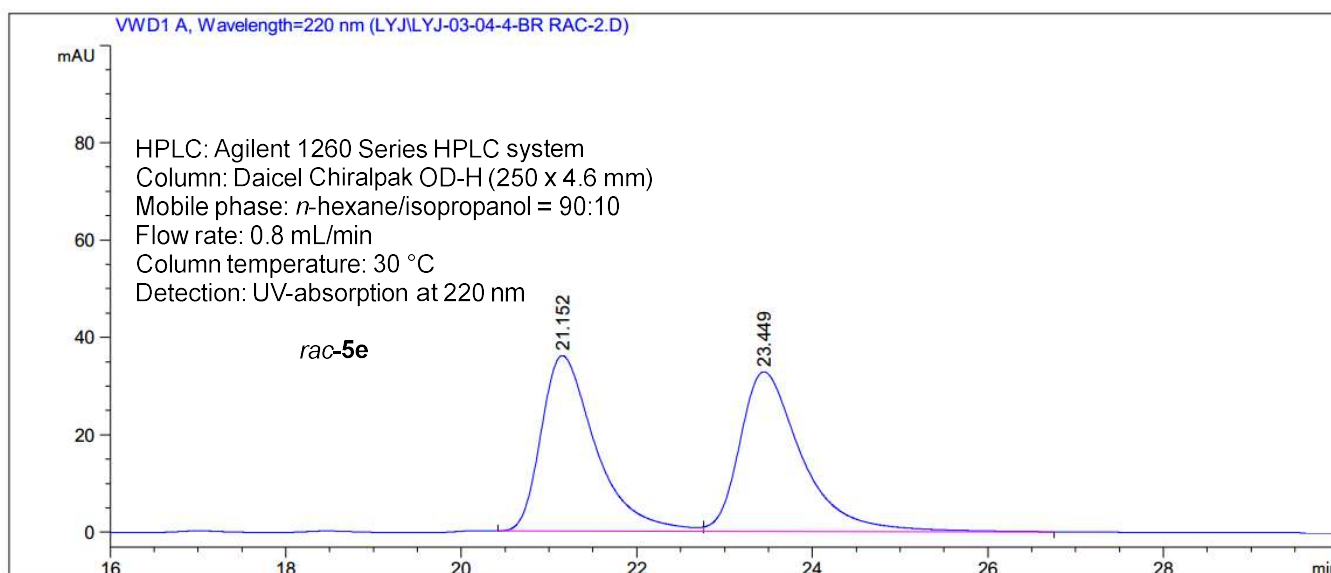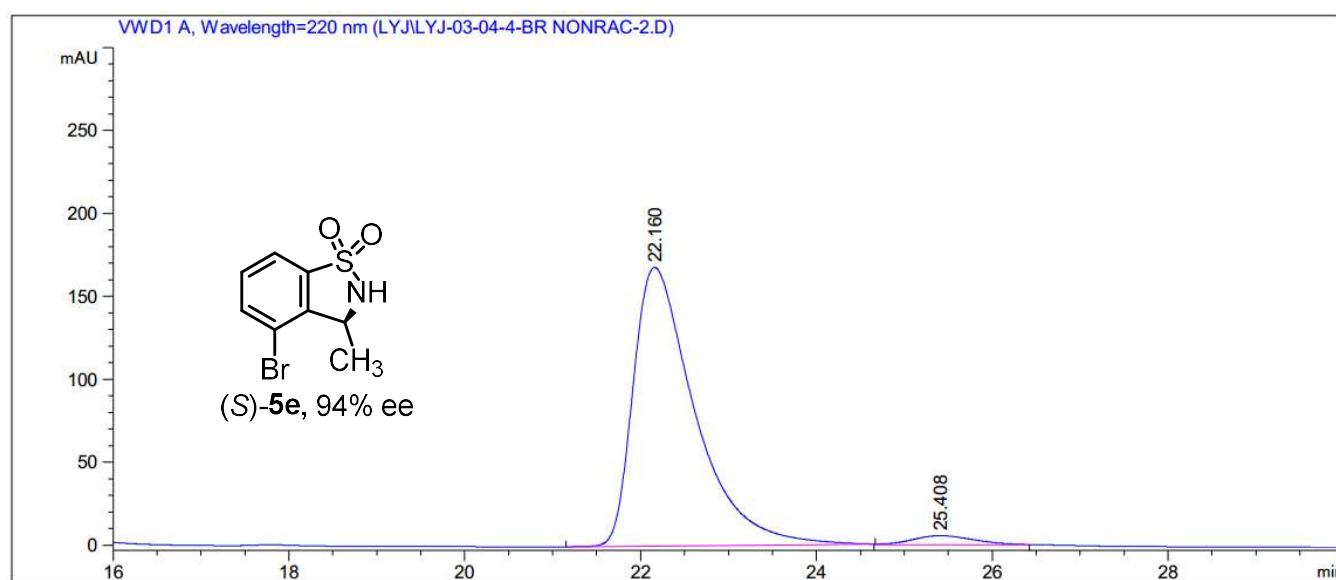

| # | [min]  | [min] | [min] | [mAU*s] | [mAU]      | %         |         |
|---|--------|-------|-------|---------|------------|-----------|---------|
| 1 | 22.160 | MM    | R     | 0.6195  | 8211.78125 | 168.21872 | 96.8768 |
| 2 | 25.408 | MM    | R     | 0.8108  | 264.73770  | 5.44164   | 3.1232  |

**Figure S11.** HPLC trace for the racemic reference *rac*-**5e**, and non-racemic product (*S*)-**5e** generated from the asymmetric reaction catalyzed by  $\Delta$ -**IrC1a**.

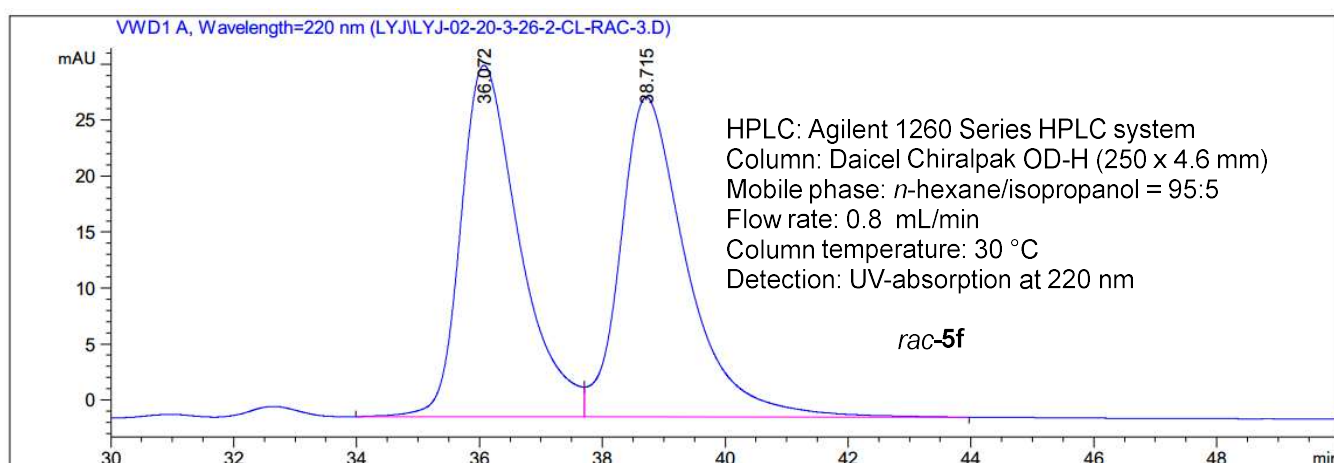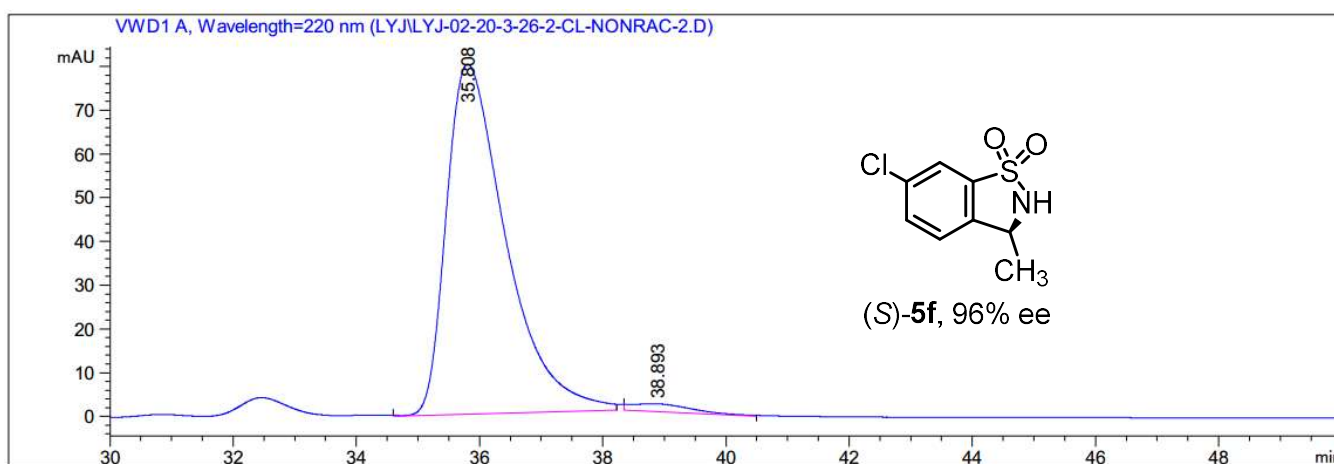

| # | [min]  | [min] | [mAU*s] | [mAU]      | %        |
|---|--------|-------|---------|------------|----------|
| 1 | 35.808 | MM R  | 1.0654  | 5370.77783 | 80.03122 |
| 2 | 38.893 | MM R  | 1.1502  | 121.02467  | 1.75372  |

**Figure S12.** HPLC trace for the racemic reference *rac*-**5f**, and non-racemic product (*S*)-**5f** generated from the asymmetric reaction catalyzed by  $\Delta$ -**IrC1a**.

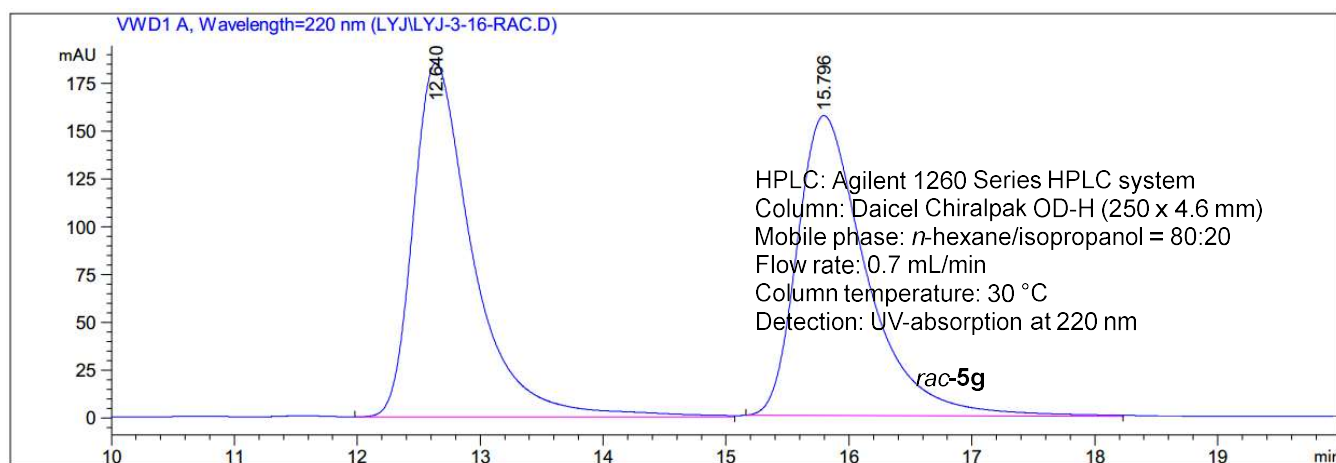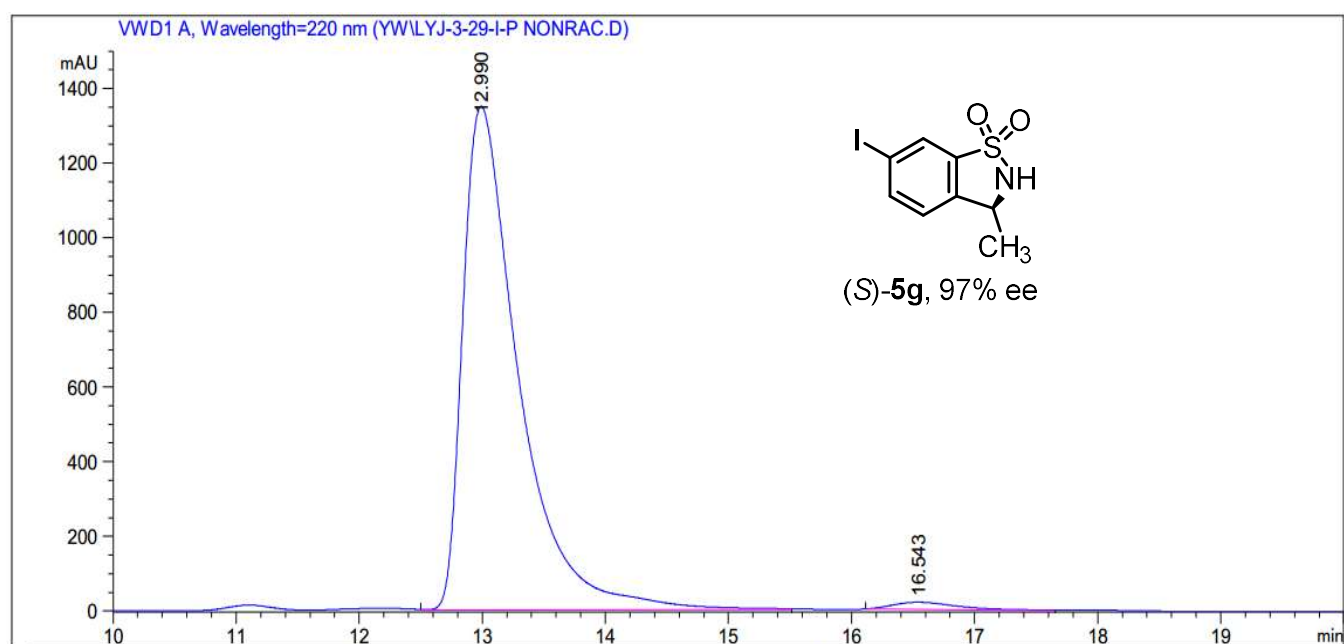

| # | [min]  | [min] | [mAU*s] | [mAU]     | %          | #       | [min] | [min]  | [mAU*s] |        |           |
|---|--------|-------|---------|-----------|------------|---------|-------|--------|---------|--------|-----------|
| 1 | 12.990 | MM R  | 0.5255  | 4.25511e4 | 1349.64233 | 98.2918 | 1     | 12.990 | MM R    | 0.5255 | 4.25511e4 |
| 2 | 16.543 | MM R  | 0.6277  | 739.48041 | 19.63378   | 1.7082  | 2     | 16.543 | MM R    | 0.6277 | 739.48041 |

**Figure S13.** HPLC trace for the racemic reference *rac*-5g, and non-racemic product (*S*)-5g generated from the asymmetric reaction catalyzed by  $\Delta$ -IrC1a.

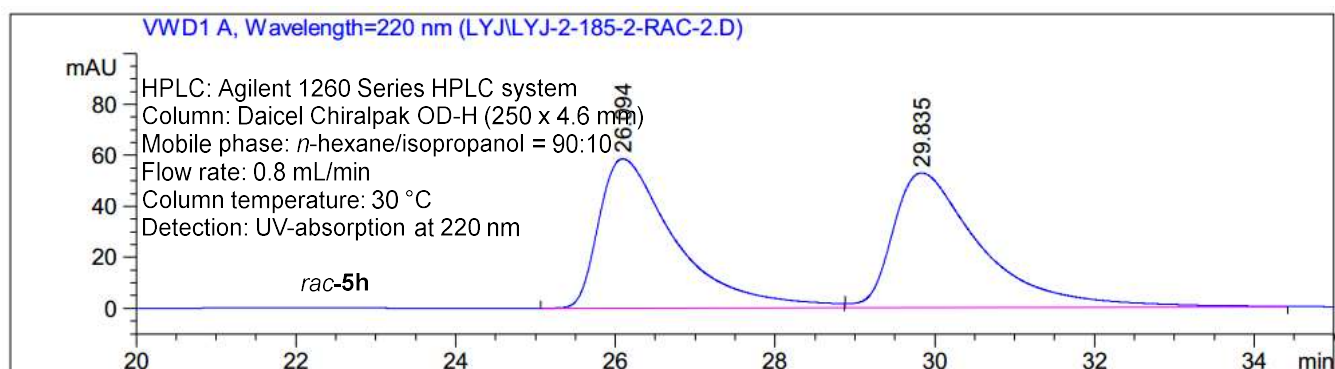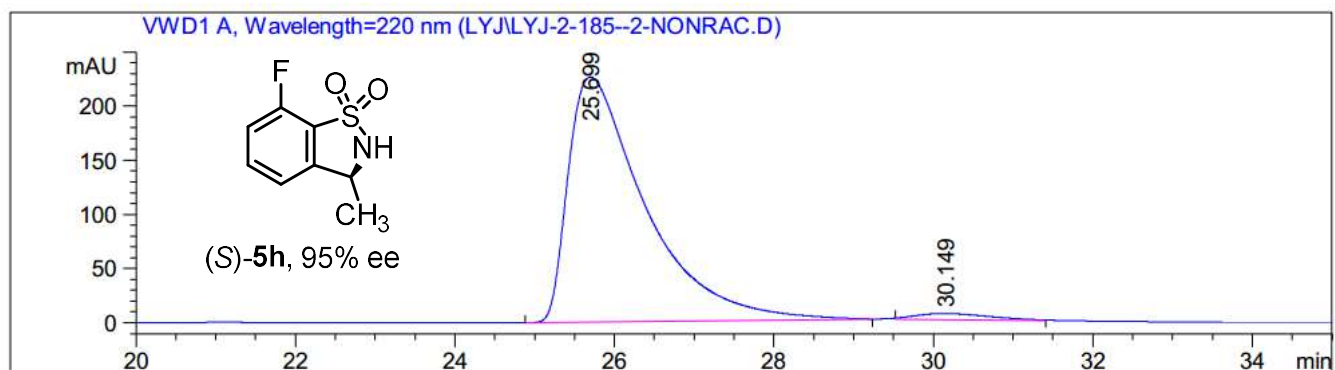

| # | [min]  | [min] | [min]  | [mAU*s]   | [mAU]     | %       |
|---|--------|-------|--------|-----------|-----------|---------|
| 1 | 25.699 | MP R  | 1.1189 | 1.51907e4 | 226.27385 | 97.6515 |
| 2 | 30.149 | MM R  | 1.0804 | 365.33963 | 5.63574   | 2.3485  |

**Figure S14.** HPLC trace for the racemic reference *rac*-5h, and non-racemic product (*S*)-5h generated from the asymmetric reaction catalyzed by  $\Delta$ -IrC1a.

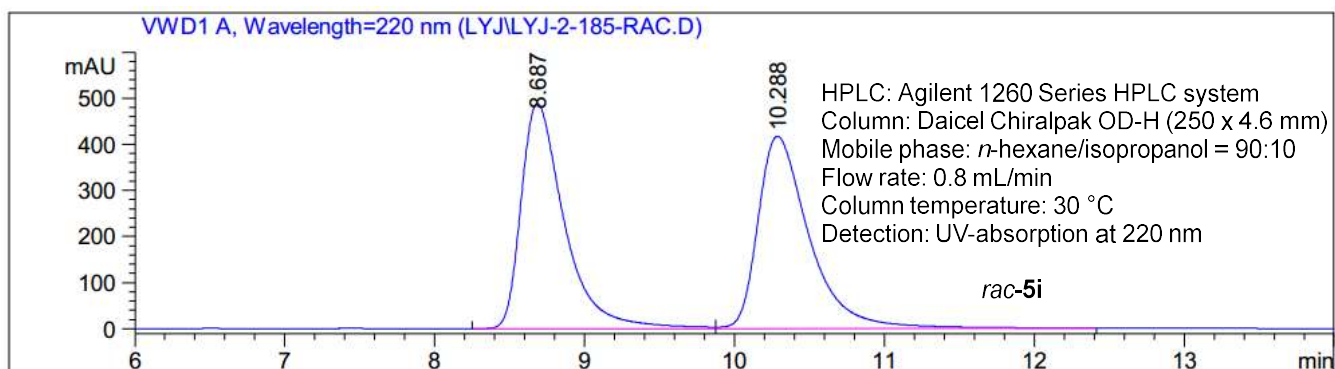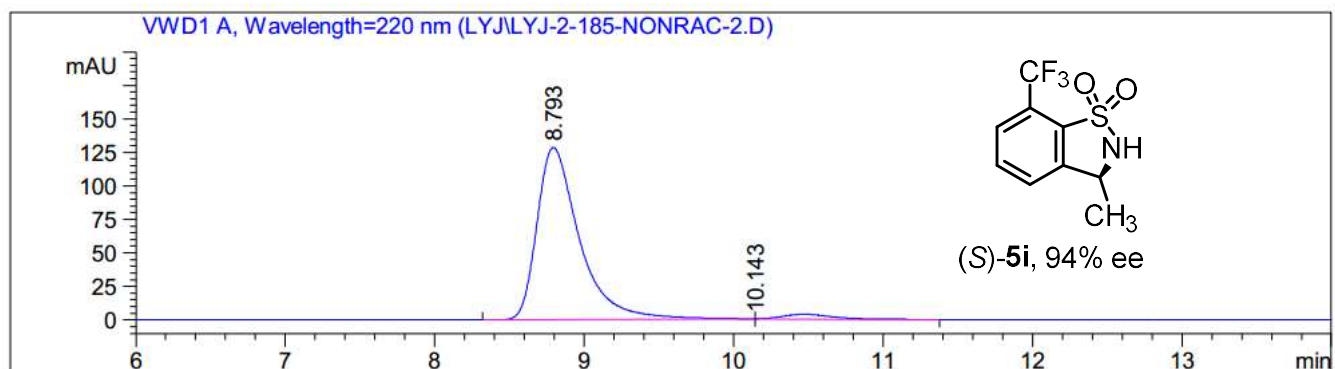

| # | [min]  | [min] | [mAU*s] | [mAU]      | %          |         |
|---|--------|-------|---------|------------|------------|---------|
| 1 | 8.793  | MM R  | 0.3300  | 2542.23486 | 128.41049  | 96.8249 |
| 2 | 10.143 | MM R  | 0.3836  | 83.36668   | 9.79327e-2 | 3.1751  |

**Figure S15.** HPLC trace for the racemic reference *rac*-**5i**, and non-racemic product (*S*)-**5i** generated from the asymmetric reaction catalyzed by  $\Delta$ -**IrC1a**.

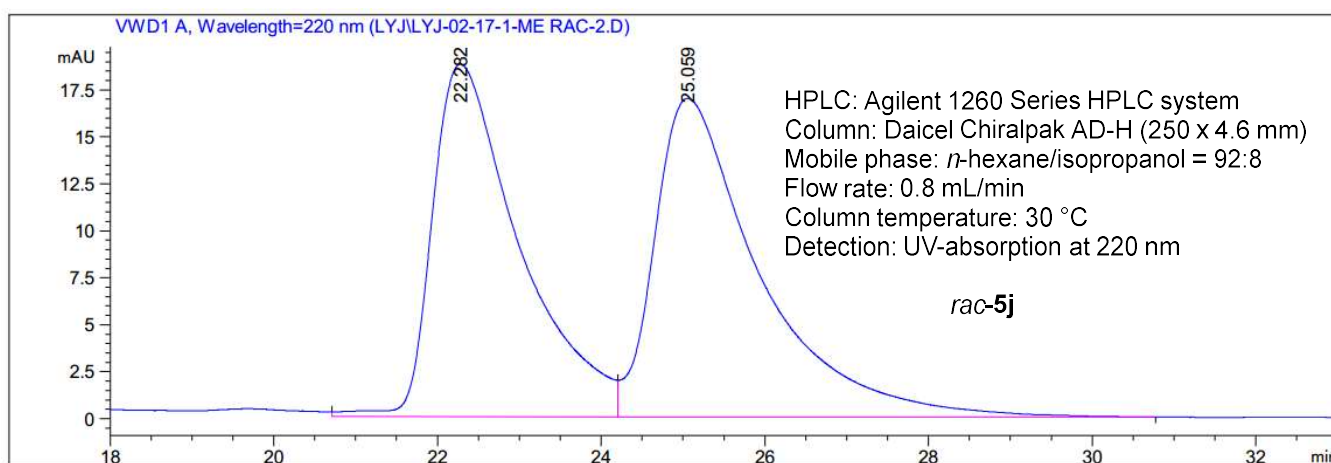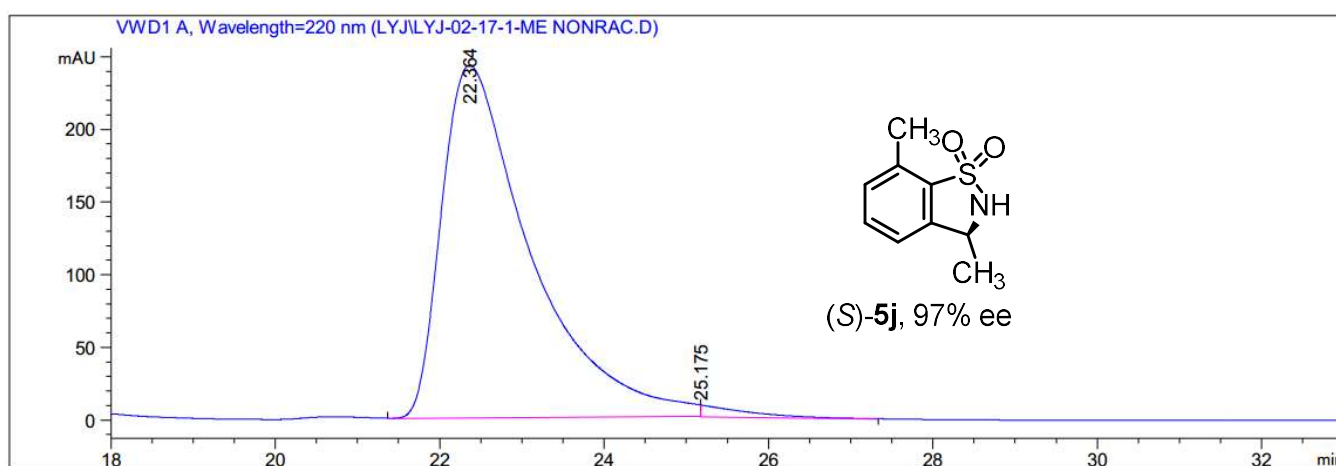

| # | [min]  | [min] | [mAU*s] | [mAU]     | %         |         |
|---|--------|-------|---------|-----------|-----------|---------|
| 1 | 22.364 | MM R  | 1.2573  | 1.83176e4 | 242.80940 | 98.4077 |
| 2 | 25.175 | MM R  | 0.6161  | 296.38535 | 8.01753   | 1.5923  |

**Figure S16.** HPLC trace for the racemic reference *rac*-**5j**, and non-racemic product (S)-**5j** generated from the asymmetric reaction catalyzed by  $\Delta$ -**IrC1a**.

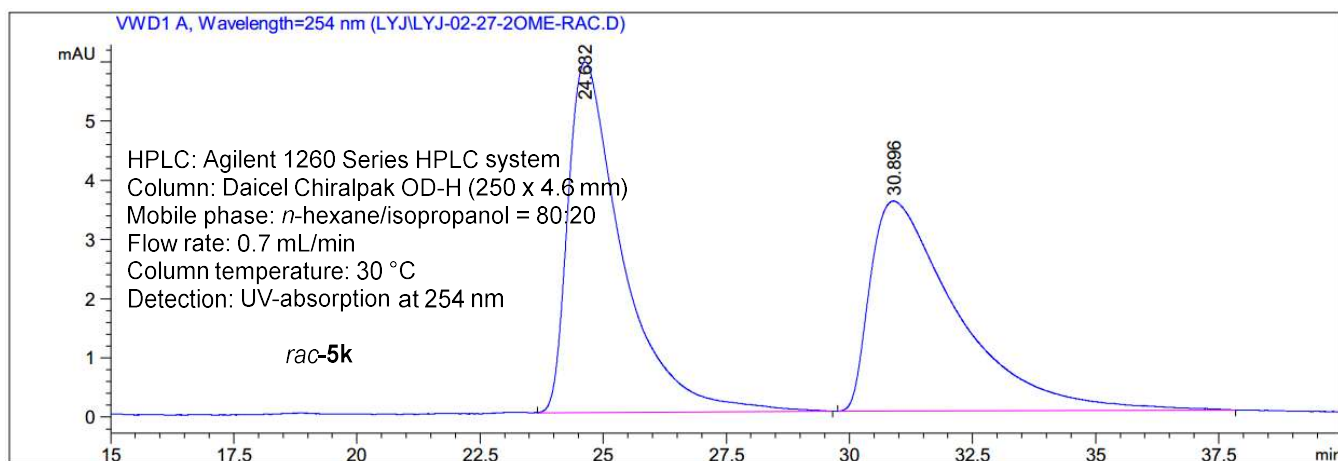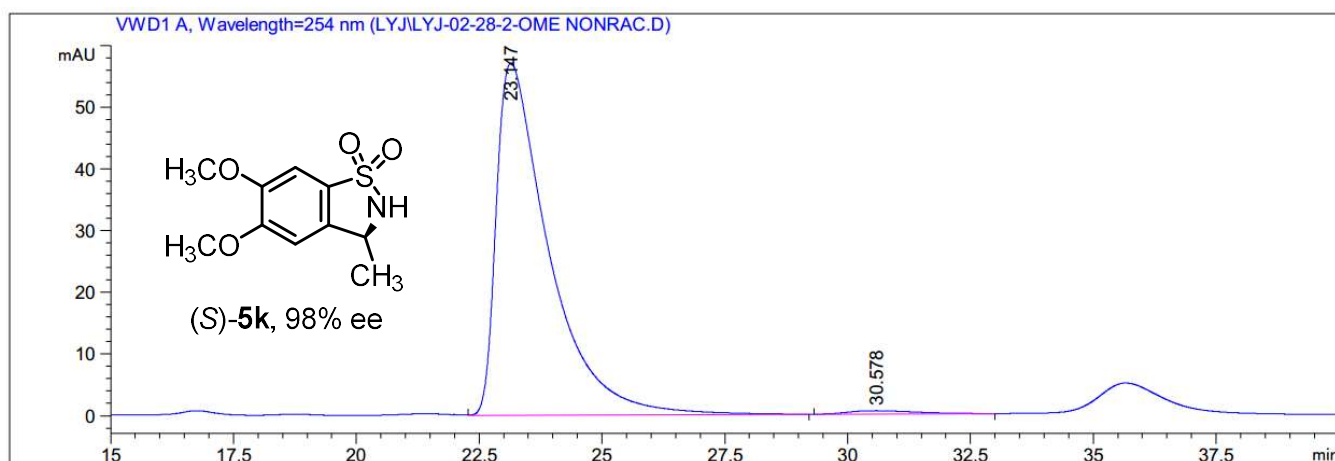

| # | [min]  |    | [min]  | [mAU*s]    | [mAU]      | %       |
|---|--------|----|--------|------------|------------|---------|
| 1 | 23.147 | VB | 1.0798 | 4226.25977 | 57.07914   | 98.8121 |
| 2 | 30.578 | BB | 1.1331 | 50.80817   | 5.41278e-1 | 1.1879  |

**Figure S17.** HPLC trace for the racemic reference *rac*-**5k**, and non-racemic product (*S*)-**5k** generated from the asymmetric reaction catalyzed by  $\Delta$ -**IrC1a**.



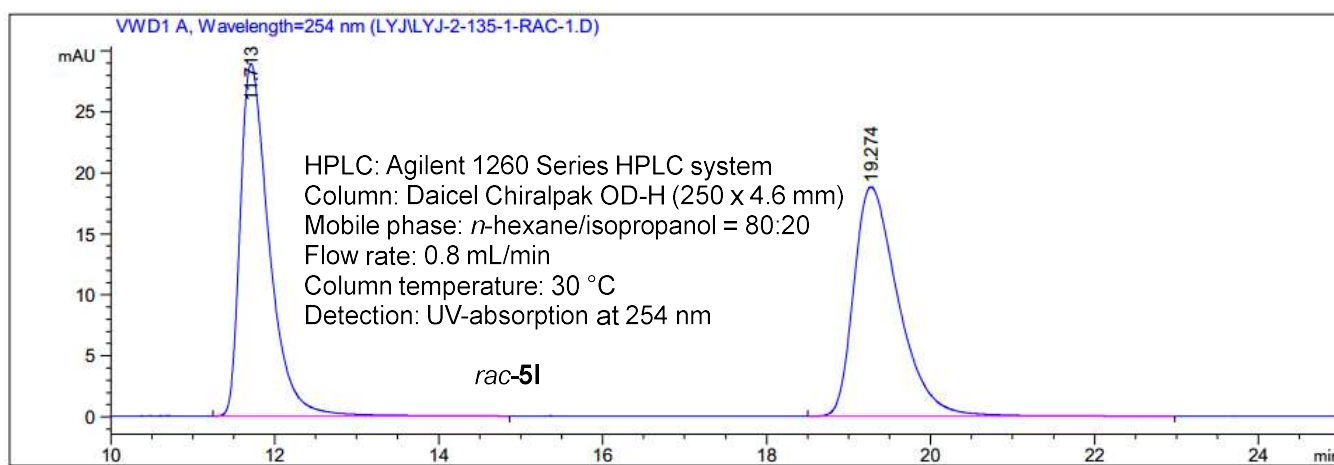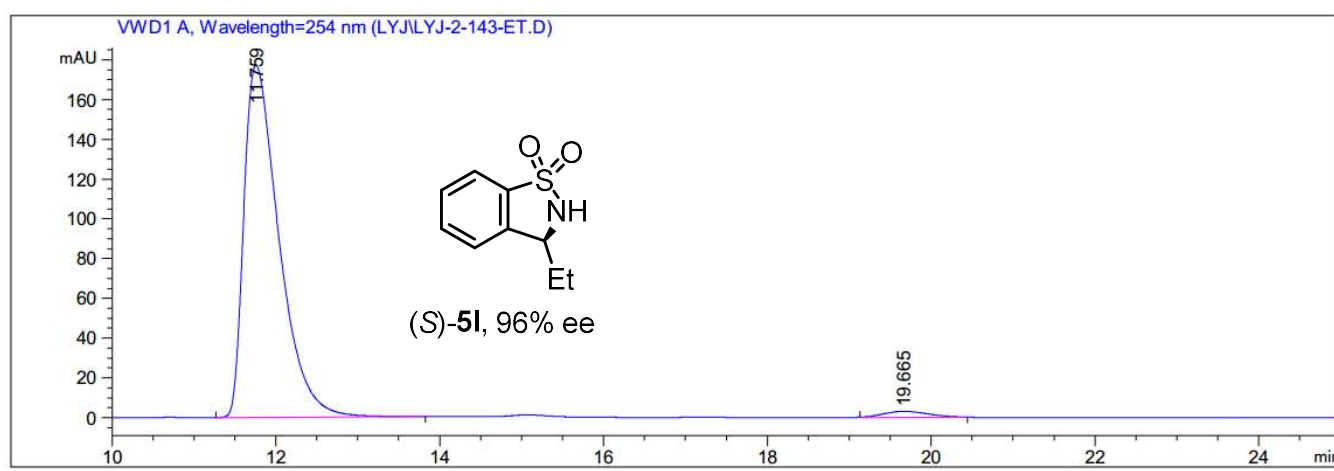

| # | [min]  |      | [min]  | [mAU*s]    | [mAU]     | %       |
|---|--------|------|--------|------------|-----------|---------|
| 1 | 11.759 | BB   | 0.4549 | 5267.13770 | 177.16426 | 97.7863 |
| 2 | 19.665 | MP R | 0.6478 | 119.23861  | 3.06799   | 2.2137  |

**Figure S18.** HPLC trace for the racemic reference *rac*-5I, and non-racemic product (*S*)-5I generated from the asymmetric reaction catalyzed by  $\Delta$ -IrC1a.

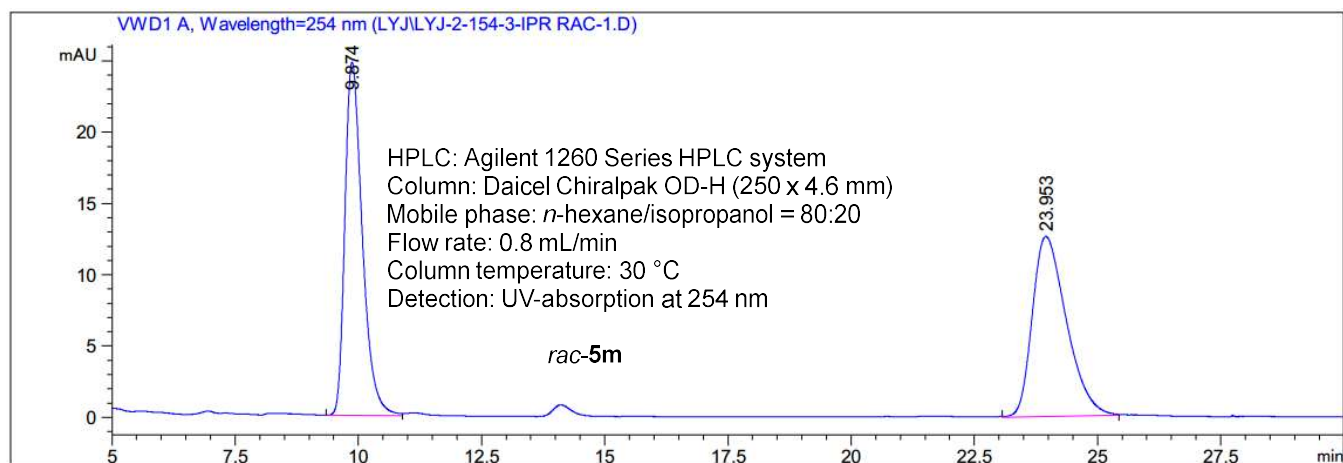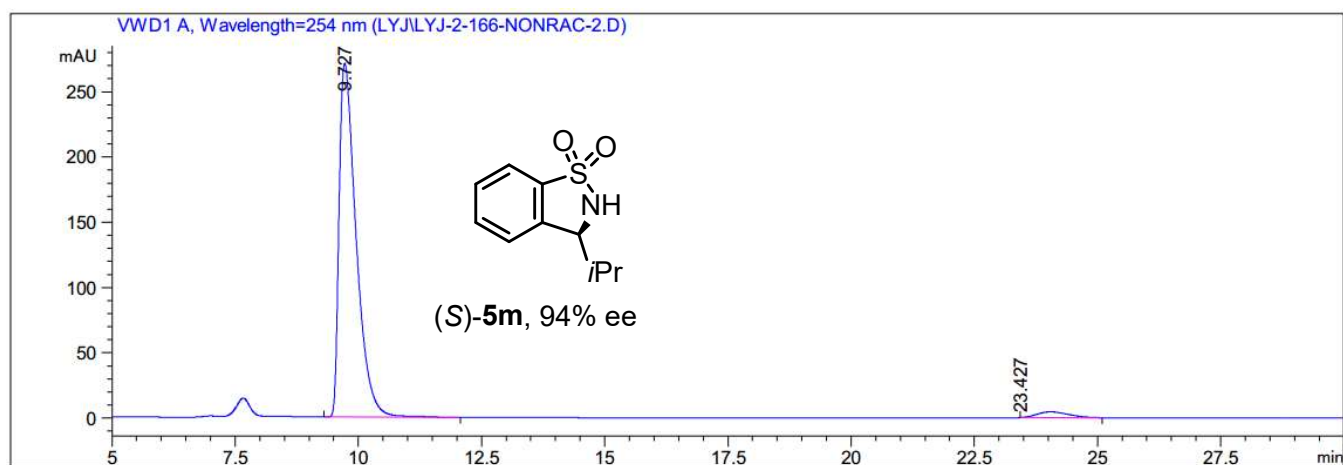

| # | [min]  |      | [min]  | [mAU*s]    | [mAU]     | %       |
|---|--------|------|--------|------------|-----------|---------|
| 1 | 9.727  | BV   | 0.3652 | 6534.90527 | 271.15738 | 97.0041 |
| 2 | 23.427 | PM R | 0.7518 | 201.82614  | 0.00000   | 2.9959  |

**Figure S19.** HPLC trace for the racemic reference *rac*-5m, and non-racemic product (*S*)-5m generated from the asymmetric reaction catalyzed by  $\Delta$ -IrC1a.

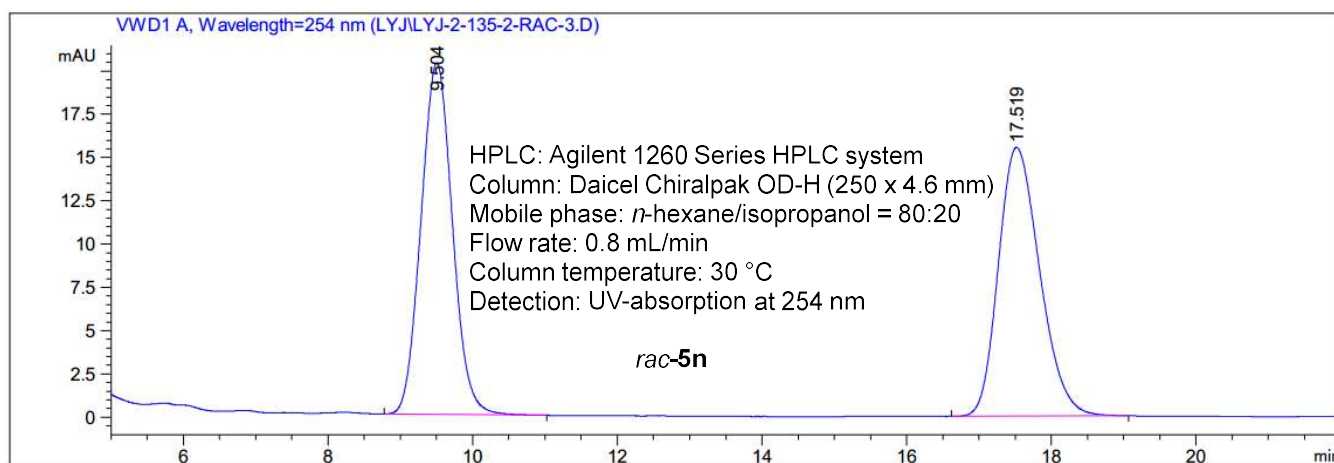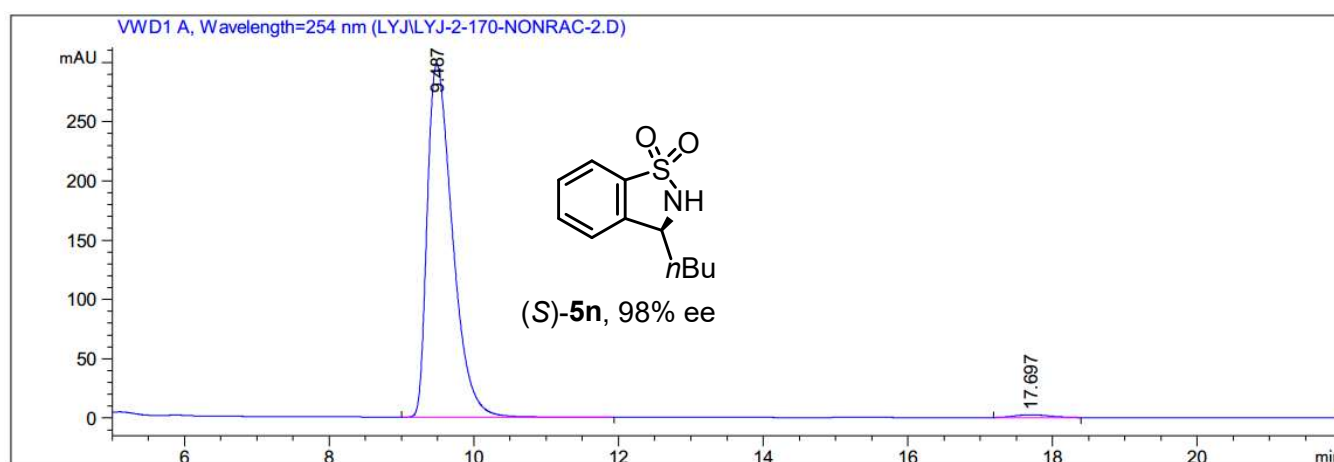

| # | [min]       | [min]  | [mAU*s]    | [mAU]     | %       |
|---|-------------|--------|------------|-----------|---------|
| 1 | 9.487 BB    | 0.3768 | 7205.05176 | 297.27289 | 98.7959 |
| 2 | 17.697 MM R | 0.5934 | 87.81587   | 2.46645   | 1.2041  |

**Figure S20.** HPLC trace for the racemic reference *rac*-5n, and non-racemic product (*S*)-5n generated from the asymmetric reaction catalyzed by  $\Delta$ -IrC1a.

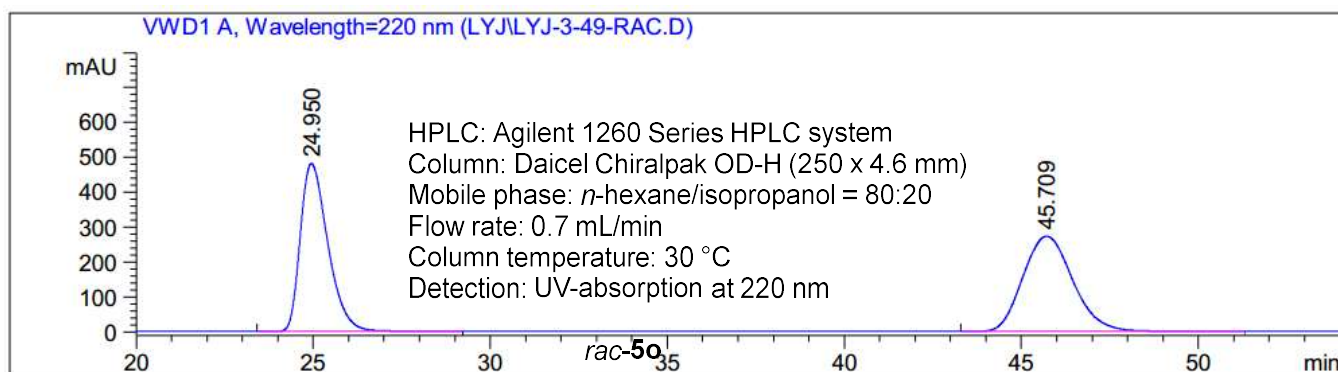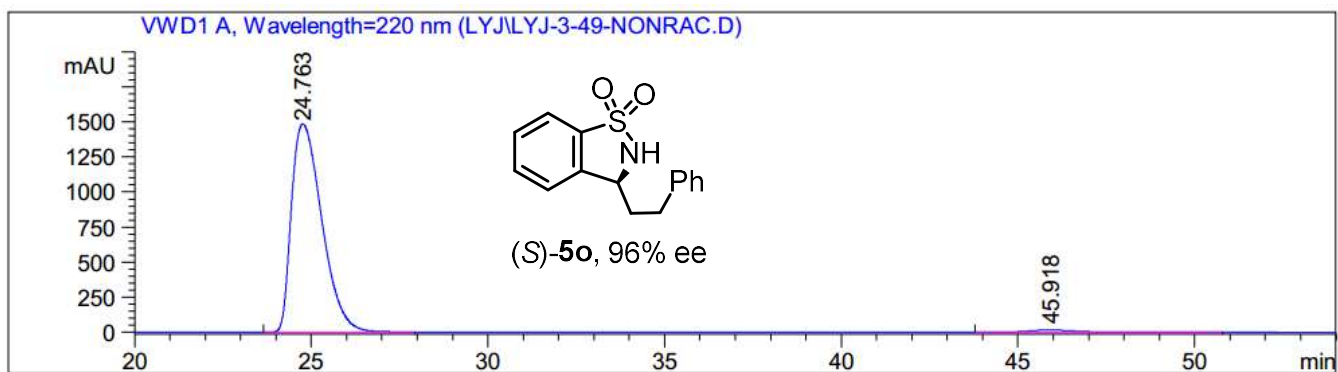

| # | [min]     | [min]  | [mAU*s]    | [mAU]      | %       |
|---|-----------|--------|------------|------------|---------|
| 1 | 24.763 BV | 0.9488 | 8.91635e4  | 1484.28430 | 98.1834 |
| 2 | 45.918 BB | 1.5089 | 1649.71960 | 16.98875   | 1.8166  |

**Figure S21.** HPLC trace for the racemic reference *rac*-**5o**, and non-racemic product (*S*)-**5o** generated from the asymmetric reaction catalyzed by  $\Delta$ -**IrC1a**.

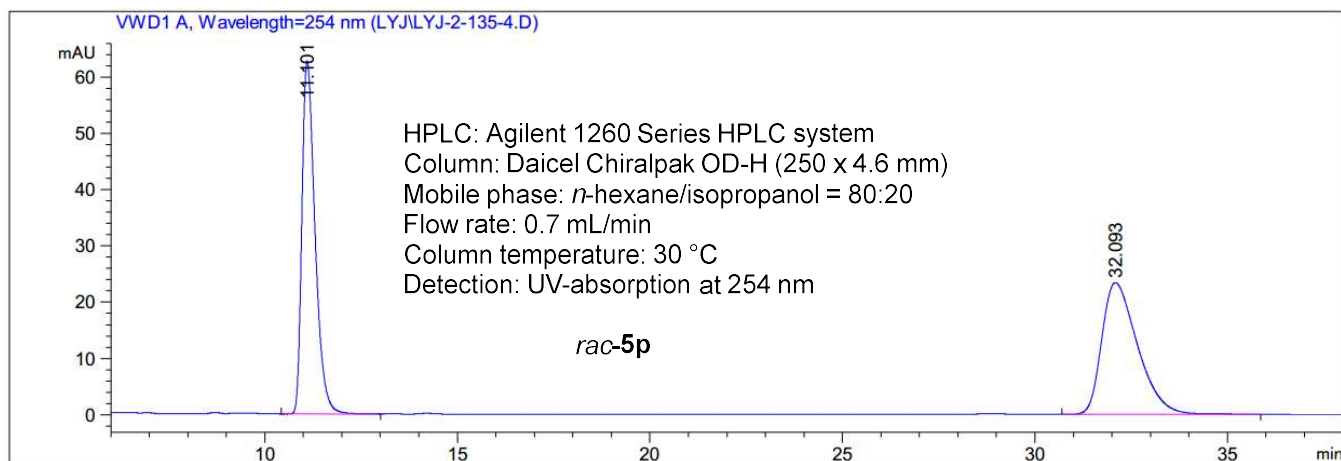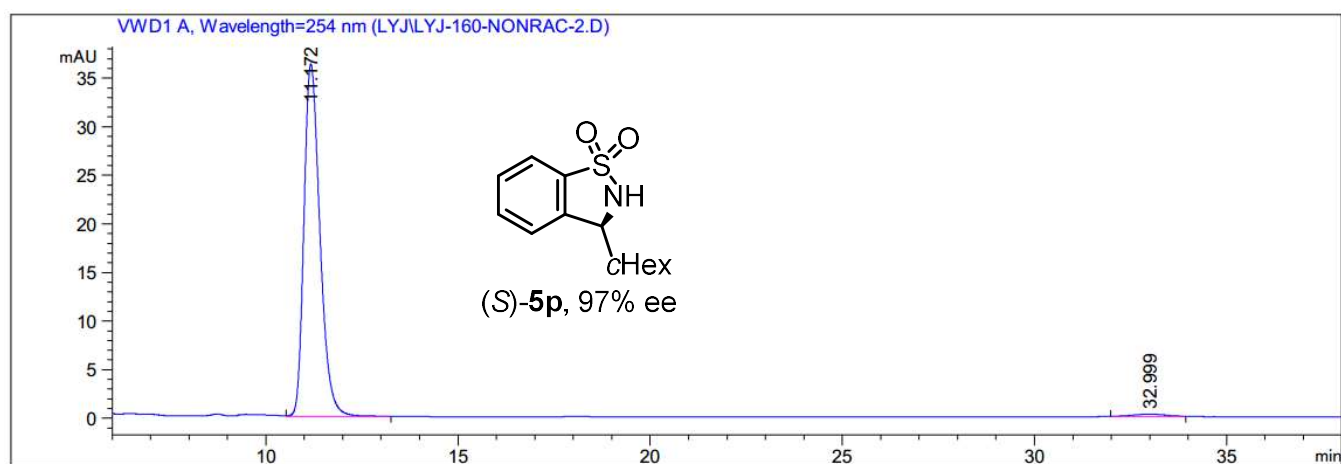

| # | [min]       | [min]  | [mAU*s]    | [mAU]      | %       |
|---|-------------|--------|------------|------------|---------|
| 1 | 11.172 VB   | 0.4491 | 1046.99487 | 36.23561   | 98.5694 |
| 2 | 32.999 MM R | 1.0173 | 15.19528   | 2.48938e-1 | 1.4306  |

**Figure S22.** HPLC trace for the racemic reference *rac*-**5p**, and non-racemic product (*S*)-**5p** generated from the asymmetric reaction catalyzed by  $\Delta$ -**IrC1a**.

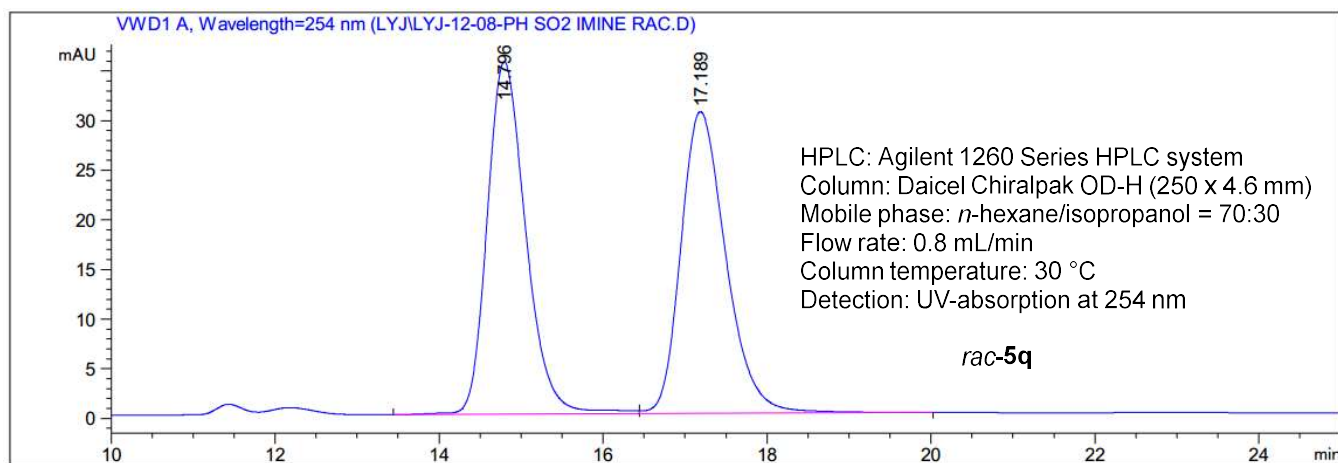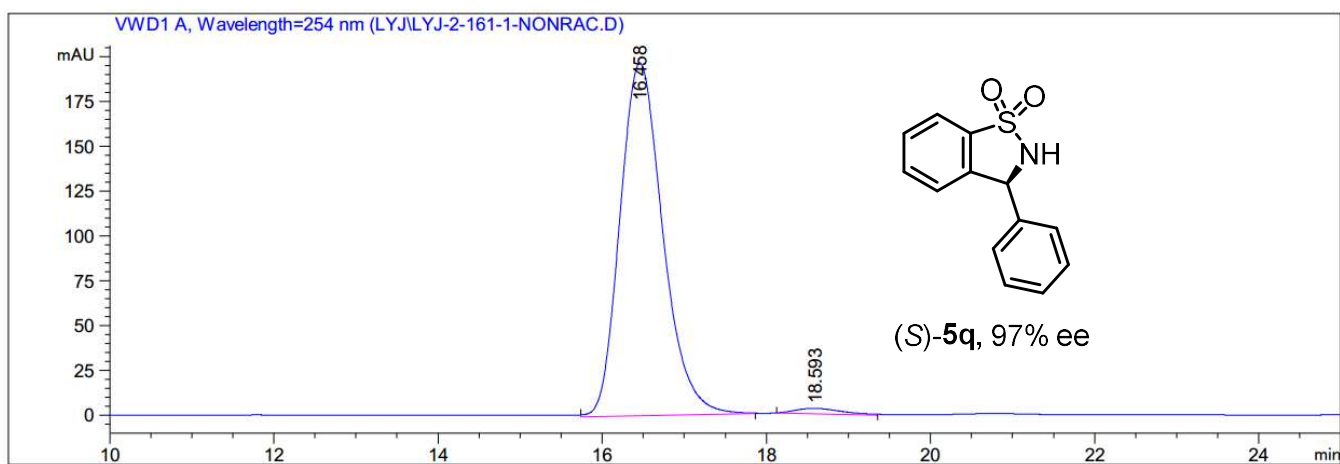

| # | [min]  | [min] | [mAU*s] | [mAU]      | %         |         |
|---|--------|-------|---------|------------|-----------|---------|
| 1 | 16.458 | MM R  | 0.6044  | 7140.60059 | 196.91640 | 98.3548 |
| 2 | 18.593 | MM R  | 0.6495  | 119.44384  | 3.06493   | 1.6452  |

**Figure S23.** HPLC trace for the racemic reference *rac*-5q, and non-racemic product (*S*)-5q generated from the asymmetric reaction catalyzed by  $\Delta$ -IrC1a.

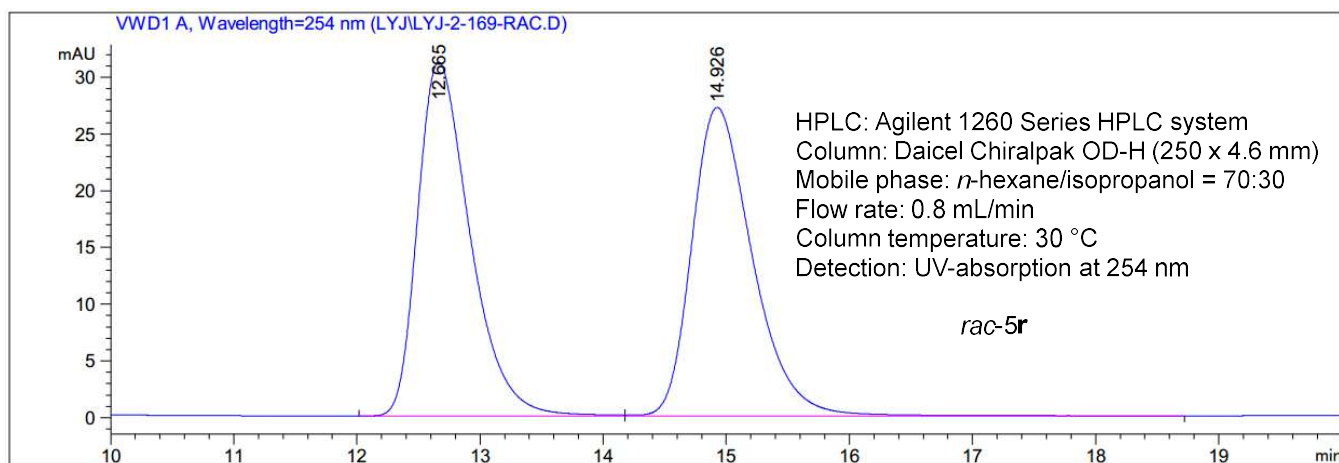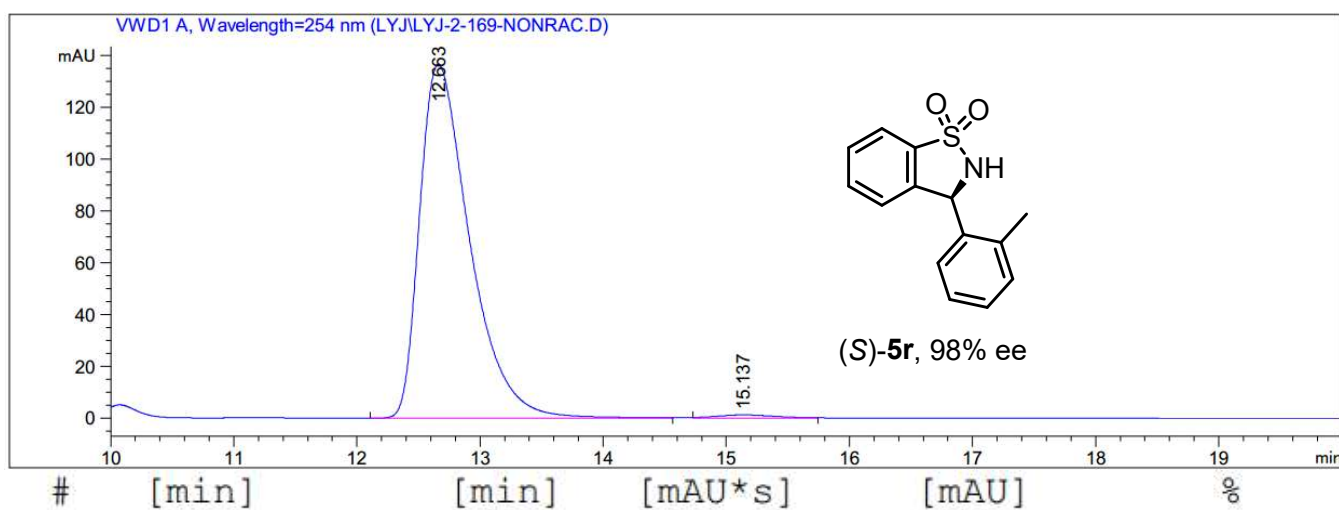

**Figure S24.** HPLC trace for the racemic reference *rac*-**5r**, and non-racemic product (*S*)-**5r** generated from the asymmetric reaction catalyzed by  $\Delta$ -**IrC1a**.

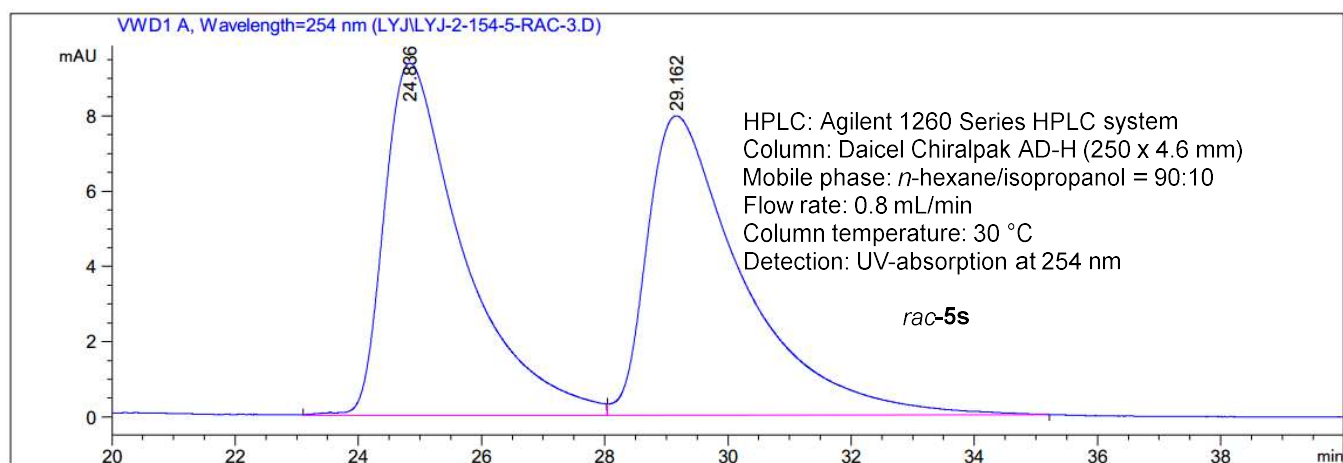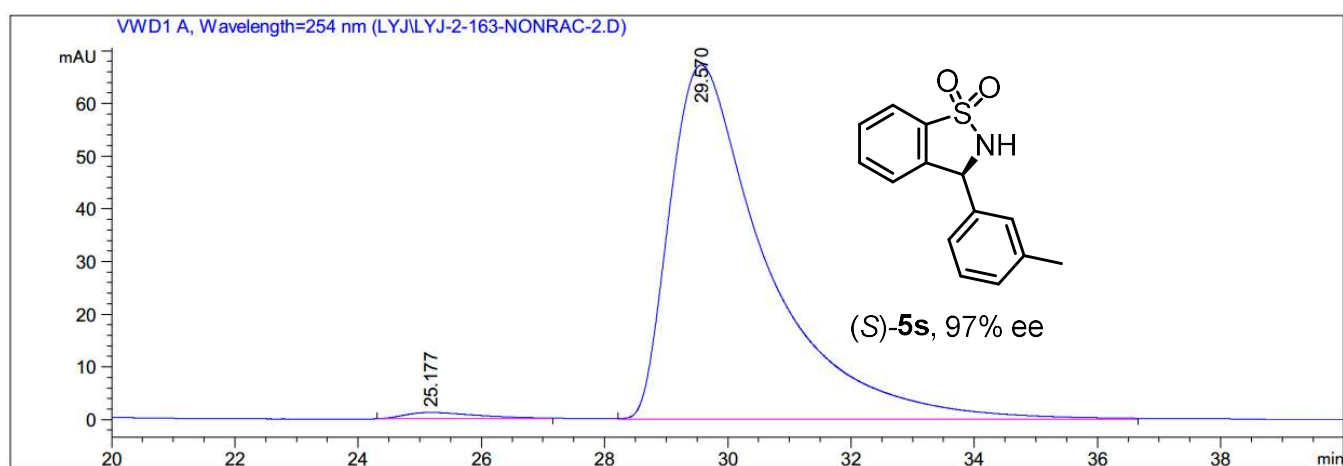

| # | [min]  | [min] | [mAU*s] | [mAU]      | %        |
|---|--------|-------|---------|------------|----------|
| 1 | 25.177 | MM R  | 1.4429  | 105.35289  | 1.21689  |
| 2 | 29.570 | MM R  | 1.8284  | 7368.85400 | 67.17178 |
|   |        |       |         |            | 98.5904  |

**Figure S25.** HPLC trace for the racemic reference *rac*-**5s**, and non-racemic product (*S*)-**5s** generated from the asymmetric reaction catalyzed by  $\Delta$ -**IrC1a**.



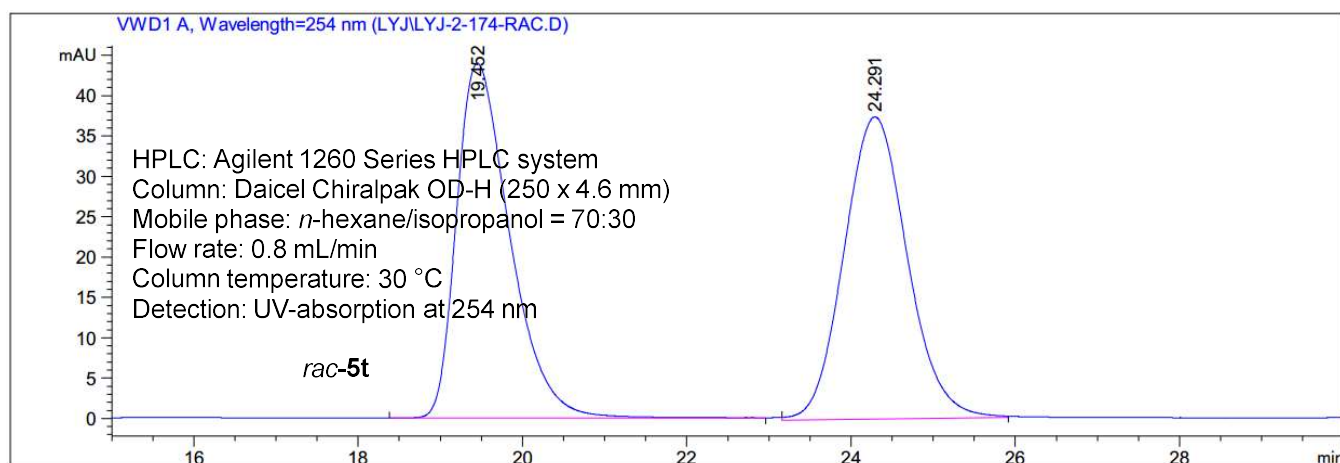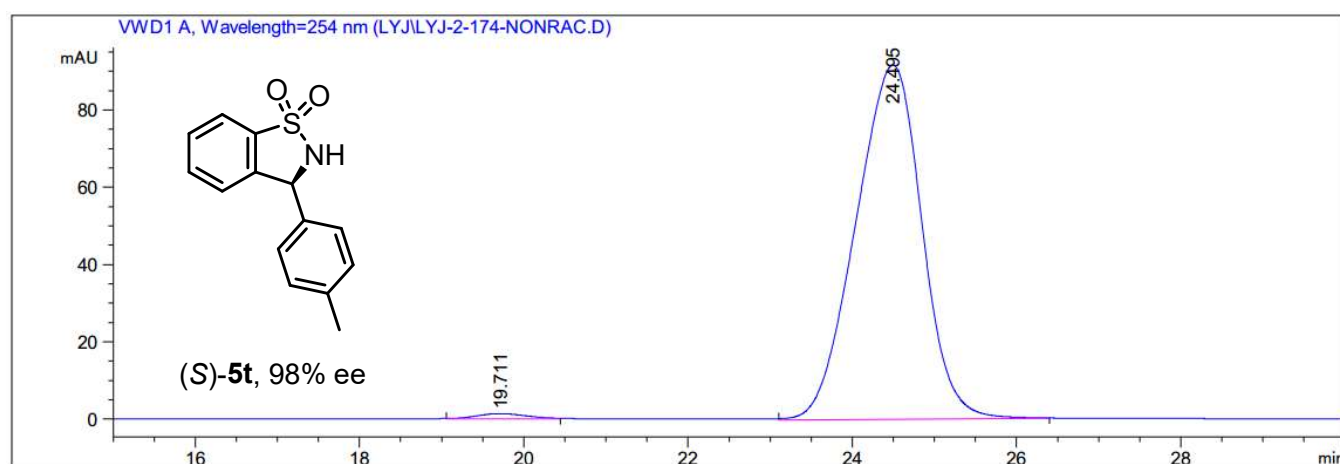

| # | [min]  | [min] | [mAU*s] | [mAU]      | %        |         |
|---|--------|-------|---------|------------|----------|---------|
| 1 | 19.711 | MM R  | 0.7036  | 56.42367   | 1.33649  | 1.0892  |
| 2 | 24.495 | MM R  | 0.9311  | 5123.65430 | 91.71713 | 98.9108 |

**Figure S26.** HPLC trace for the racemic reference *rac*-5t, and non-racemic product (*S*)-5t generated from the asymmetric reaction catalyzed by  $\Delta$ -IrC1a.

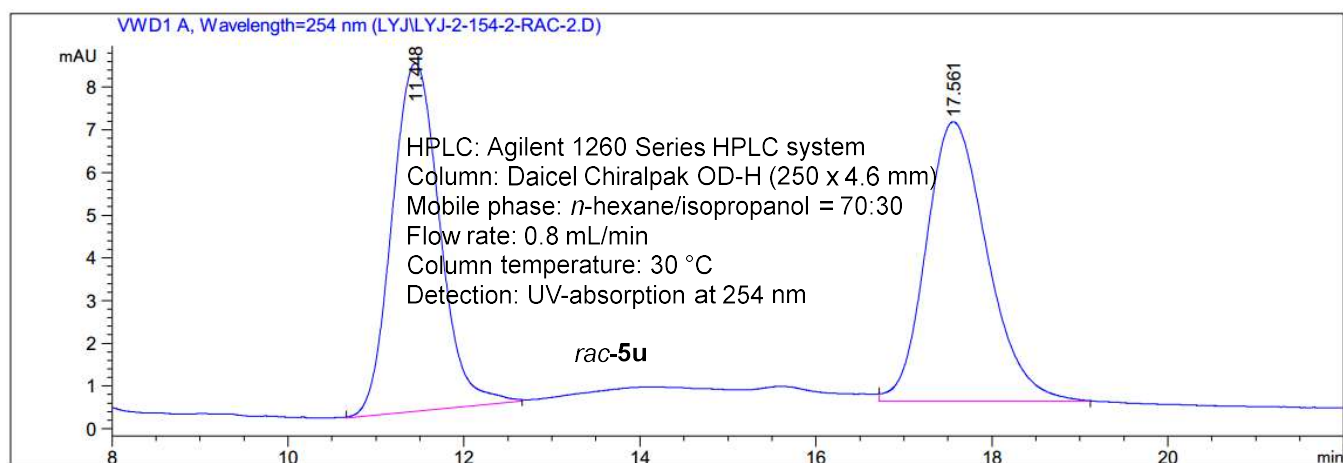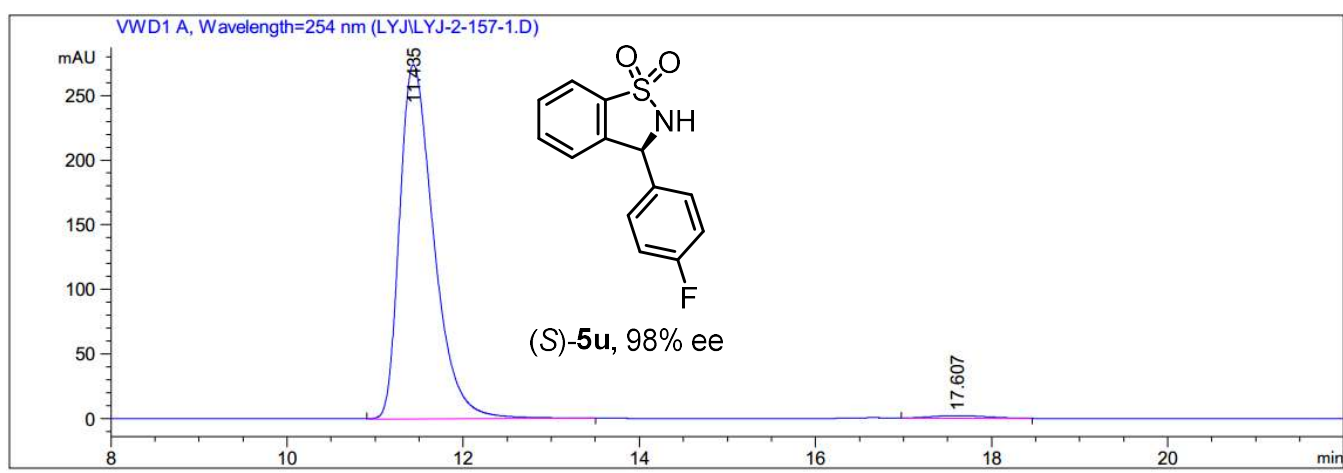

| # | [min]  | [min] | [min] | [mAU*s] | [mAU]      | %         |         |
|---|--------|-------|-------|---------|------------|-----------|---------|
| 1 | 11.435 | MM    | R     | 0.4483  | 7368.42871 | 273.92953 | 98.8165 |
| 2 | 17.607 | MM    | R     | 0.7164  | 88.24976   | 2.05320   | 1.1835  |

**Figure S27.** HPLC trace for the racemic reference *rac*-**5u**, and non-racemic product (*S*)-**5u** generated from the asymmetric reaction catalyzed by  $\Delta$ -**IrC1a**.

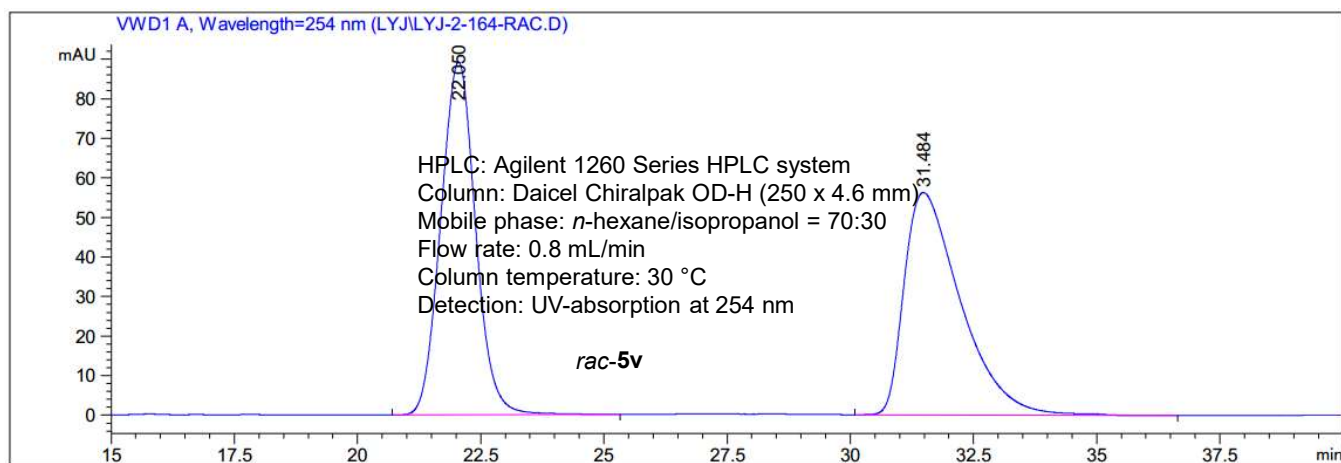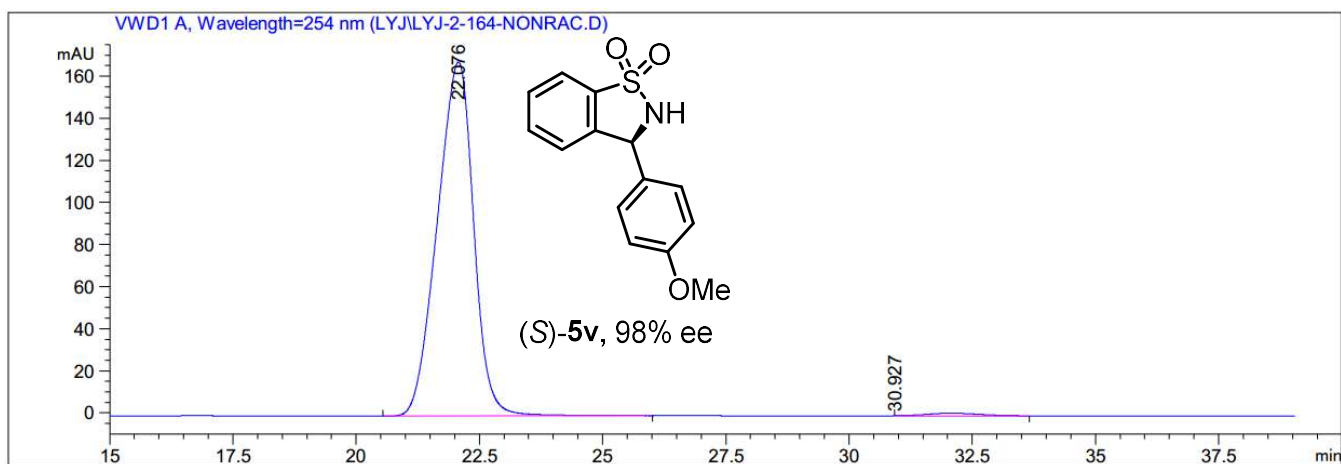

| # | [min]  |      | [min]  | [mAU*s]    | [mAU]      | %       |
|---|--------|------|--------|------------|------------|---------|
| 1 | 22.076 | BV   | 0.7990 | 8604.29102 | 168.14764  | 98.9326 |
| 2 | 30.927 | MM R | 1.2344 | 92.83033   | 2.06865e-2 | 1.0674  |

**Figure S28.** HPLC trace for the racemic reference *rac*-5v, and non-racemic product (*S*)-5v generated from the asymmetric reaction catalyzed by  $\Delta$ -IrC1a.

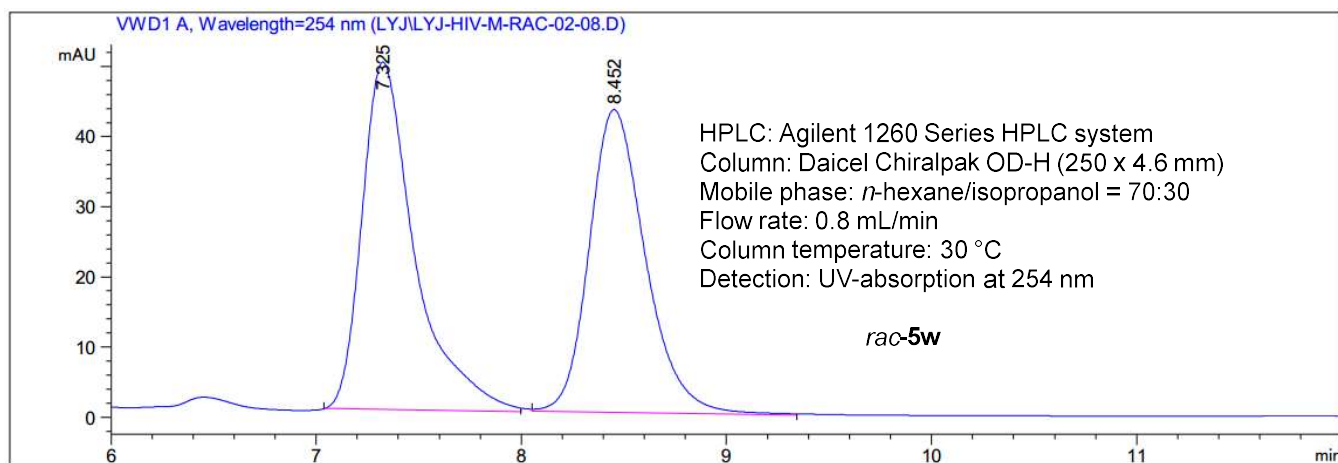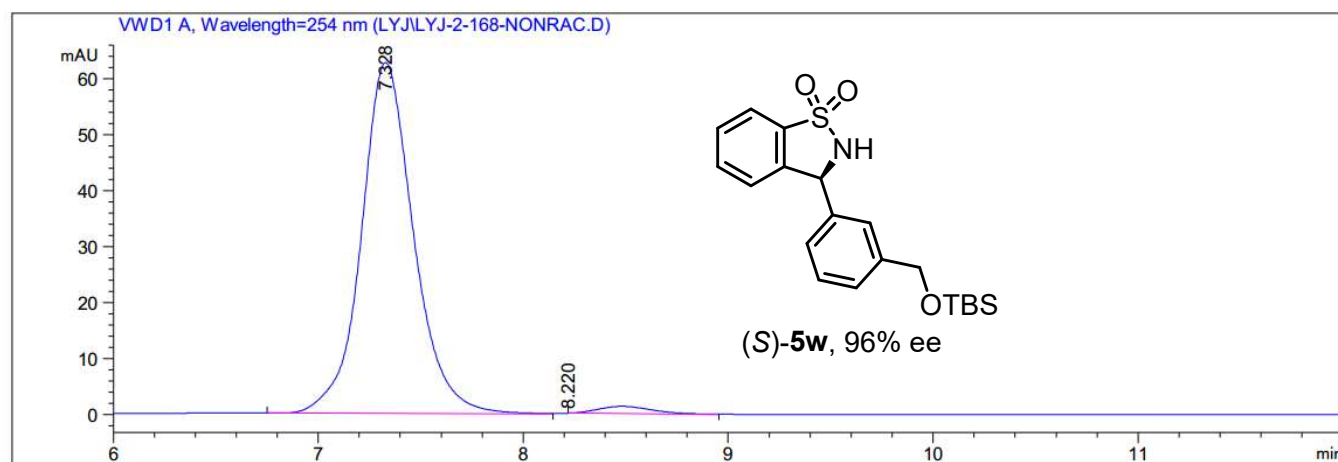

| # | [min]      | [min]  | [mAU*s]    | [mAU]    | %       |
|---|------------|--------|------------|----------|---------|
| 1 | 7.328 BV   | 0.2707 | 1111.14185 | 62.70434 | 97.8501 |
| 2 | 8.220 PM R | 0.3120 | 24.41298   | 0.00000  | 2.1499  |

**Figure S29.** HPLC trace for the racemic reference *rac*-5w, and non-racemic product (*S*)-5w generated from the asymmetric reaction catalyzed by  $\Delta$ -IrC1a.

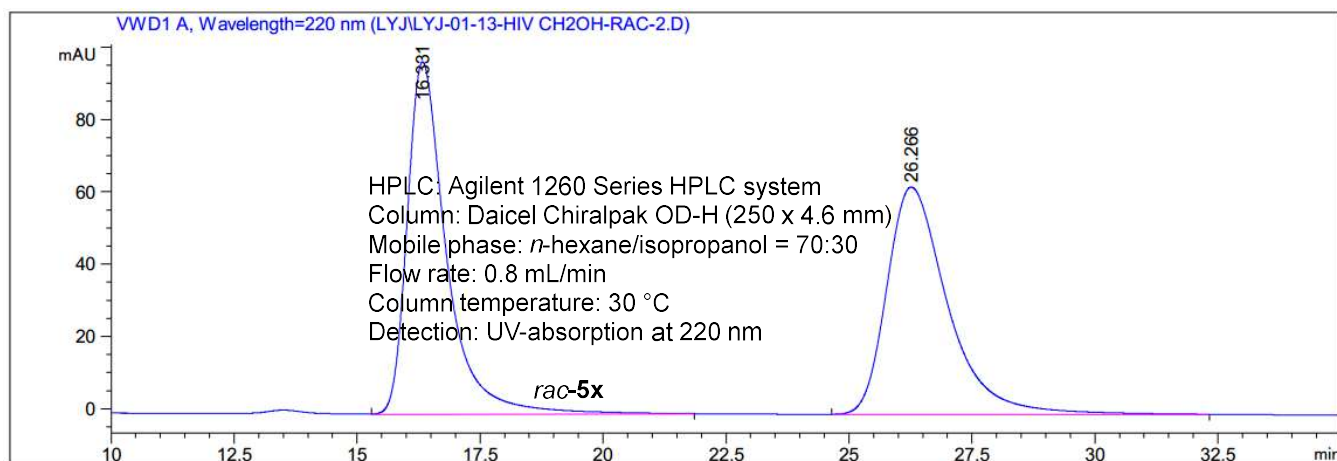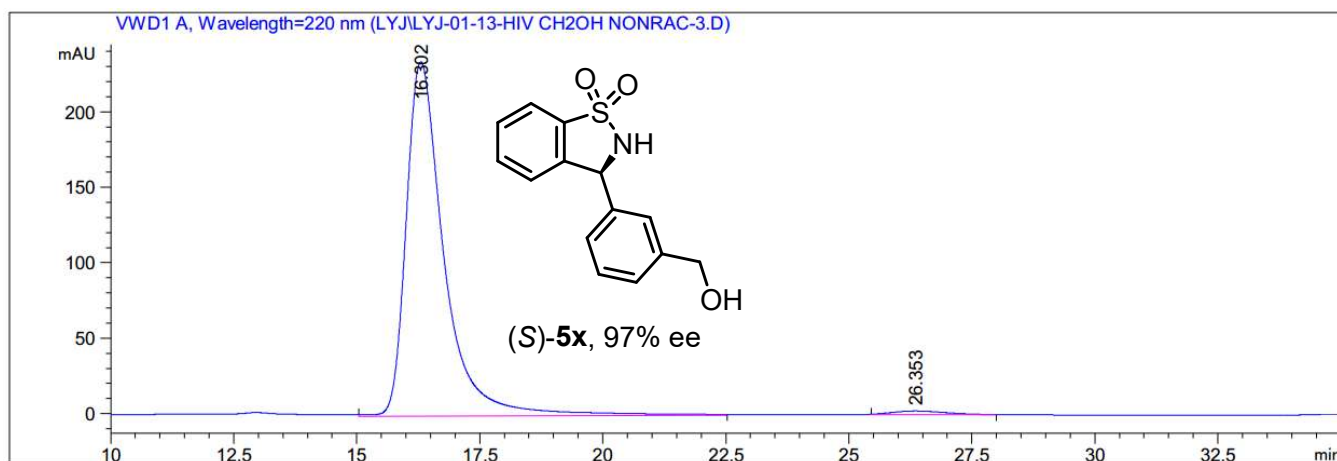

| # | [min]  | [min] | [mAU*s] | [mAU]     | %         |         |
|---|--------|-------|---------|-----------|-----------|---------|
| 1 | 16.302 | MM R  | 0.8935  | 1.25718e4 | 234.50563 | 98.5858 |
| 2 | 26.353 | MP R  | 1.2448  | 180.33557 | 2.41455   | 1.4142  |

**Figure S30.** HPLC trace for the racemic reference *rac-5x*, and non-racemic product (*S*)-**5x** generated from the asymmetric reaction catalyzed by  $\Delta$ -**IrC1a**.

### 6.3 Determination of Enantiopurities of the Transformation Products

Optical purities of the compounds **5x** and **7-9** were determined with a Daicel Chiralpak OD-H or IC HPLC column on an Agilent 1260 Series HPLC System. The column temperature was 30 °C and UV-absorption was measured at 254 or 220 nm.

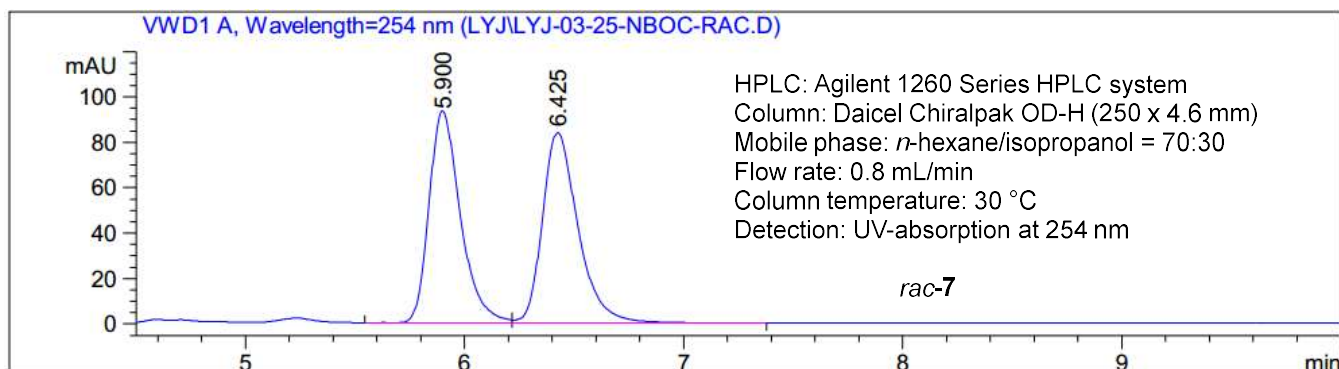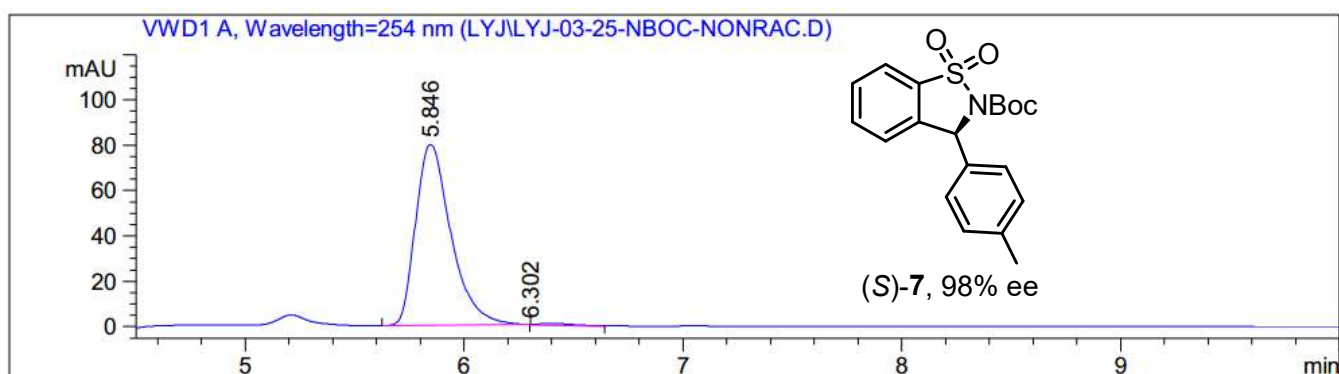

| # | [min] | [min] | [mAU*s] | [mAU]     | %          |         |
|---|-------|-------|---------|-----------|------------|---------|
| 1 | 5.846 | MM R  | 0.1872  | 897.65936 | 79.92964   | 98.8175 |
| 2 | 6.302 | MM R  | 0.1938  | 10.74202  | 4.47064e-1 | 1.1825  |

**Figure S31.** HPLC trace for the racemic reference *rac*-7, and non-racemic product (*S*)-7.

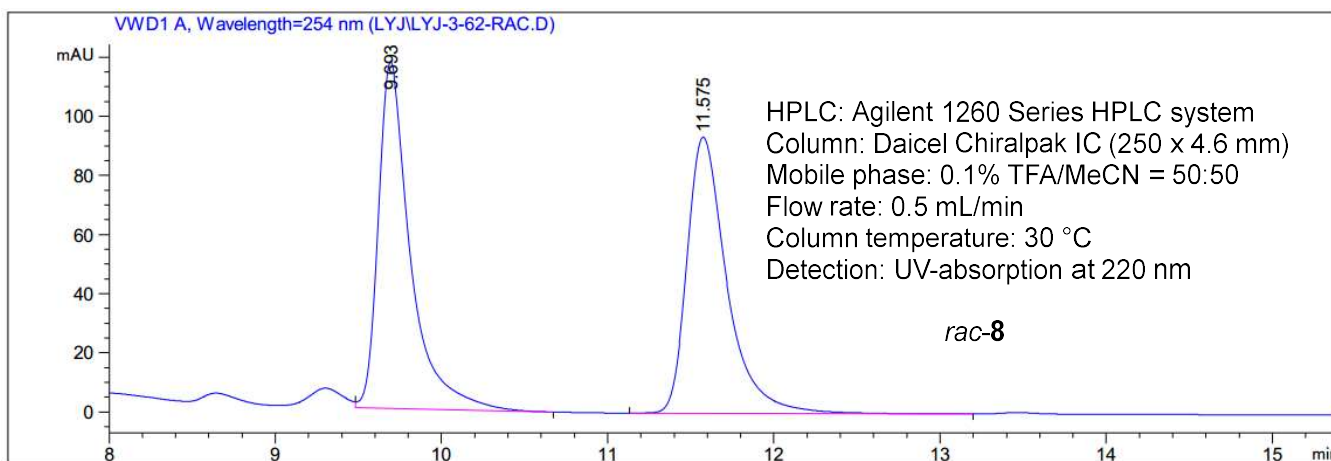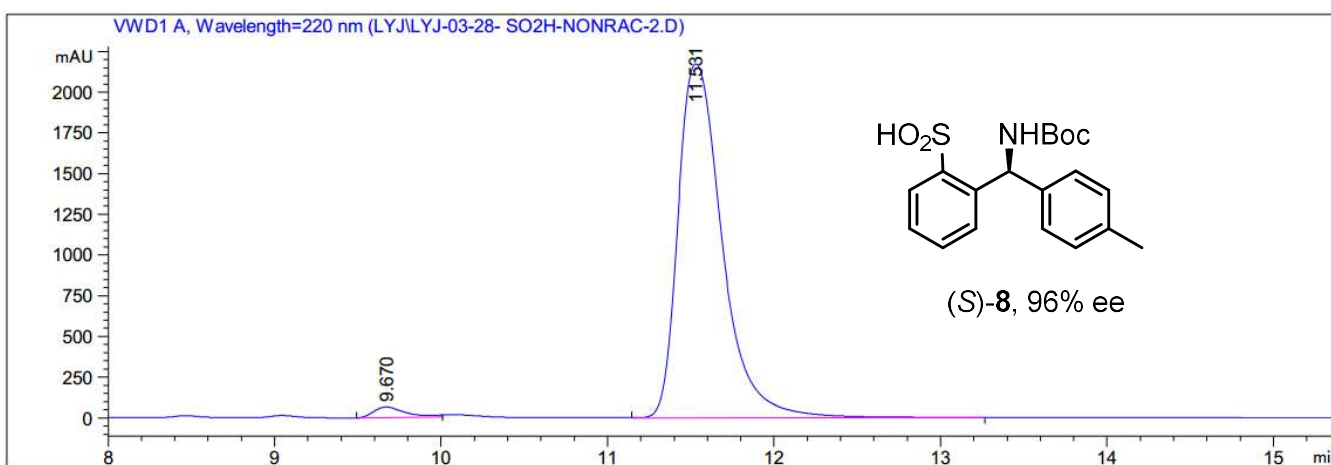

| # | [min]       | [min]  | [mAU*s]   | [mAU]      | %       |
|---|-------------|--------|-----------|------------|---------|
| 1 | 9.670 PM R  | 0.2217 | 856.84320 | 64.42195   | 2.0872  |
| 2 | 11.531 MM R | 0.3081 | 4.01955e4 | 2174.59497 | 97.9128 |

**Figure S32.** HPLC trace for the racemic reference *rac-8*, and non-racemic product (*S*)-8.

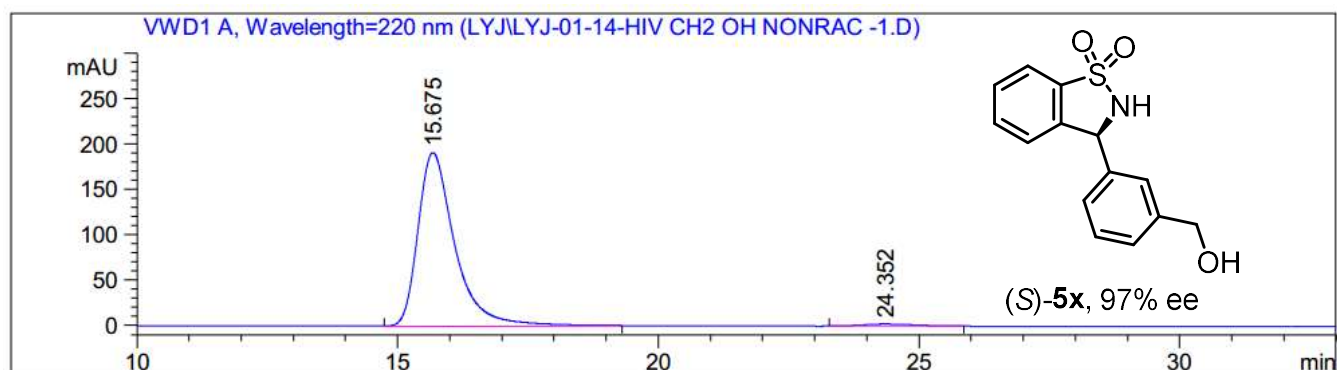

| # | [min]  | [min] | [mAU*s] | [mAU]      | %         |         |
|---|--------|-------|---------|------------|-----------|---------|
| 1 | 15.675 | MM R  | 0.8262  | 9489.67871 | 191.43466 | 98.3484 |
| 2 | 24.352 | PM R  | 1.1527  | 159.36311  | 2.30424   | 1.6516  |

**Figure S33.** HPLC trace for non-racemic product (S)-5x at half a gram-scale generated from the asymmetric reaction catalyzed by  $\Delta$ -IrC1a.



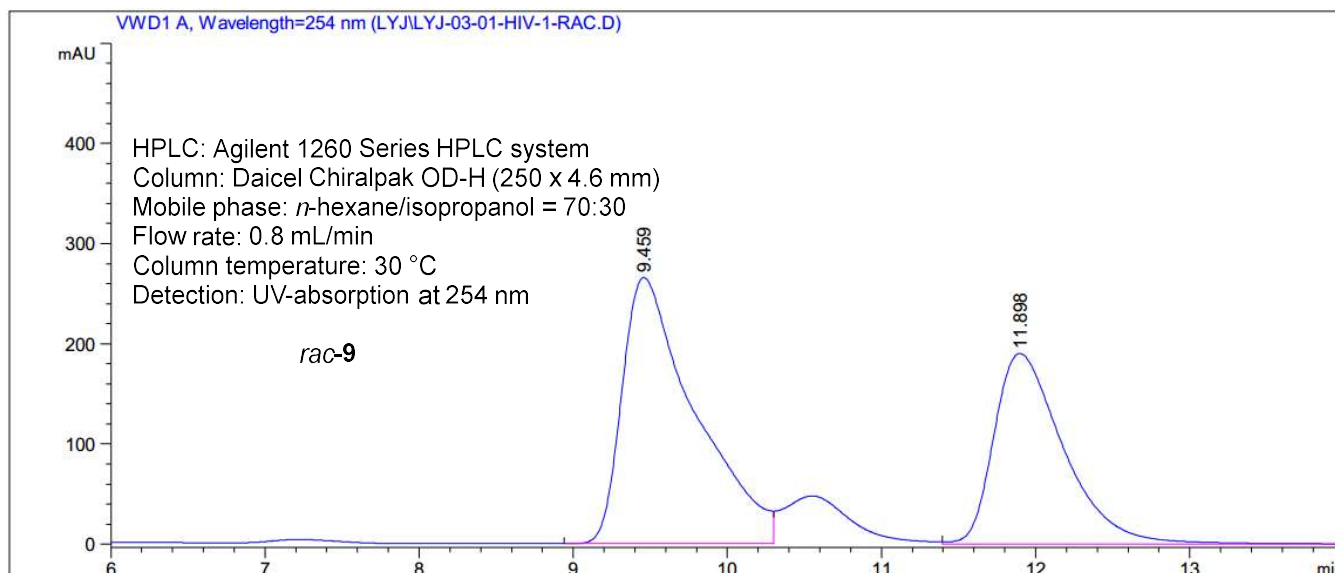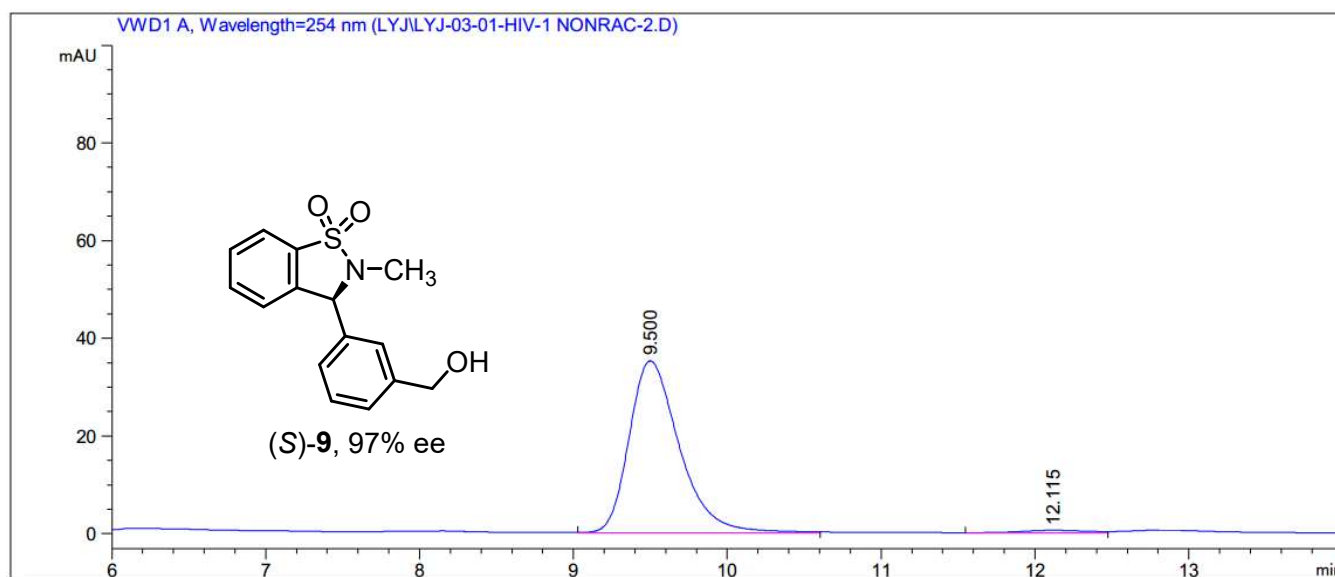

| # | [min]  | [min] | [mAU*s] | [mAU]     | %          |         |
|---|--------|-------|---------|-----------|------------|---------|
| 1 | 9.500  | MM R  | 0.3334  | 806.16553 | 35.28566   | 98.2560 |
| 2 | 12.115 | BV    | 0.4103  | 14.30922  | 4.99348e-1 | 1.7440  |

Figure S34. HPLC trace for the racemic reference *rac*-9, and non-racemic product (*S*)-9.

## 7. X-Ray Diffraction of *Rac-IrC1a*

**Crystallography of compound *rac-IrC1a*:** Single crystals of *rac-IrC1a* were obtained by slow diffusion from the solution in dichloroethane layered with *n*-hexane at room temperature. Data was collected on a Bruker Smart Apex CCD area detector employing graphite-monochromated Mo-K $\alpha$  radiation ( $\lambda = 0.71069 \text{ \AA}$ ) at 173 K. The structure was solved by SHELXL-97.<sup>10</sup> Refinement was done by full-matrix least squares based on F<sup>2</sup> data of one twin domain using SHELXL-97. The structure is shown on Figure S35. Crystallographic data for *rac-IrC1a* has been deposited with the Cambridge Crystallographic Data Centre as supplementary publication number CCDC 1538578.

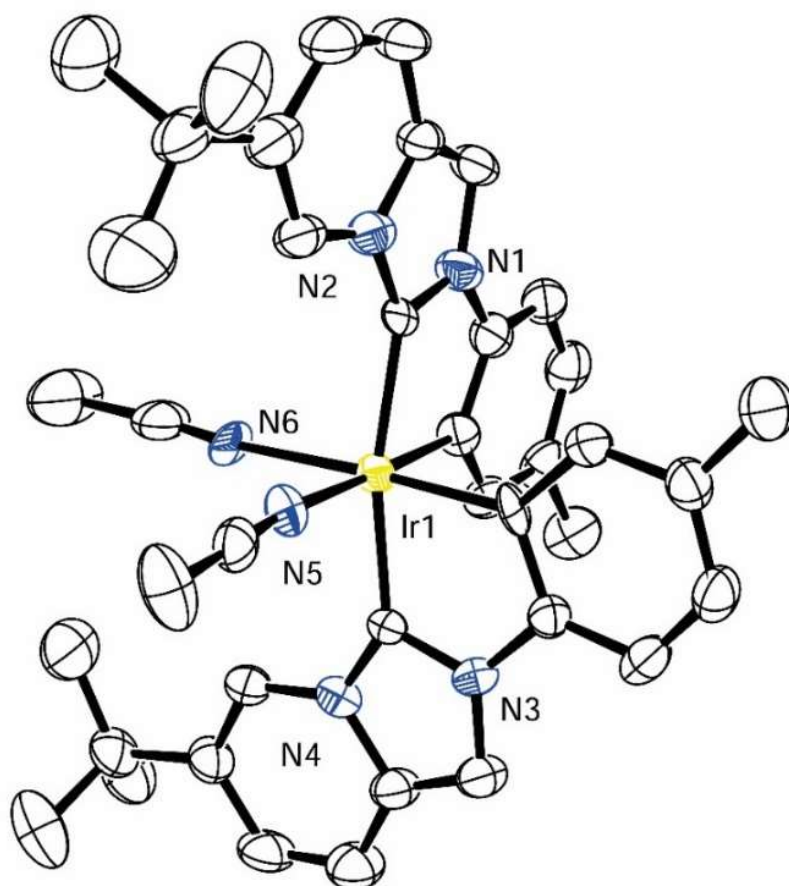

**Figure S35.** Crystal structure of compound *rac-IrC1a*.

**Table S2.** Crystal data and structure refinement for compound *rac-IrC1a*.

|                      |                                                                                               |                                                            |
|----------------------|-----------------------------------------------------------------------------------------------|------------------------------------------------------------|
| Identification code  | lyjm                                                                                          |                                                            |
| Empirical formula    | C <sub>42</sub> H <sub>48</sub> Cl <sub>2</sub> F <sub>6</sub> Ir <sub>1</sub> P <sub>1</sub> |                                                            |
| Formula weight       | 1044.93                                                                                       |                                                            |
| Temperature          | 173(2) K                                                                                      |                                                            |
| Wavelength           | 0.71073 $\text{\AA}$                                                                          |                                                            |
| Crystal system       | Monoclinic                                                                                    |                                                            |
| Space group          | Cc                                                                                            |                                                            |
| Unit cell dimensions | $a = 9.2337(17) \text{ \AA}$<br>$b = 28.914(5) \text{ \AA}$<br>$c = 16.672(3) \text{ \AA}$    | $a = 90^\circ$<br>$b = 102.310(3)^\circ$<br>$g = 90^\circ$ |
| Volume               | $4348.7(14) \text{ \AA}^3$                                                                    |                                                            |
| Z                    | 4                                                                                             |                                                            |
| Density (calculated) | $1.596 \text{ Mg/m}^3$                                                                        |                                                            |

|                                   |                                             |
|-----------------------------------|---------------------------------------------|
| Absorption coefficient            | 3.293 mm <sup>-1</sup>                      |
| F(000)                            | 2088                                        |
| Crystal size                      | 0.32 x 0.23 x 0.15 mm <sup>3</sup>          |
| Theta range for data collection   | 1.41 to 25.99°.                             |
| Index ranges                      | -11<=h<=11, -35<=k<=34, -20<=l<=20          |
| Reflections collected             | 16283                                       |
| Independent reflections           | 8171 [R(int) = 0.0219]                      |
| Completeness to theta = 26.00°    | 99.1 %                                      |
| Absorption correction             | Empirical                                   |
| Max. and min. transmission        | 0.6379 and 0.4188                           |
| Refinement method                 | Full-matrix least-squares on F <sup>2</sup> |
| Data / restraints / parameters    | 8171 / 2 / 523                              |
| Goodness-of-fit on F <sup>2</sup> | 1.002                                       |
| Final R indices [I>2sigma(I)]     | R1 = 0.0346, wR2 = 0.0910                   |
| R indices (all data)              | R1 = 0.0364, wR2 = 0.0920                   |
| Absolute structure parameter      | 0.00                                        |
| Largest diff. peak and hole       | 1.201 and -0.634 e.Å <sup>-3</sup>          |

## 8. References

- 1 H. Huo, X. Shen, C. Wang, L. Zhang, P. Röse, L.-A. Chen, K. Harms, M. Marsch, G. Hilt and E. Meggers, *Nature*, 2014, **515**, 100.
- 2 L. Xu, H. Shu, Y. Liu, S.-H Zhang and M. L. Trudell, *Tetrahedron*, 2006, **62**, 7902.
- 3 X.-Y. Li, Y. Dong, F.-Y. Qu and G. Liu, *J. Org. Chem.*, 2015, **80**, 790.
- 4 (a) D. G. Stark, C. M. Young, T. J. C. O'Riordan, A. M. Z. Slawin and A. D. Smith, *Org. Biomol. Chem.*, 2016, **14**, 8068; (b) D. Enders and M. Seppelt, *Synlett*, 2011, **3**, 402.
- 5 (a) H. B. Hepburn and H. W. Lam, *Angew. Chem. Int. Ed.*, 2014, **53**, 11605; (b) J. I. Martínez, J. J. Smith, H. B. Hepburn and H. W. Lam, *Angew. Chem. Int. Ed.*, 2016, **55**, 1108; (c) B. Song, C.-B. Yu, W.-X. Huang, M.-W. Chen and Y.-G. Zhou, *Org. Lett.*, 2015, **17**, 190; (d) C. A. Osborne, T. B. D. Endean and E. R. Jarvo, *Org. Lett.*, 2015, **17**, 5340.
- 6 C.-B. Yu, D.-W. Wang and Y.-G. Zhou, *J. Org. Chem.*, 2009, **74**, 5633.
- 7 C. K. F. Hermman, J. A. Compbell, T. D. Greenwood, J. A. Lewis and J. F. Wolfe, *J. Org. Chem.*, 1992, **57**, 5328.
- 8 M. Ichinose, H. Suematsu, Y. Yasutomi, Y. Nishioka, T. Uchida and T. Katsuki, *Angew. Chem. Int. Ed.*, 2011, **50**, 9884.
- 9 J. A. Fernández-Salas, M. M. Rodríguez-Fernández, M. C. Maestro and J. L. García-Ruano, *Chem. Commun.*, 2014, **50**, 6046.
- 10 G. M. Sheldrick, *Acta Cryst.*, 2008, **A64**, 112.

## 9. $^1\text{H}$ and $^{13}\text{C}$ NMR Spectrum

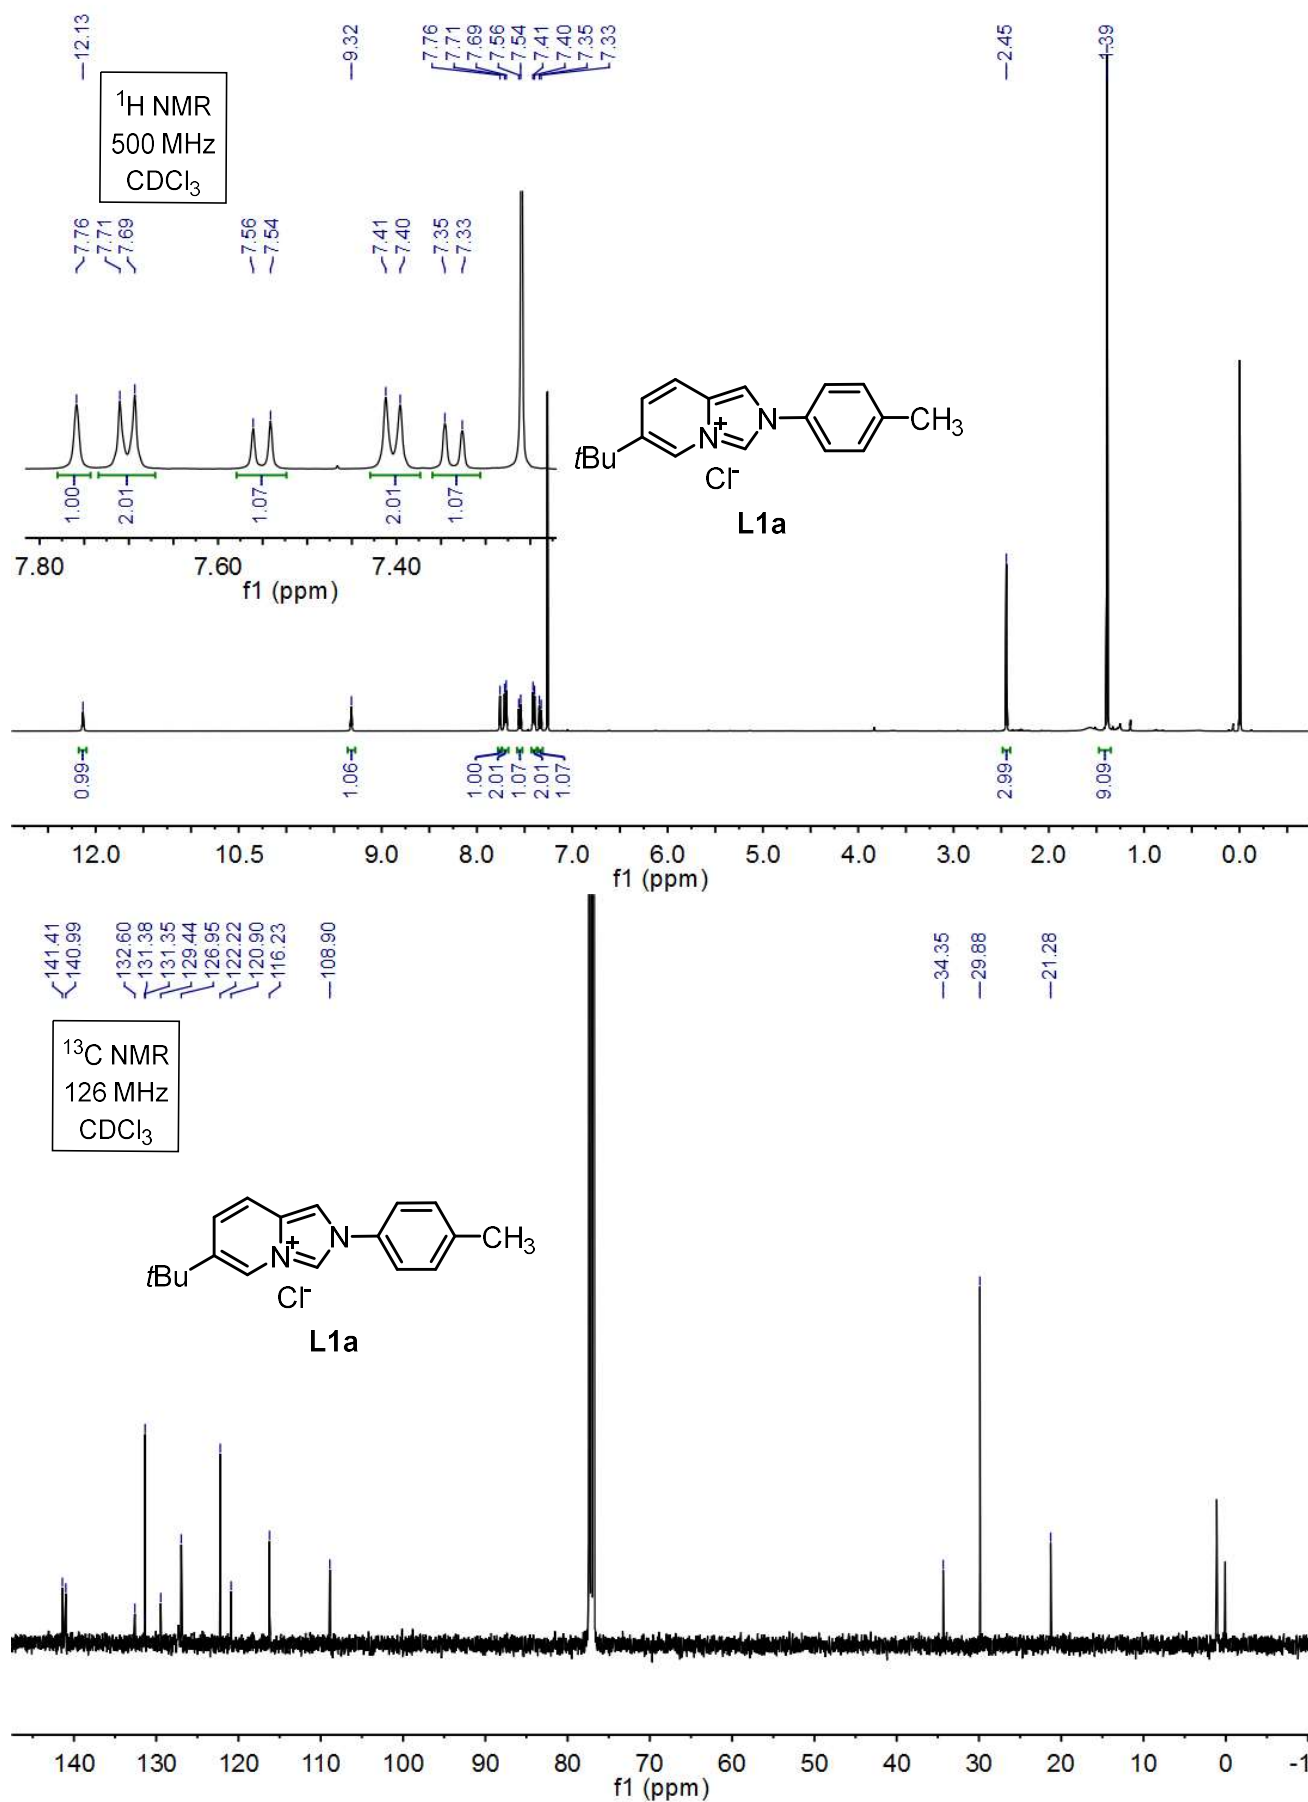

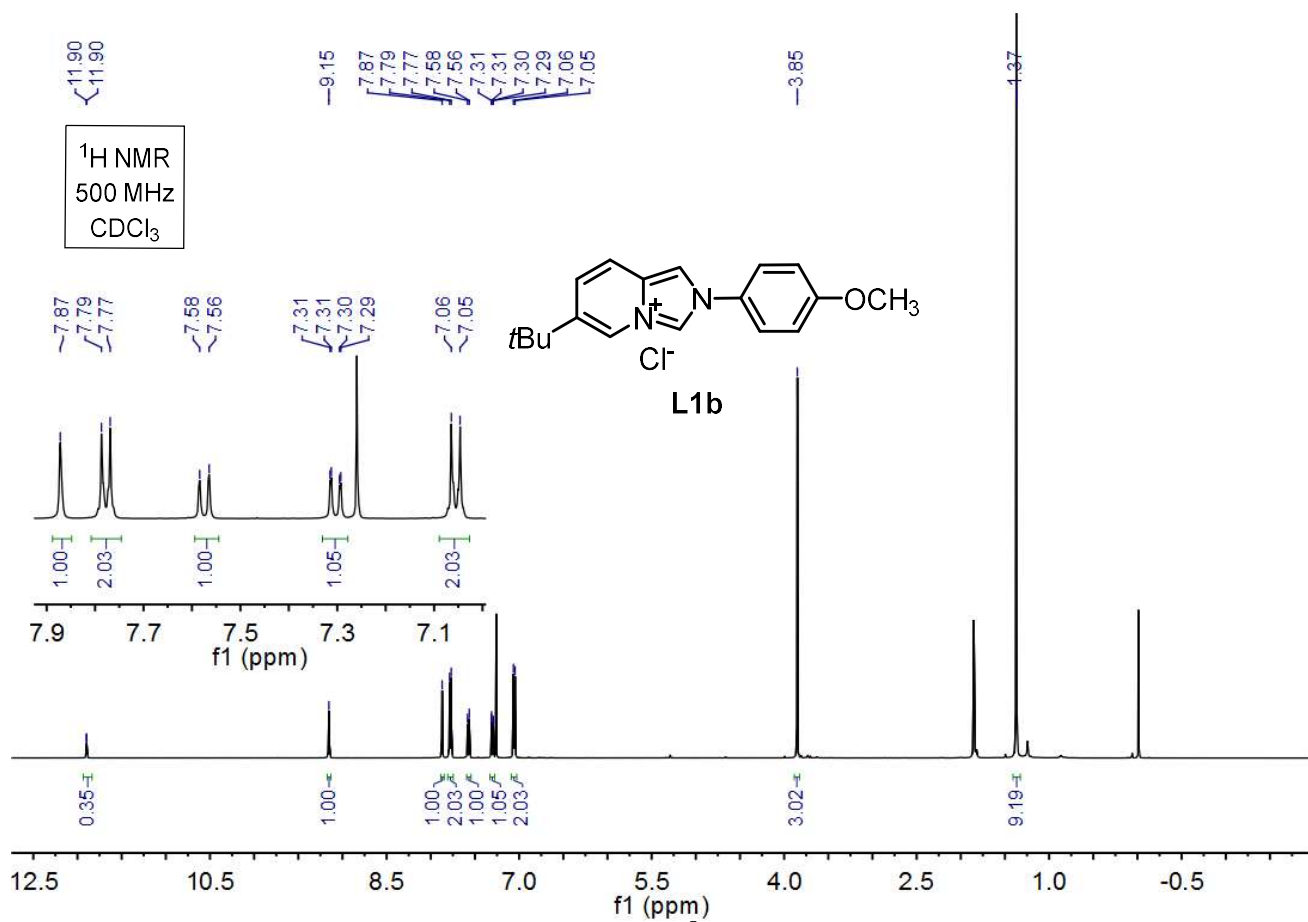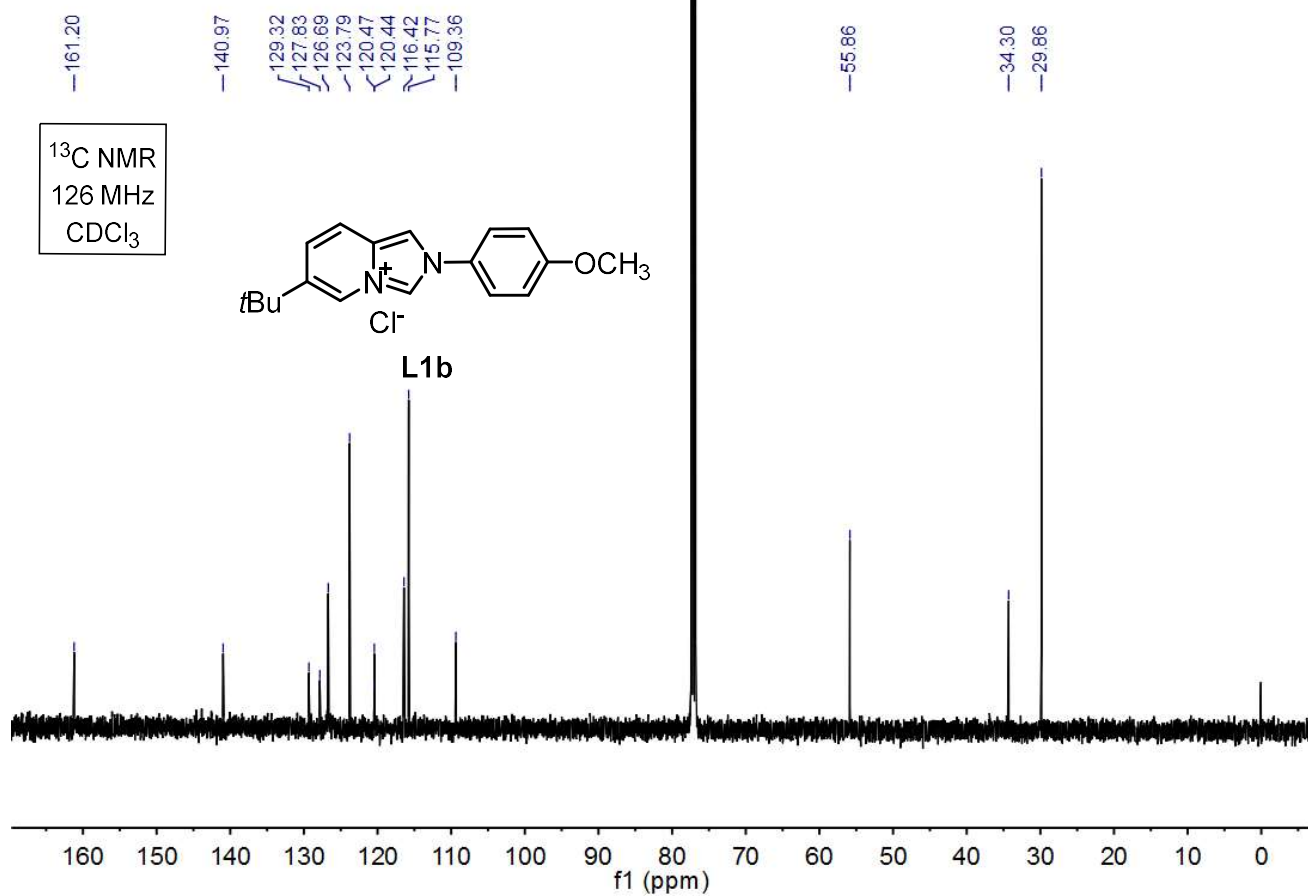

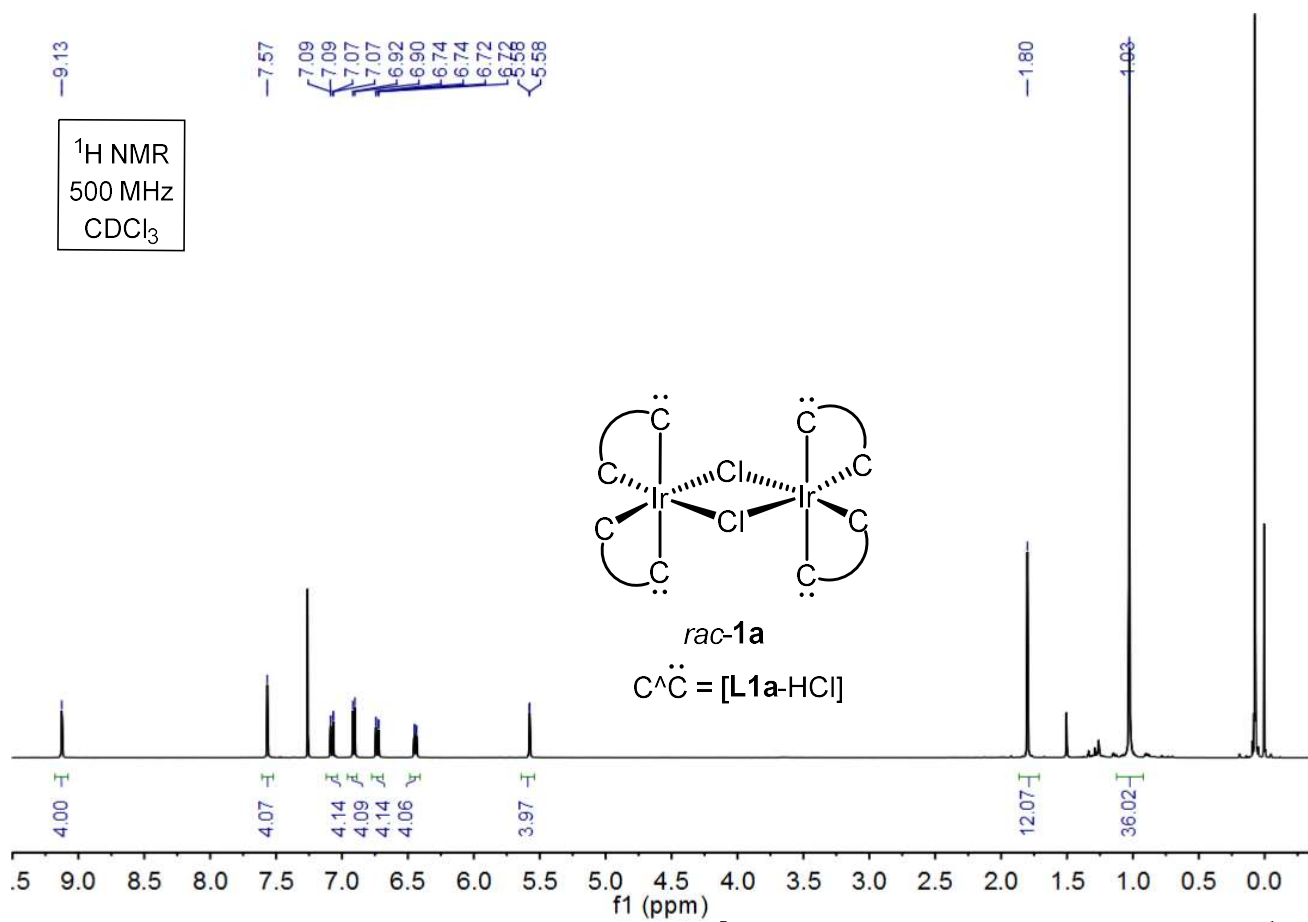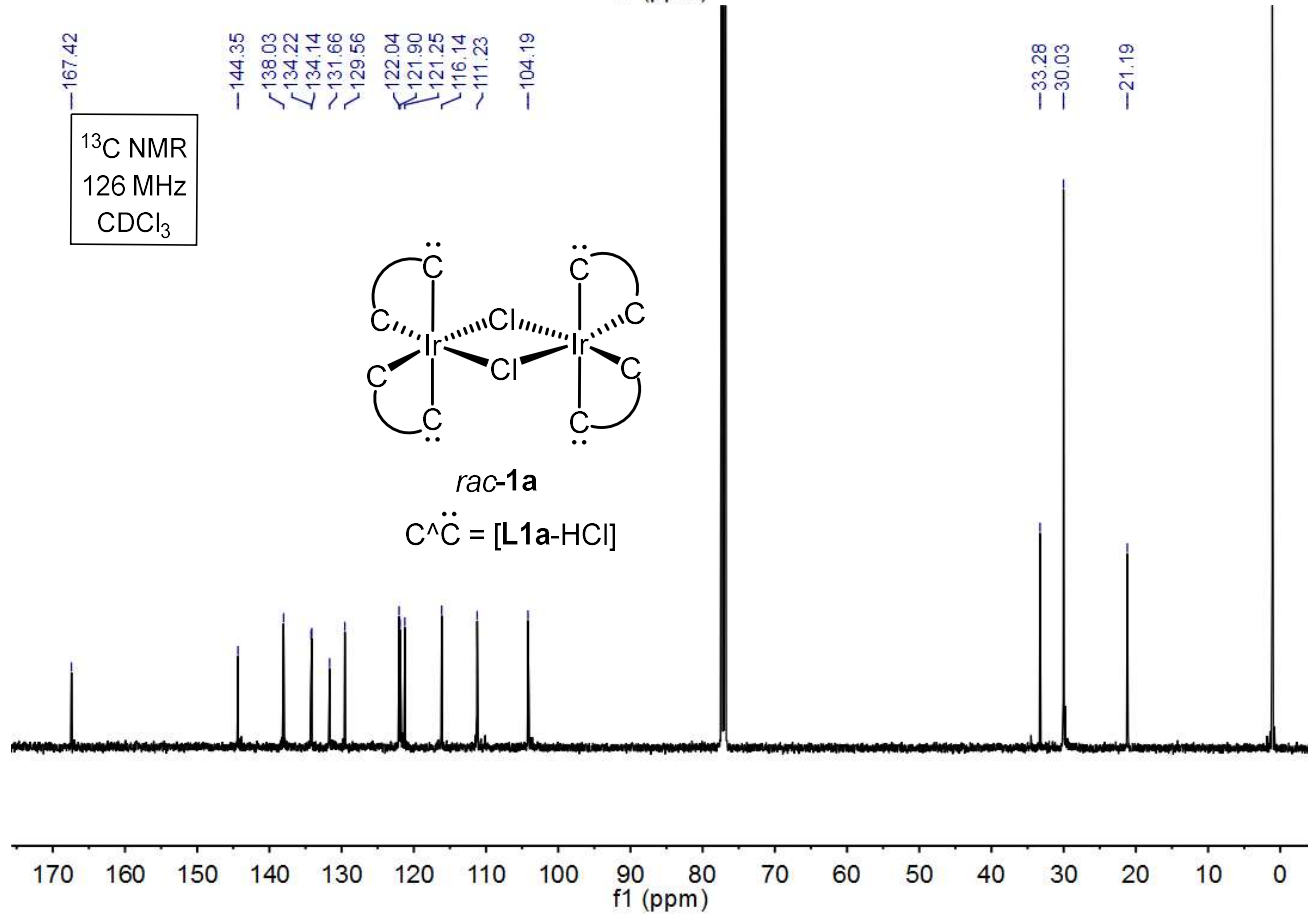

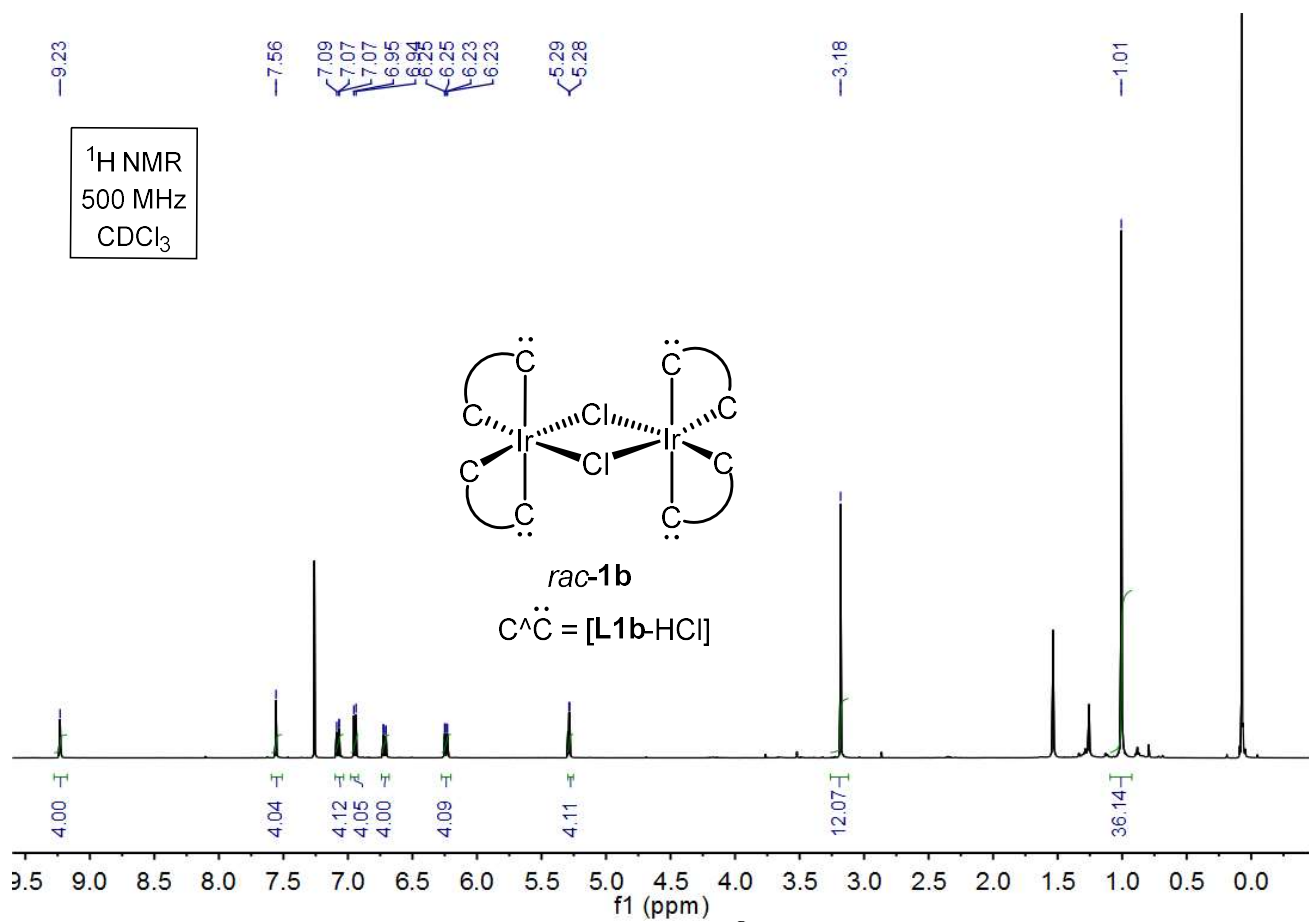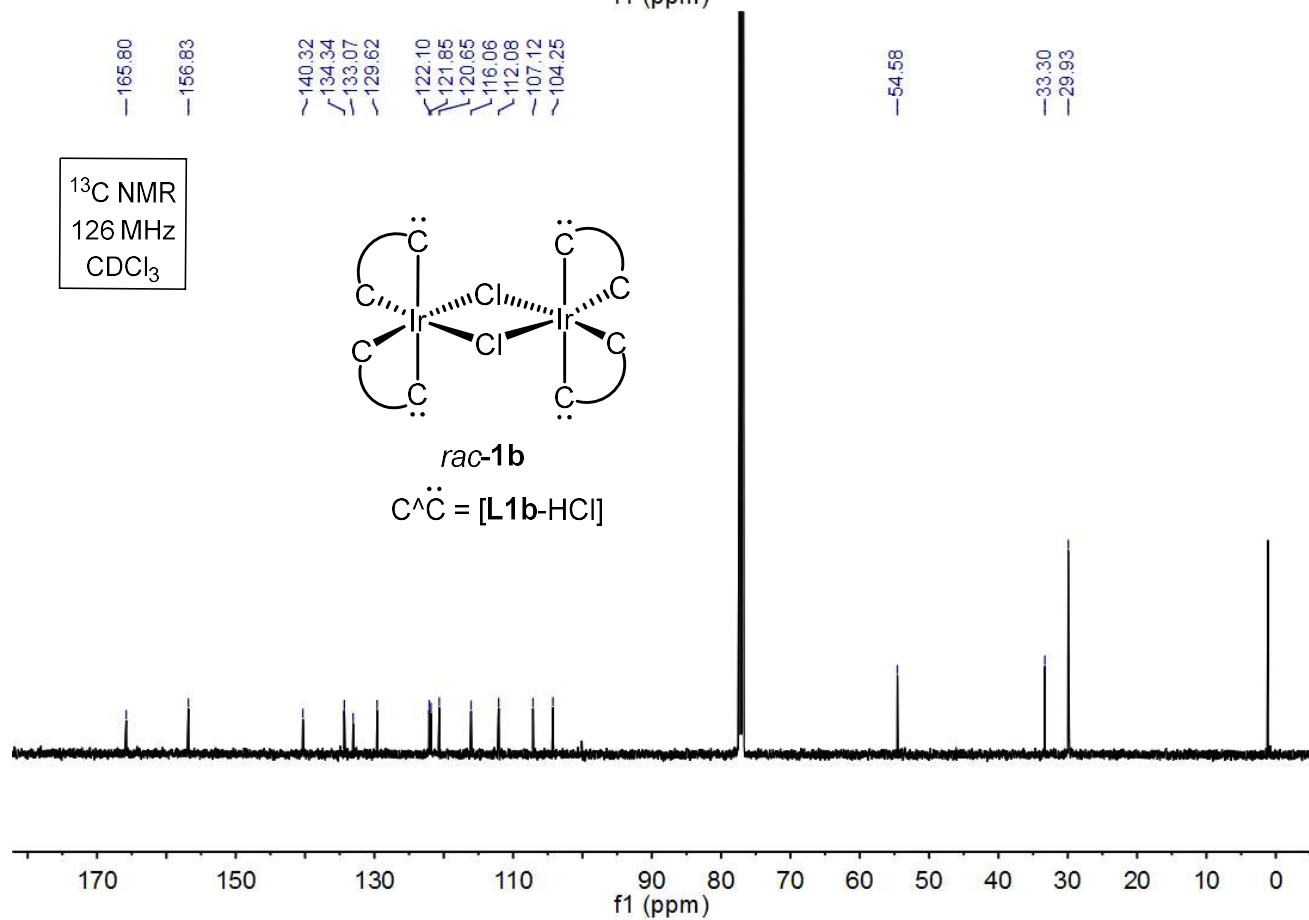



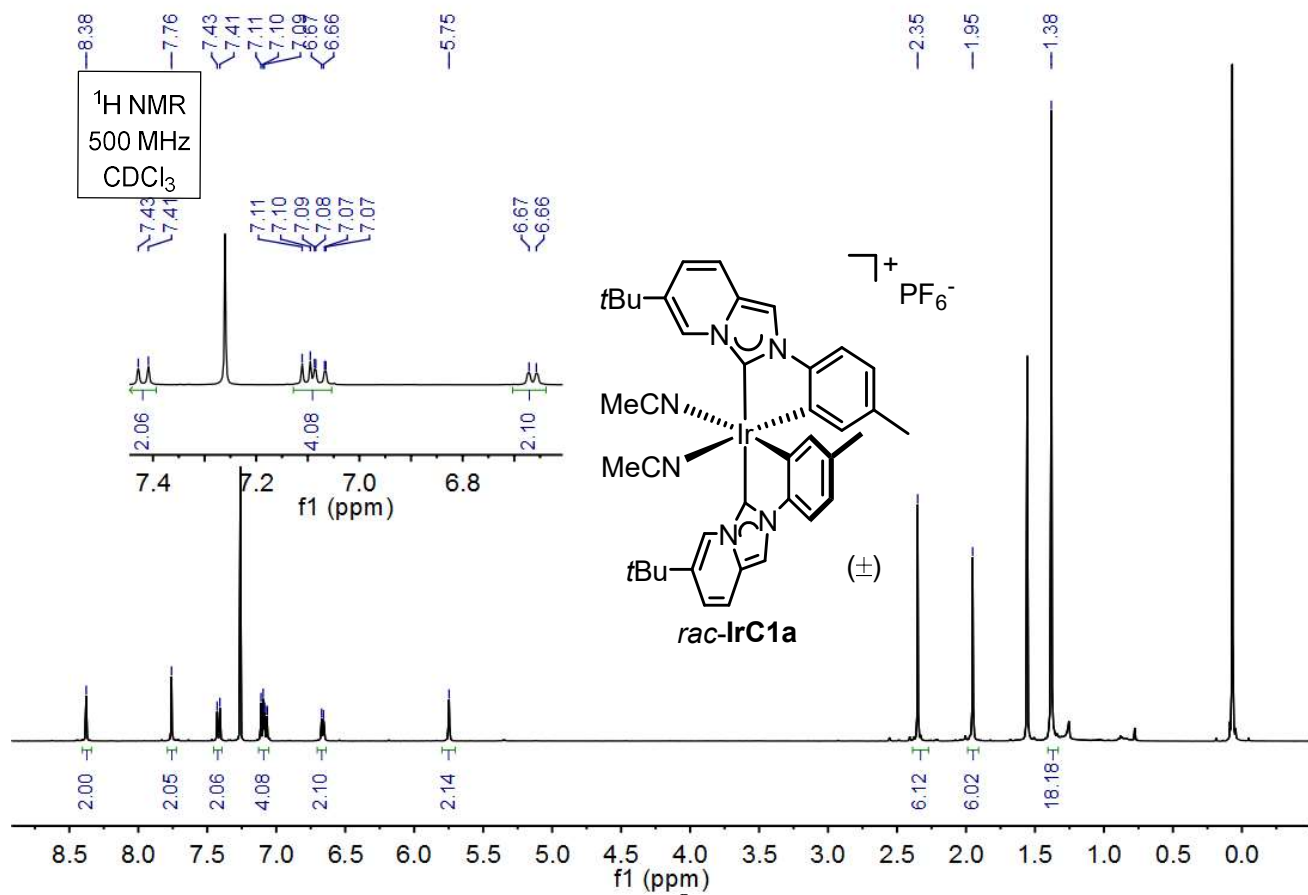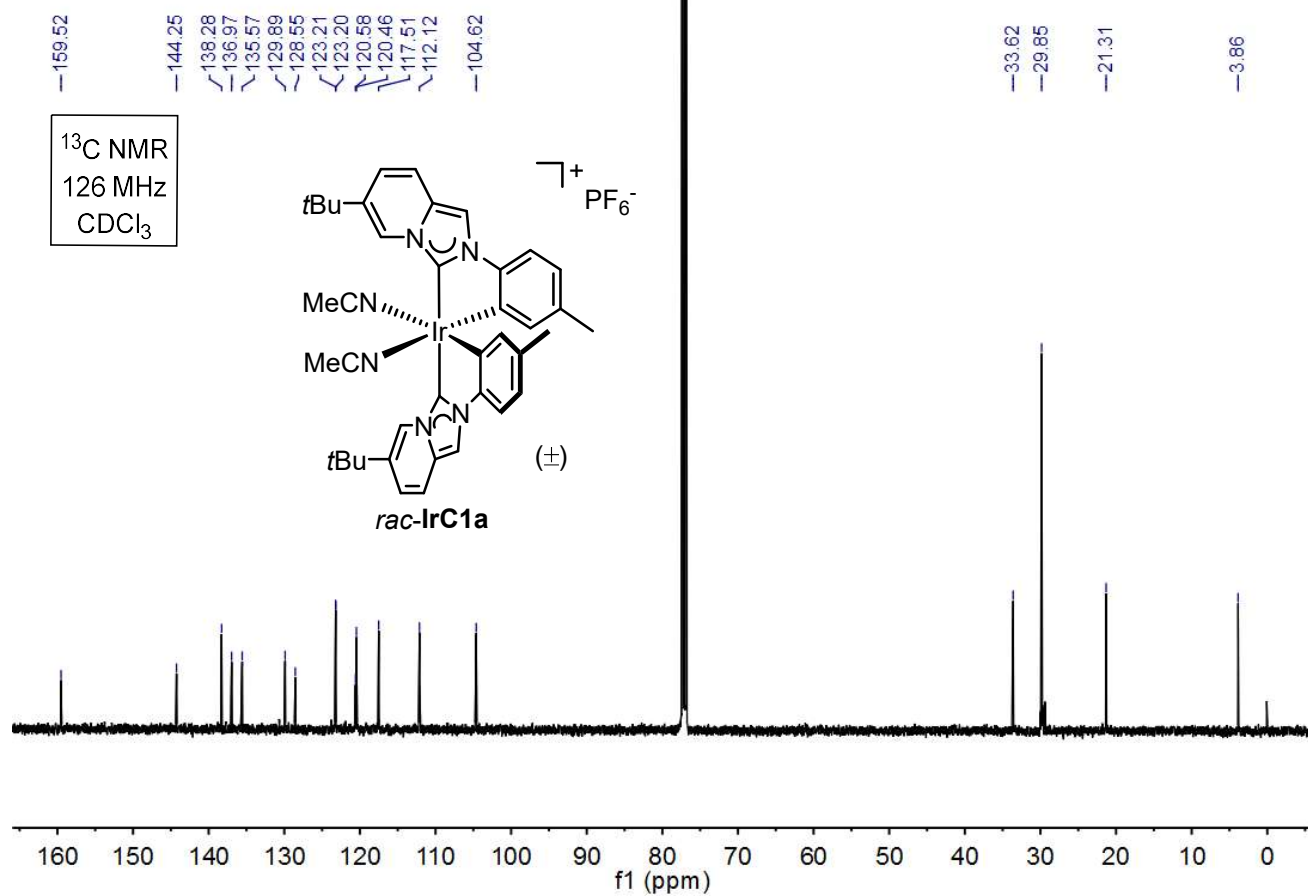

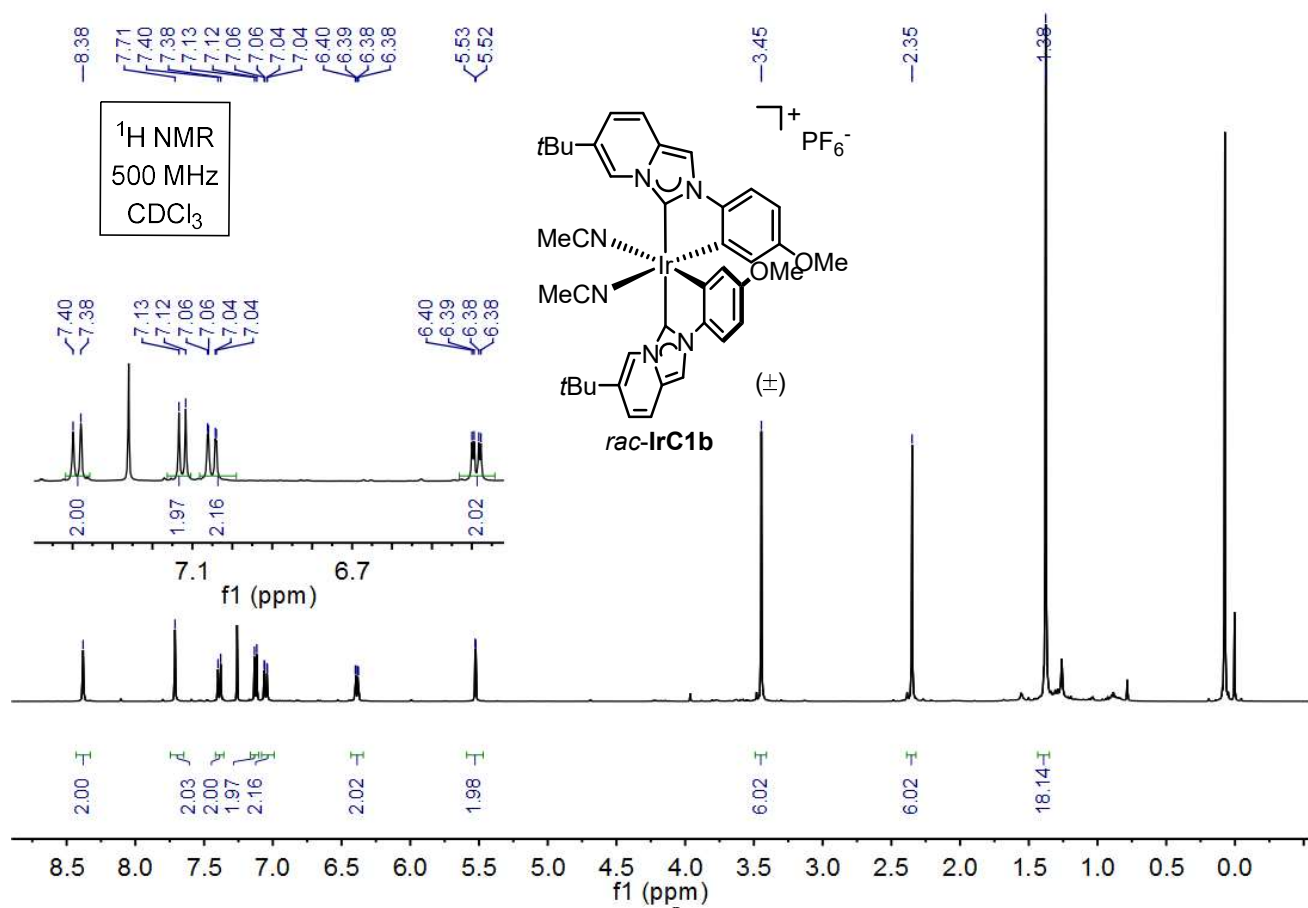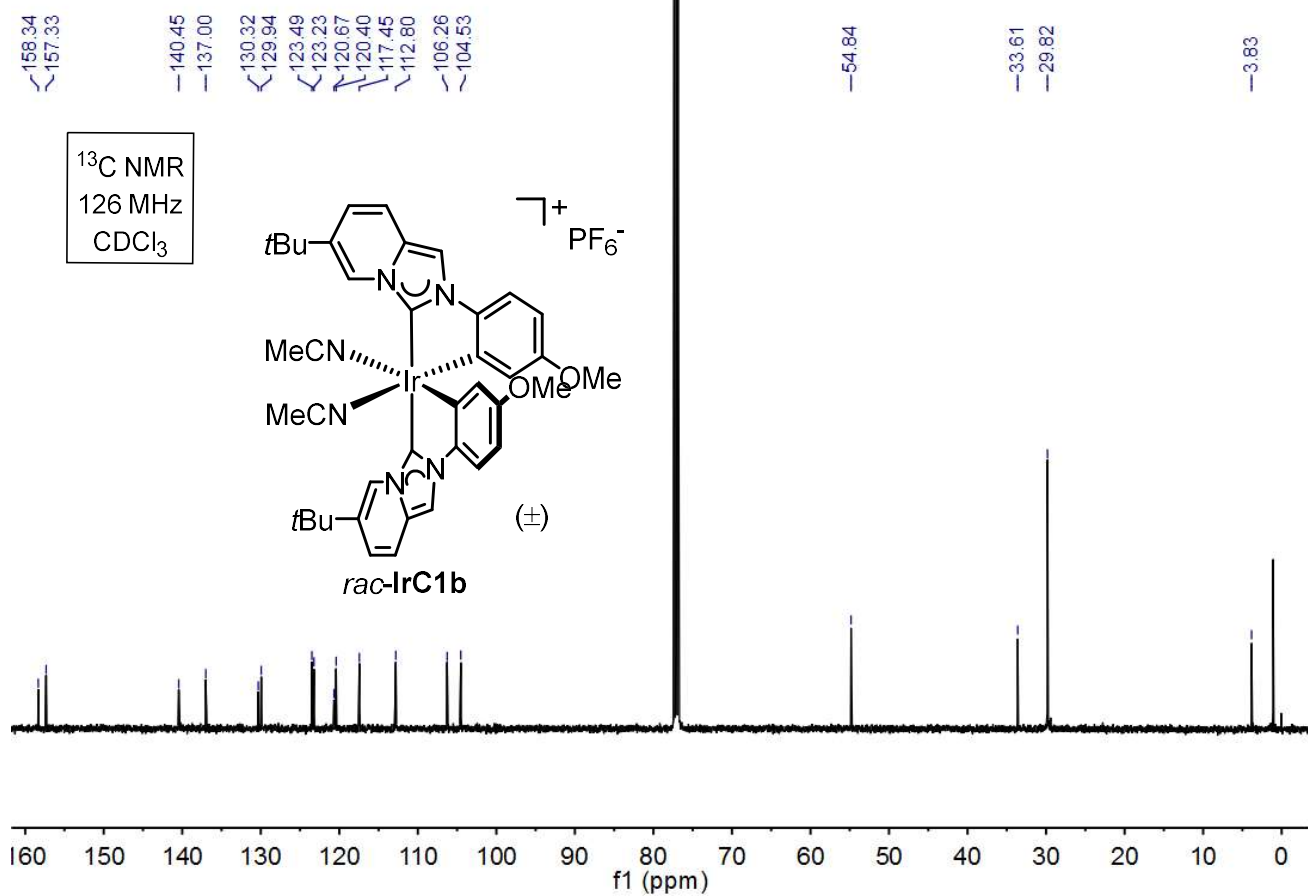

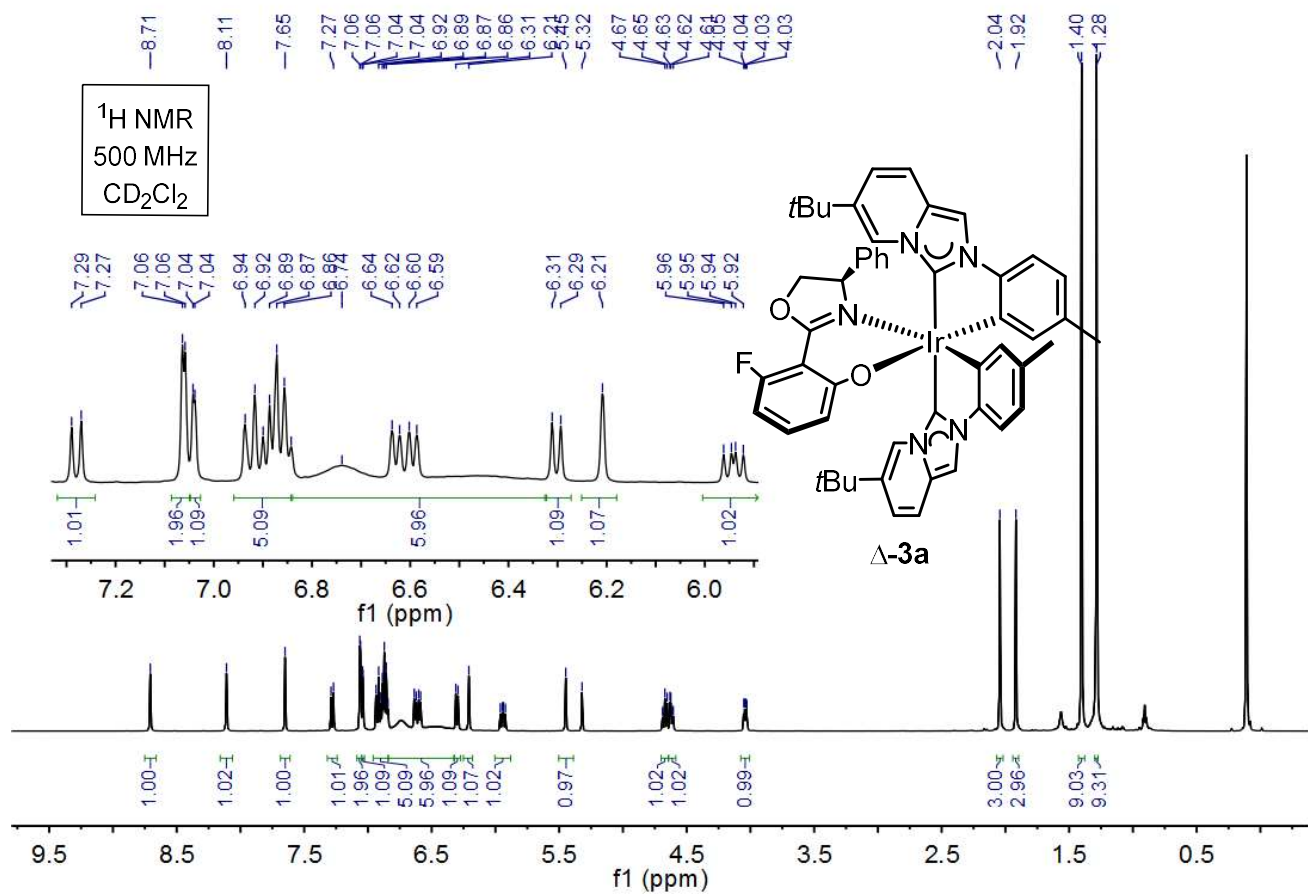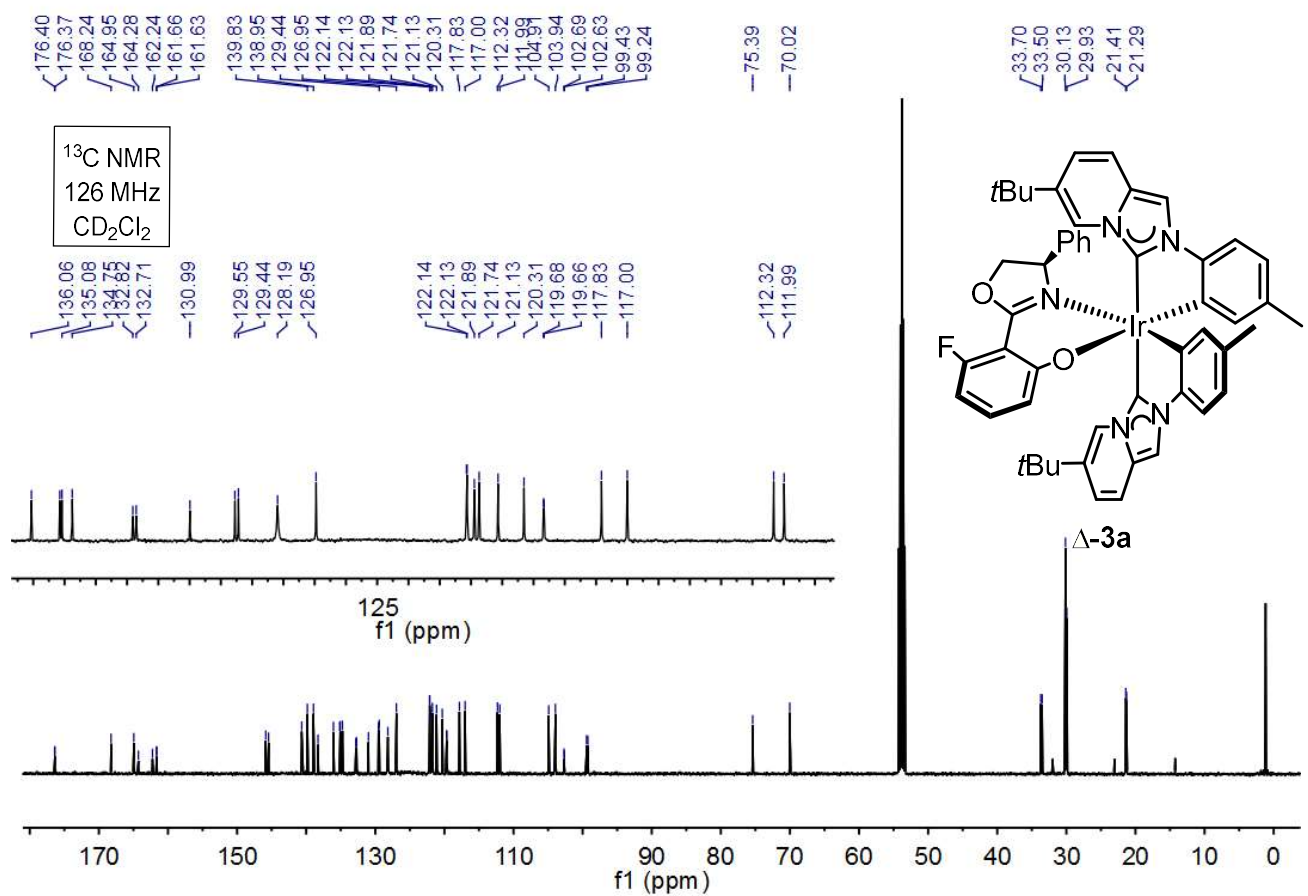

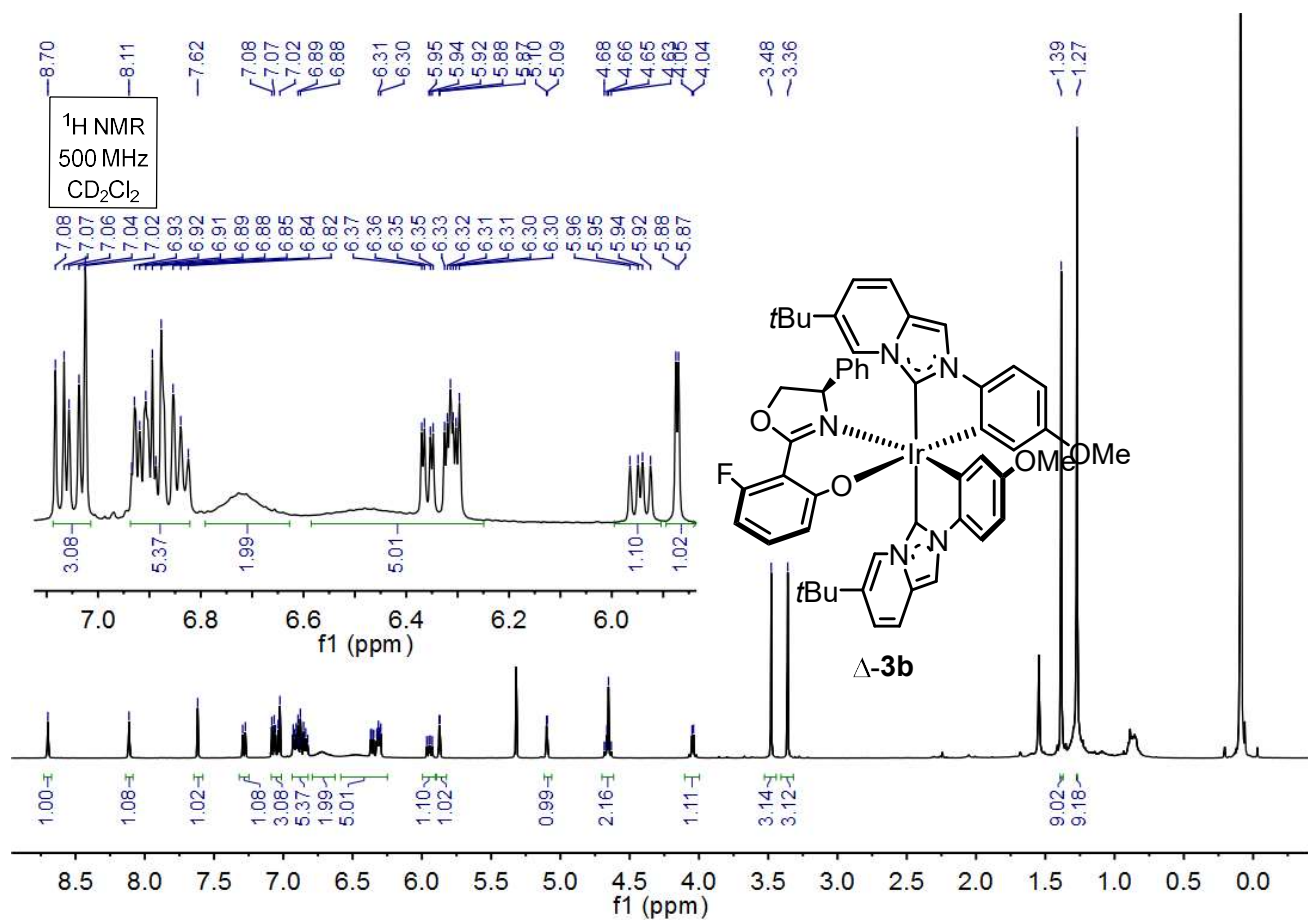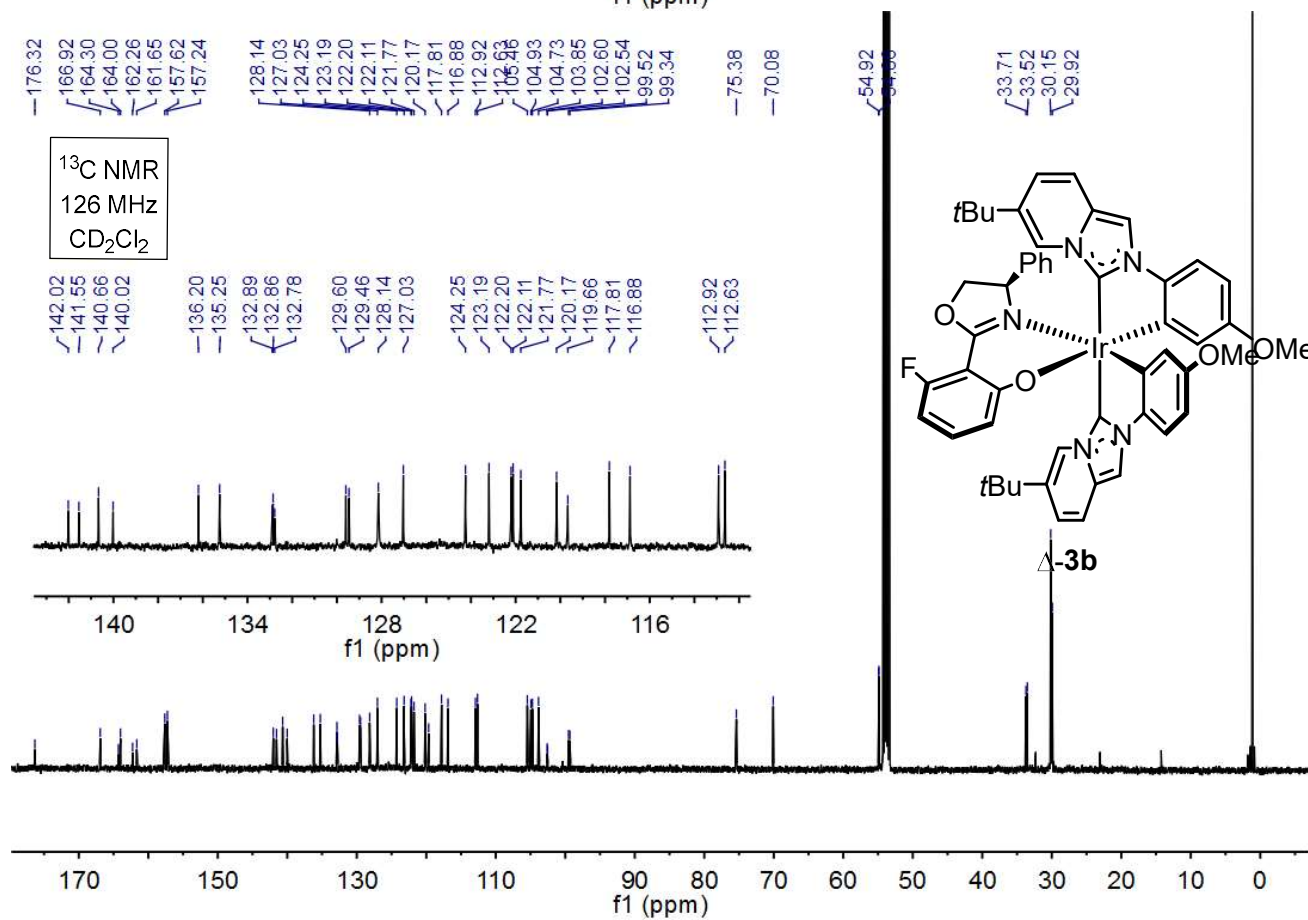

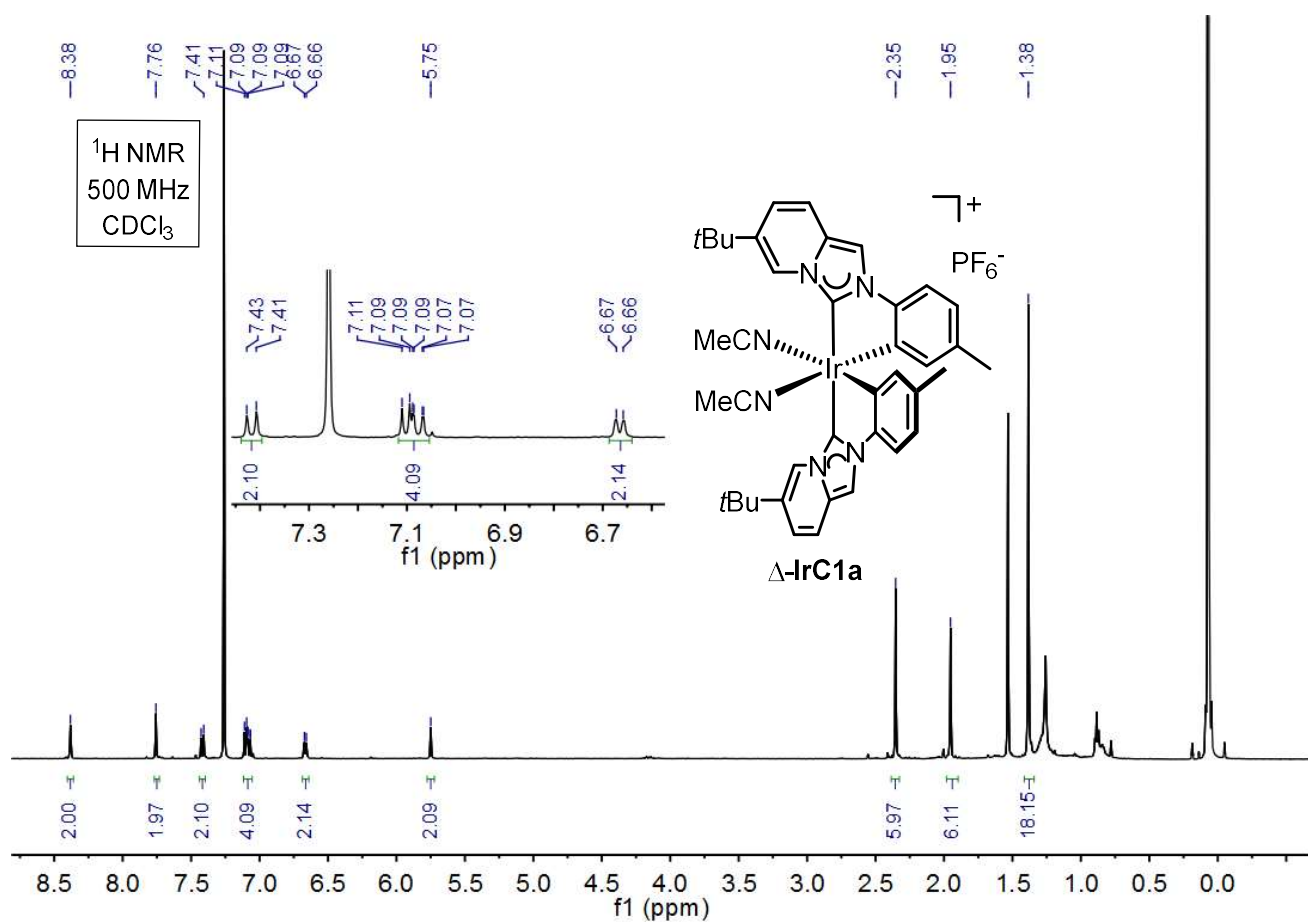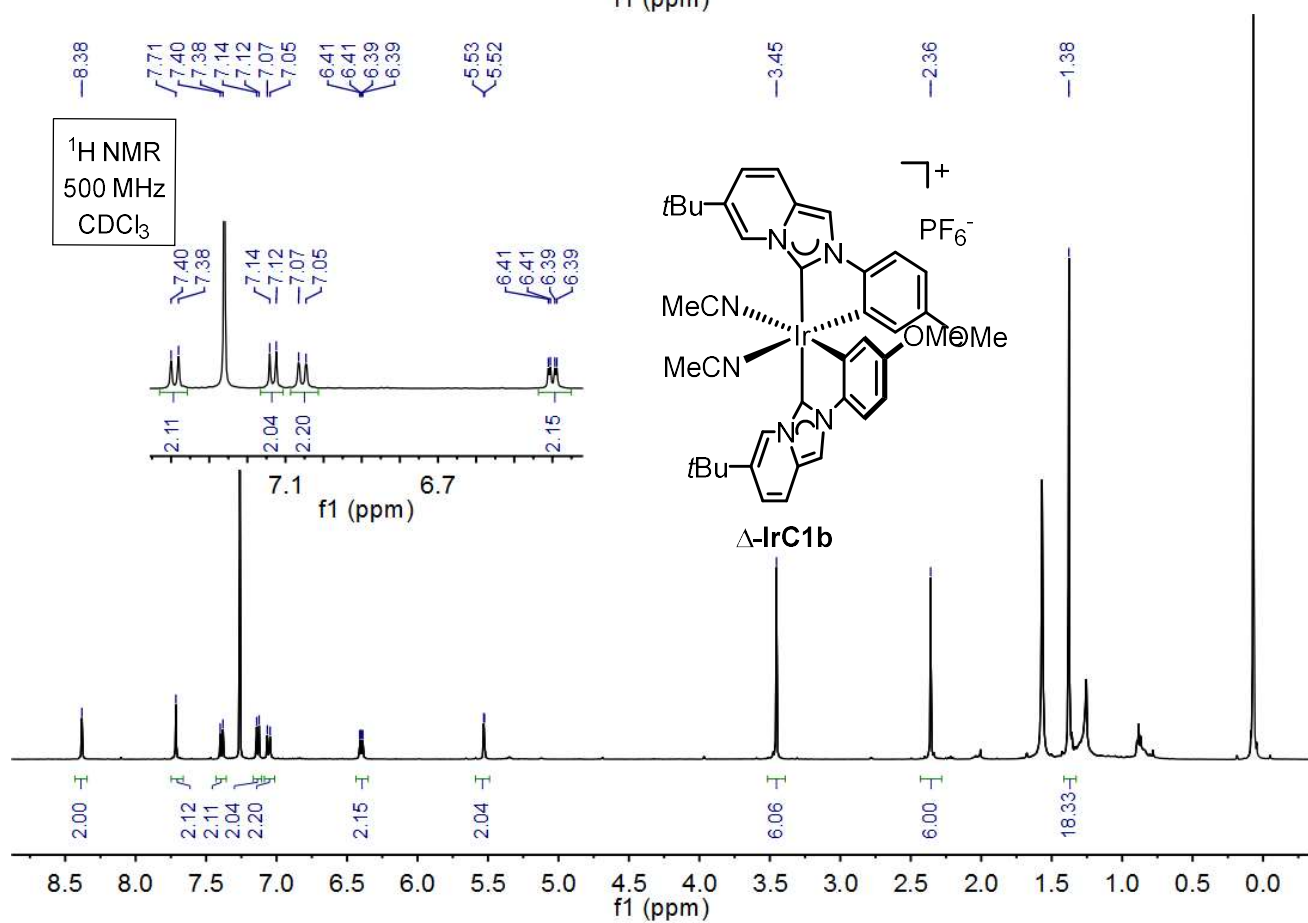

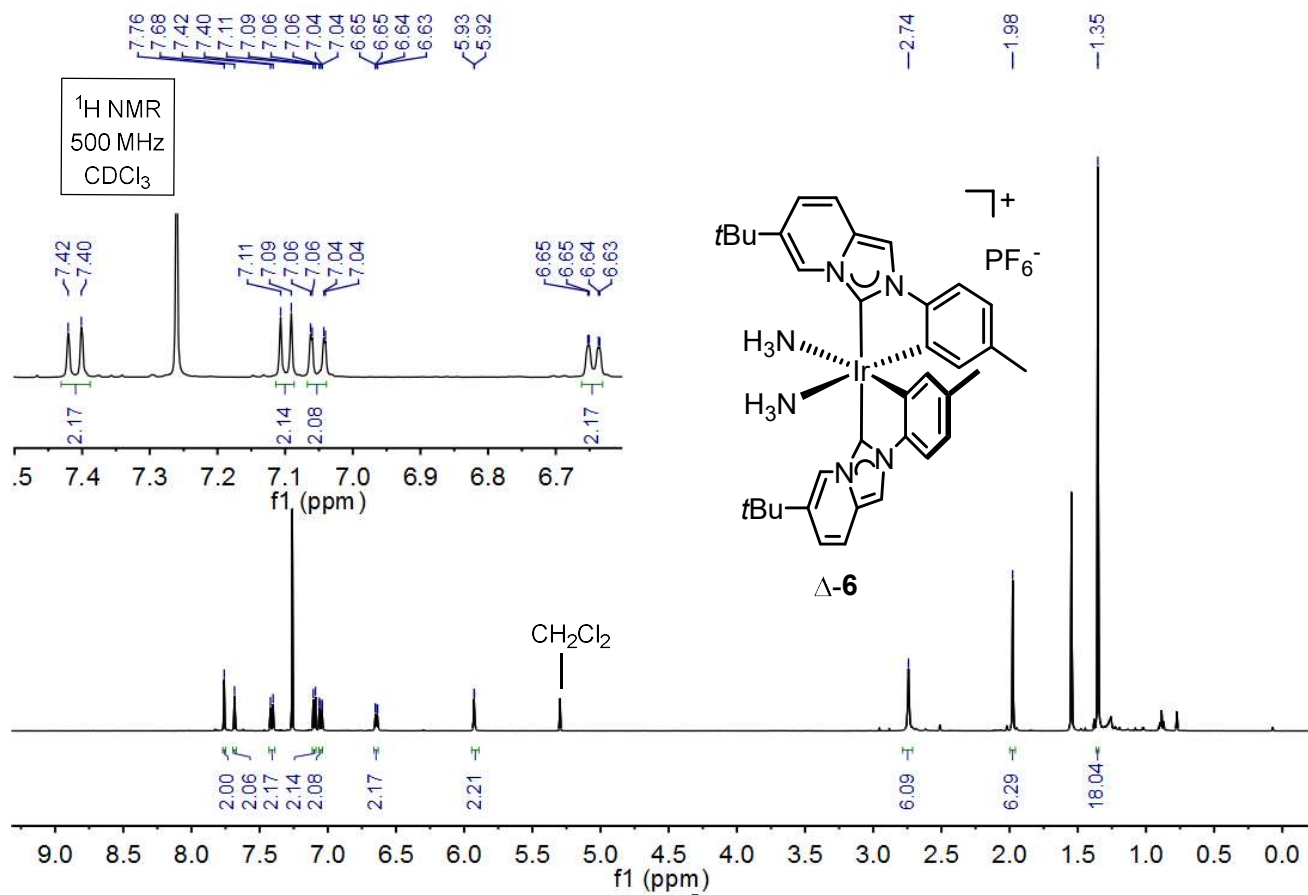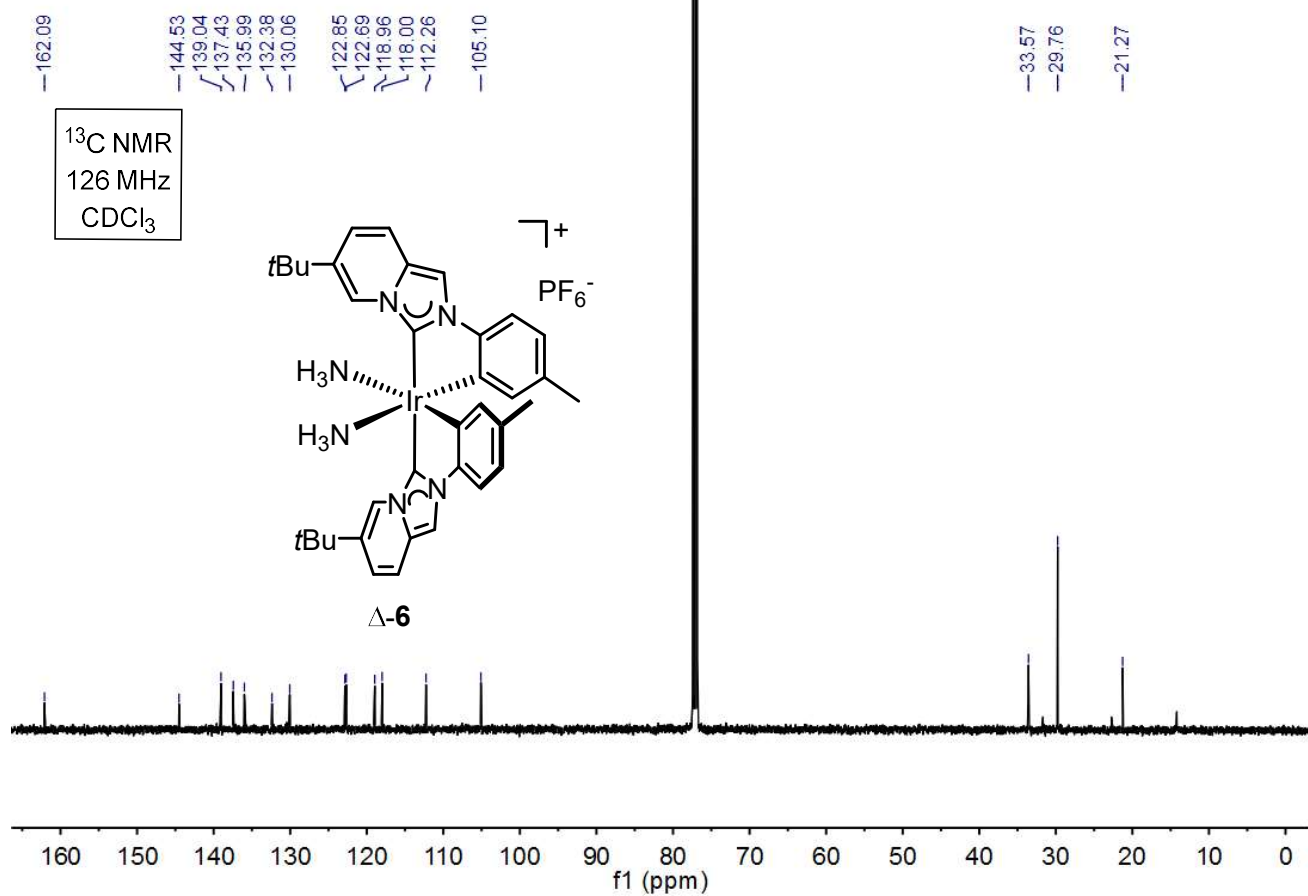

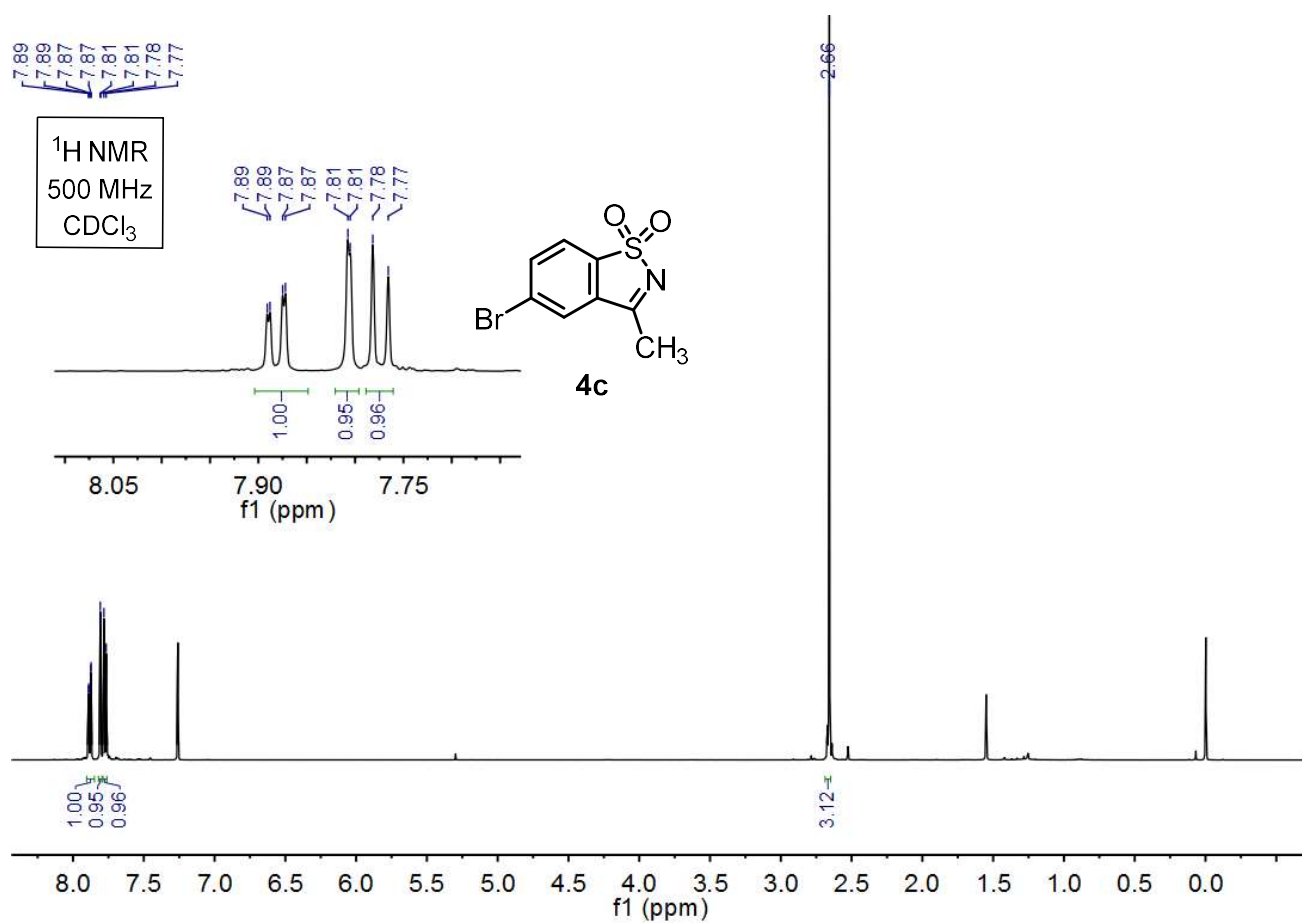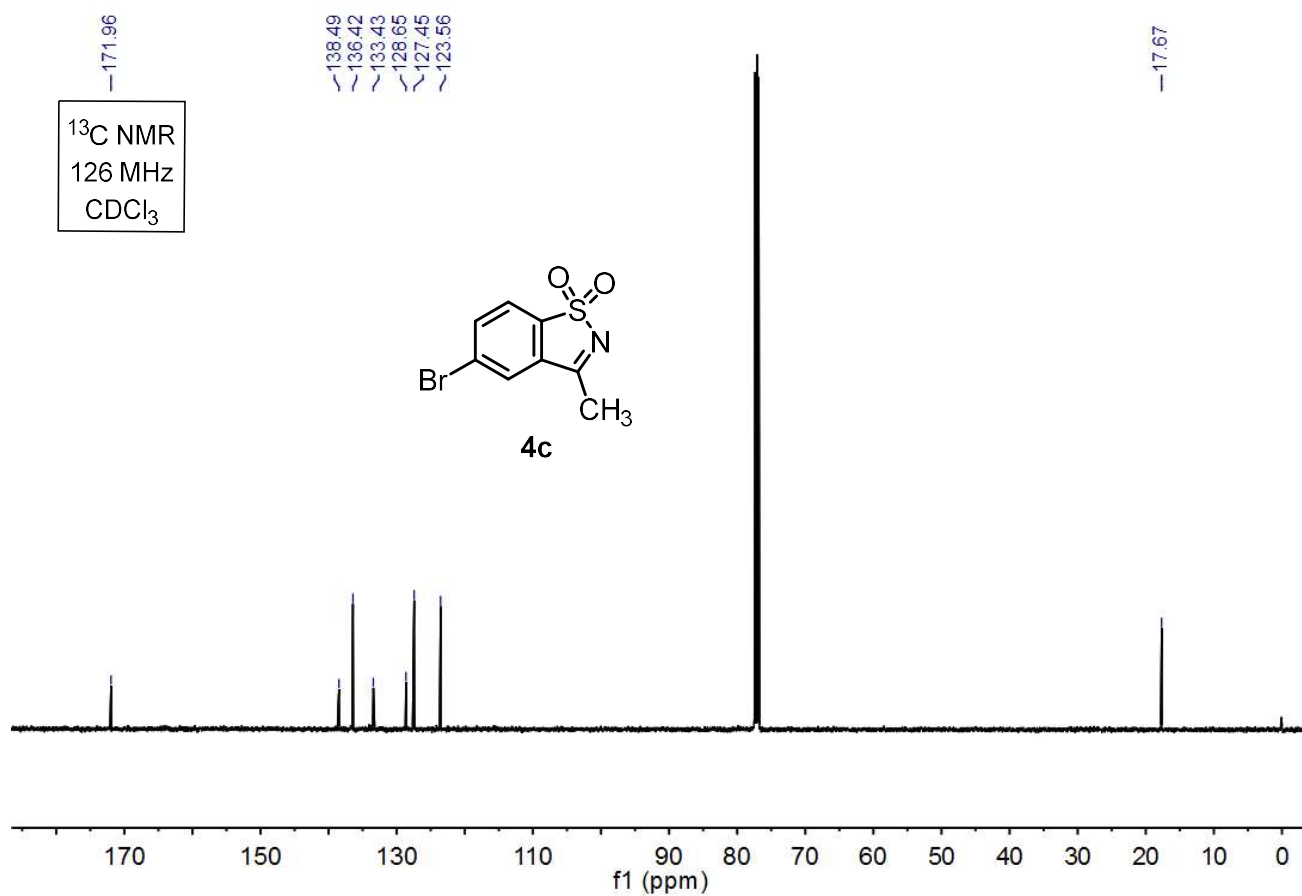

7.84  
7.83  
7.62  
7.61  
7.59  
7.58  
7.56

<sup>1</sup>H NMR  
500 MHz  
CDCl<sub>3</sub>

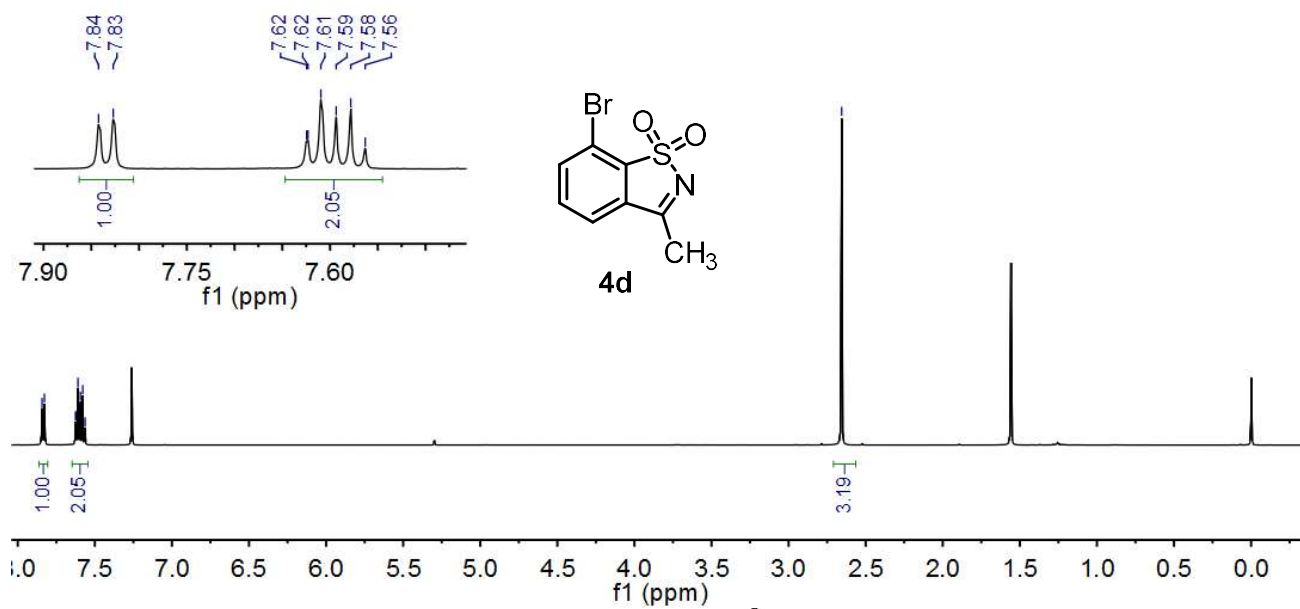

<sup>13</sup>C NMR  
126 MHz  
CDCl<sub>3</sub>

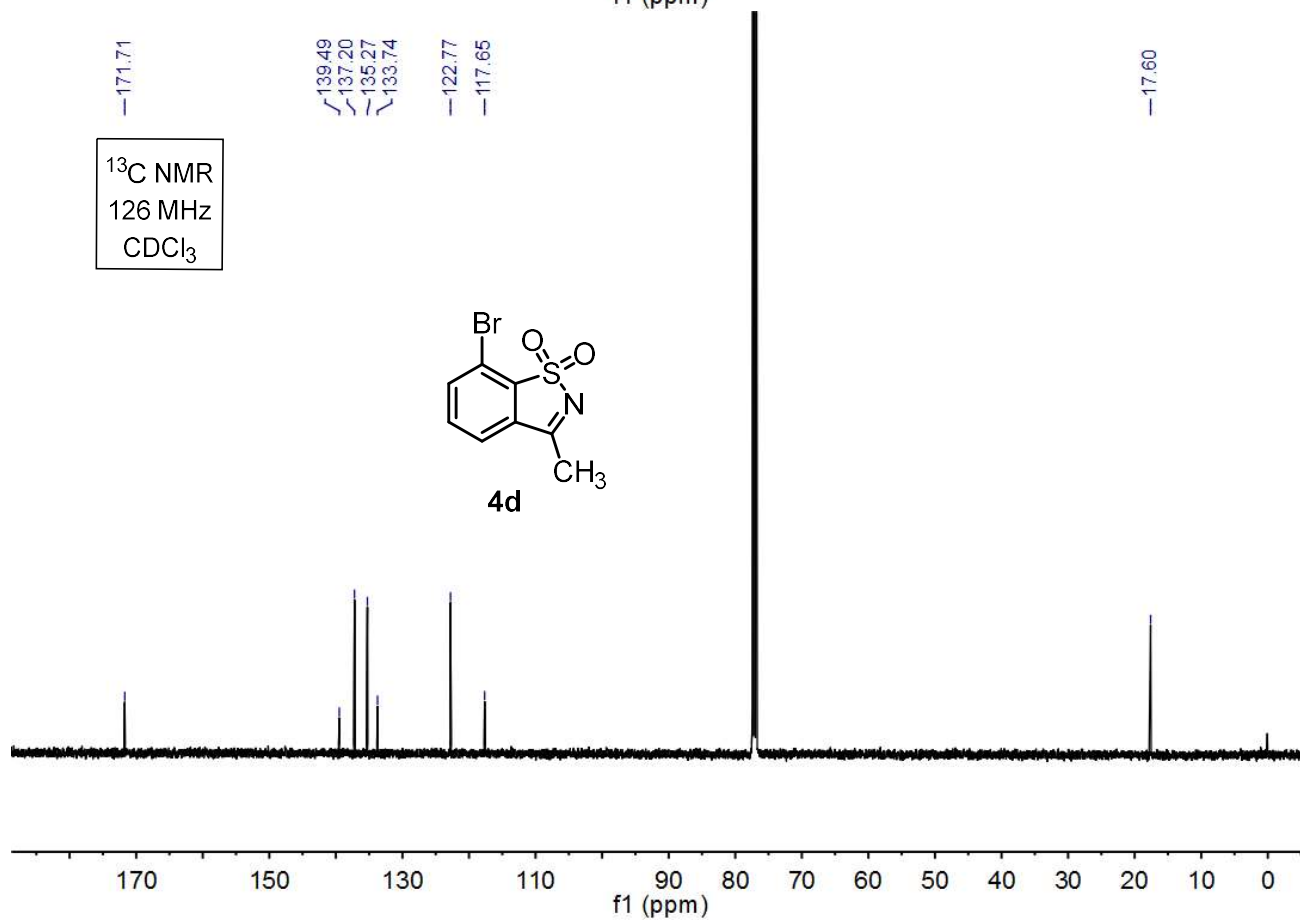



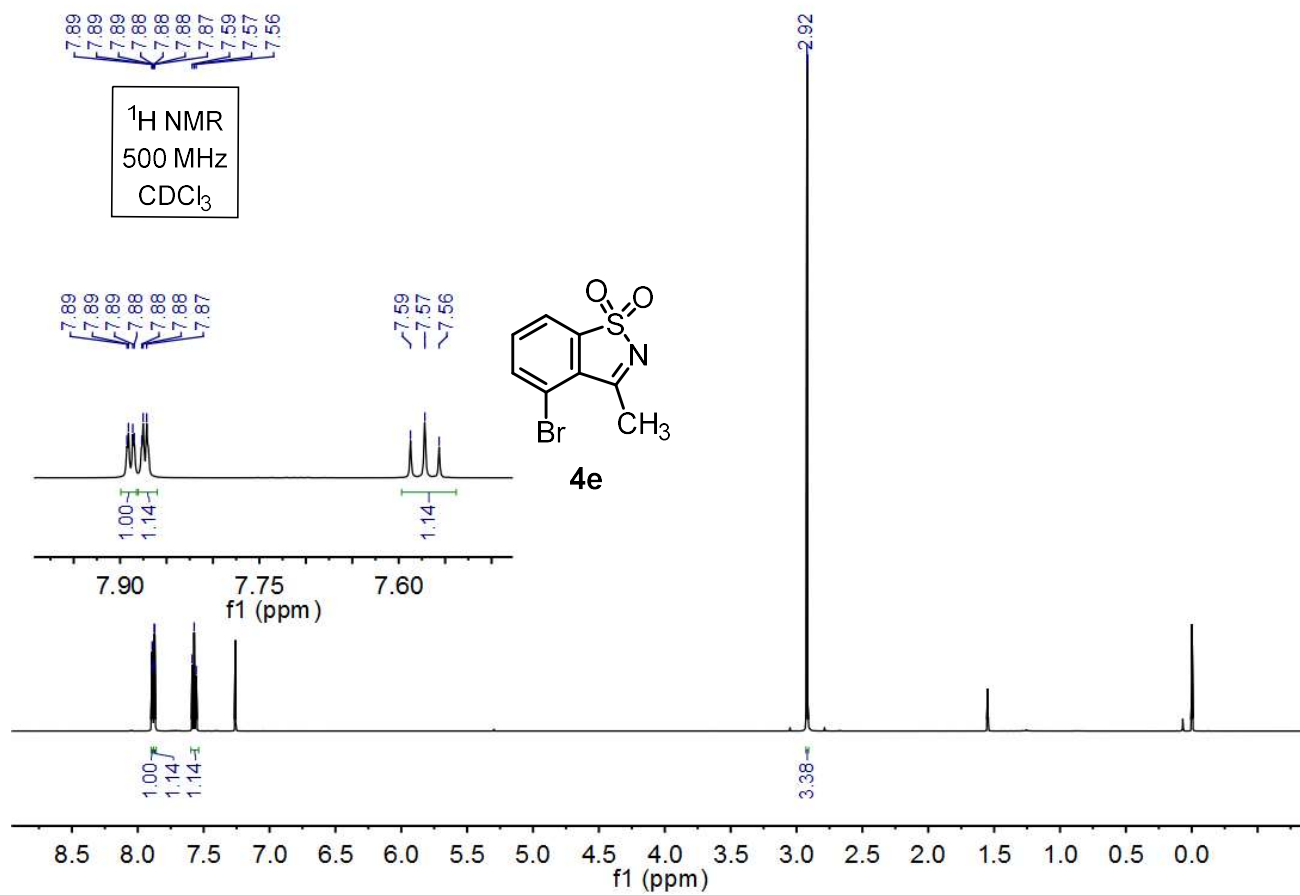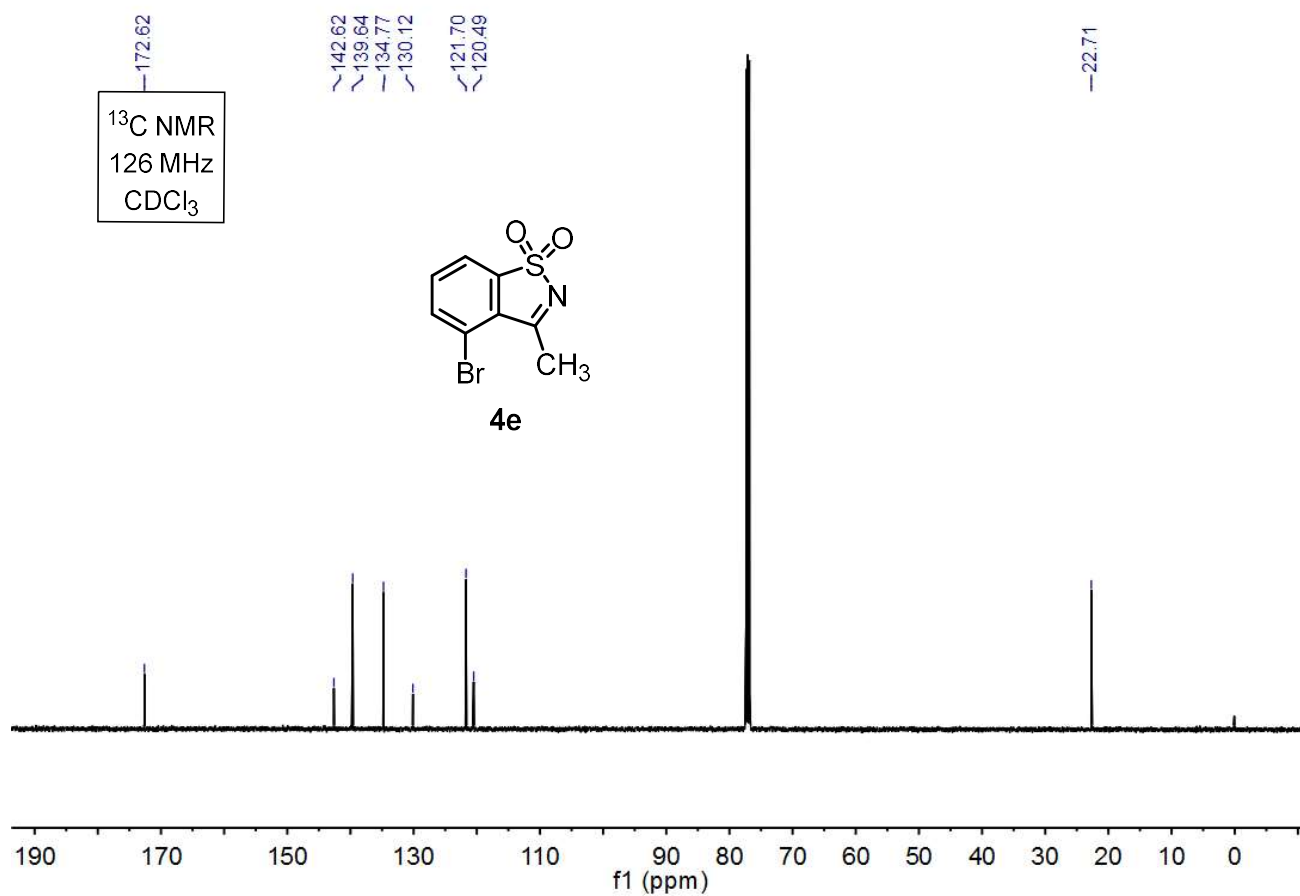

<sup>1</sup>H NMR  
500 MHz  
CDCl<sub>3</sub>

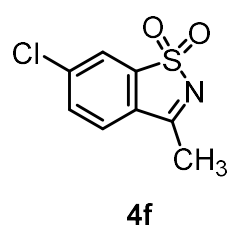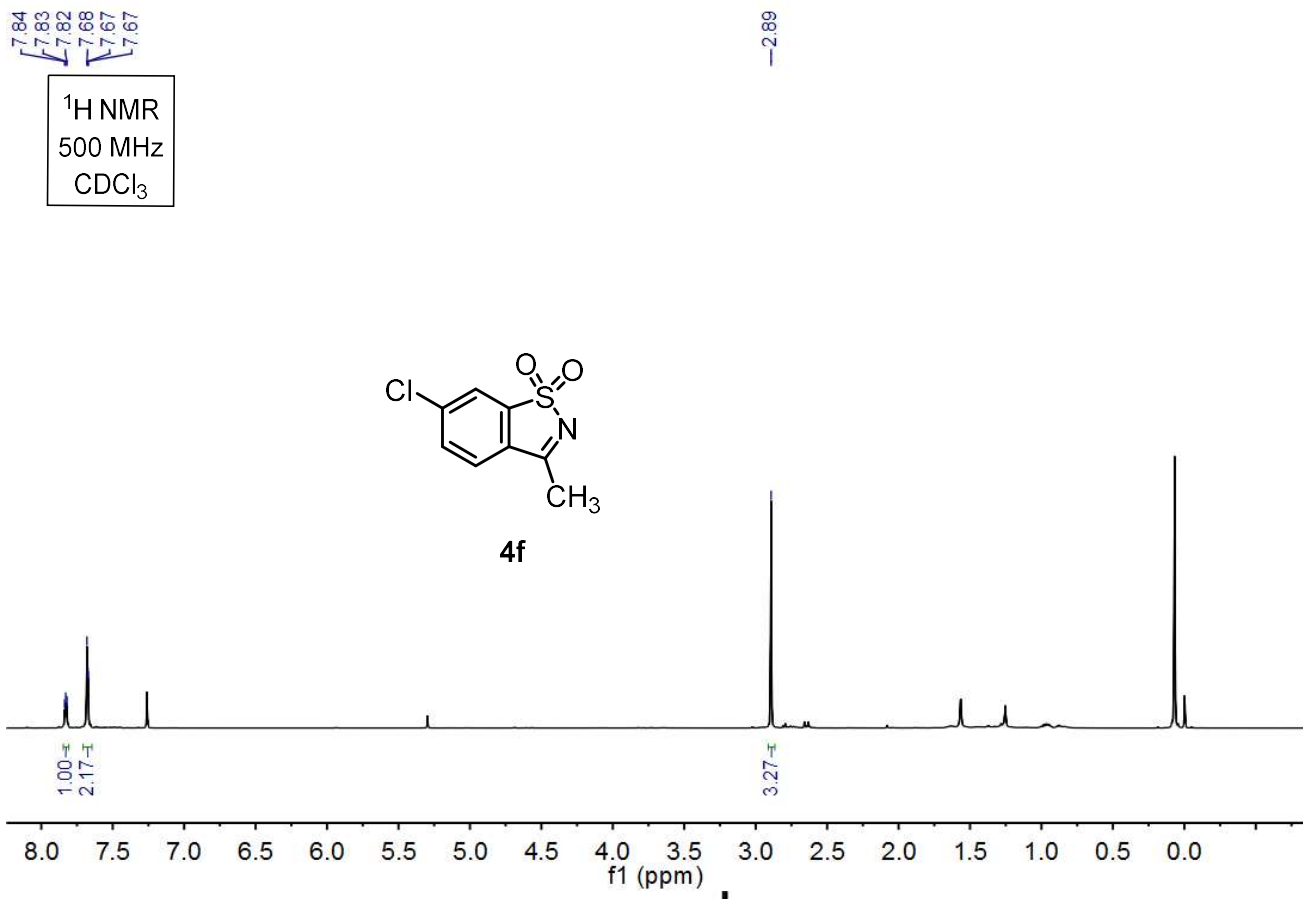

<sup>13</sup>C NMR  
126 MHz  
CDCl<sub>3</sub>

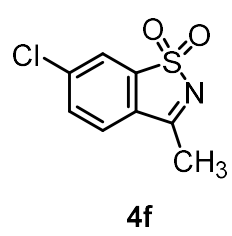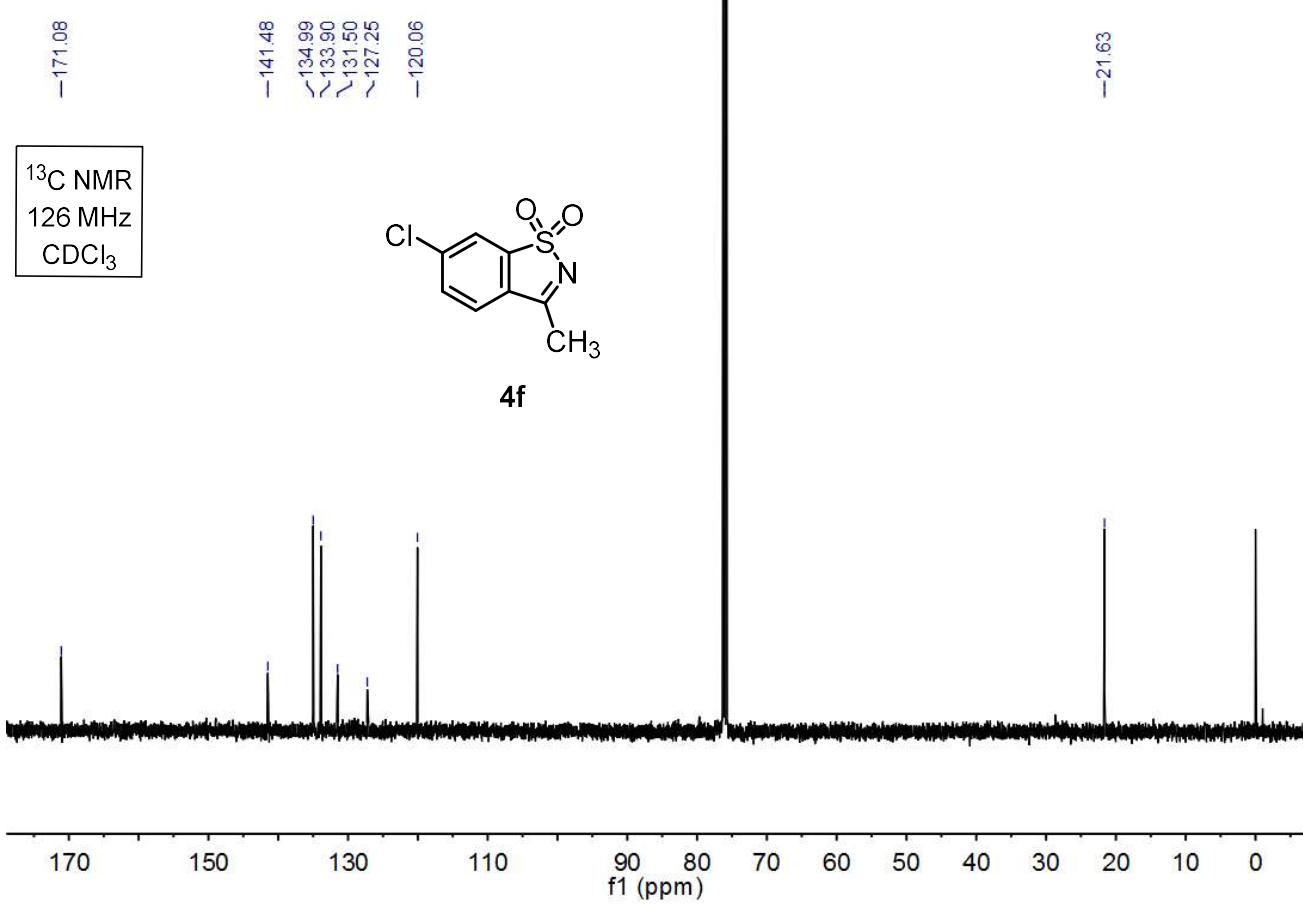

8.25  
8.24  
8.09  
8.09  
8.08  
8.08  
7.40  
7.38

<sup>1</sup>H NMR  
500 MHz  
CDCl<sub>3</sub>

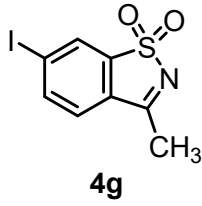

-2.64

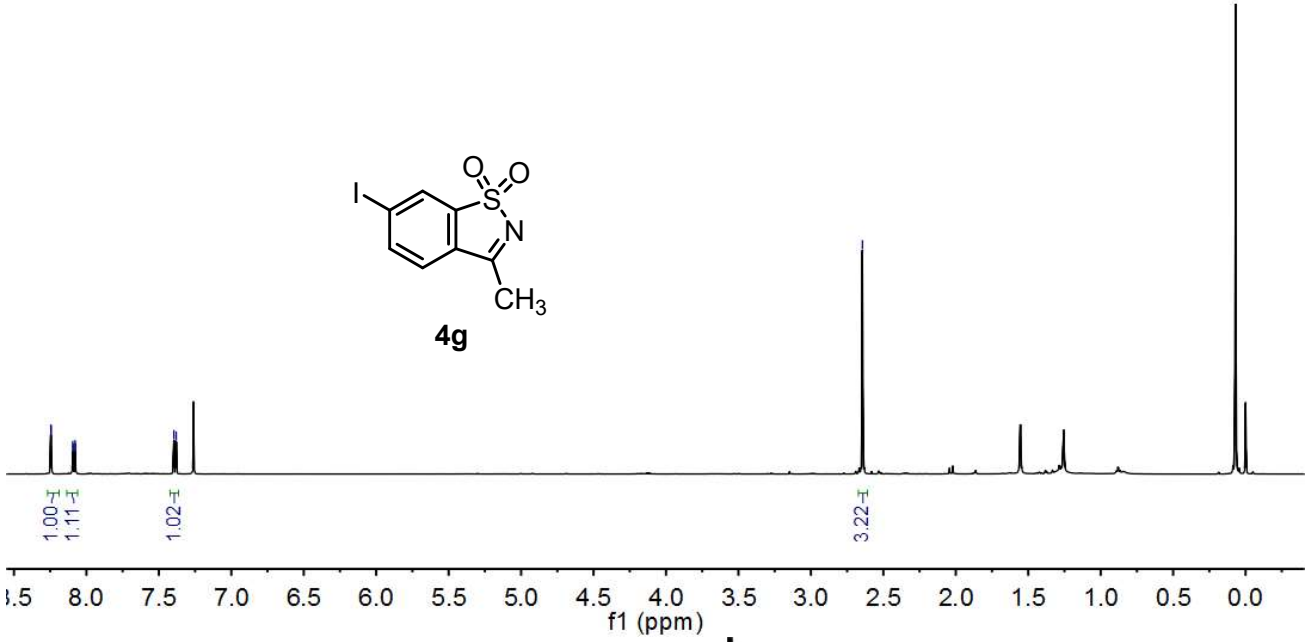

<sup>13</sup>C NMR  
126 MHz  
CDCl<sub>3</sub>

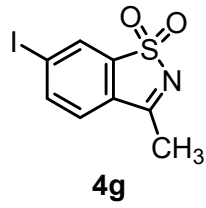

-172.73  
-143.11  
-141.18  
-131.63  
-131.03  
-125.11  
-101.35  
-17.57

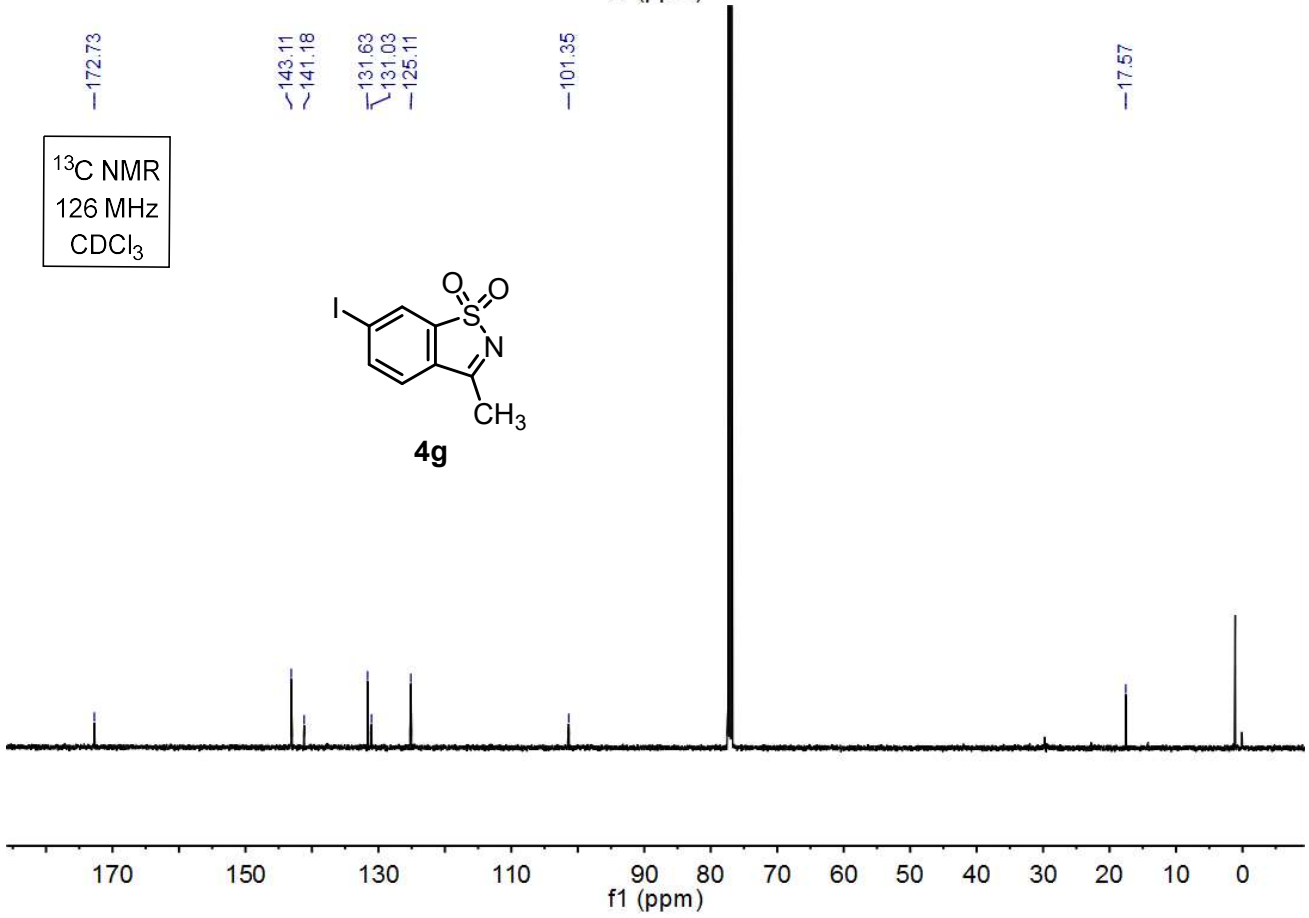

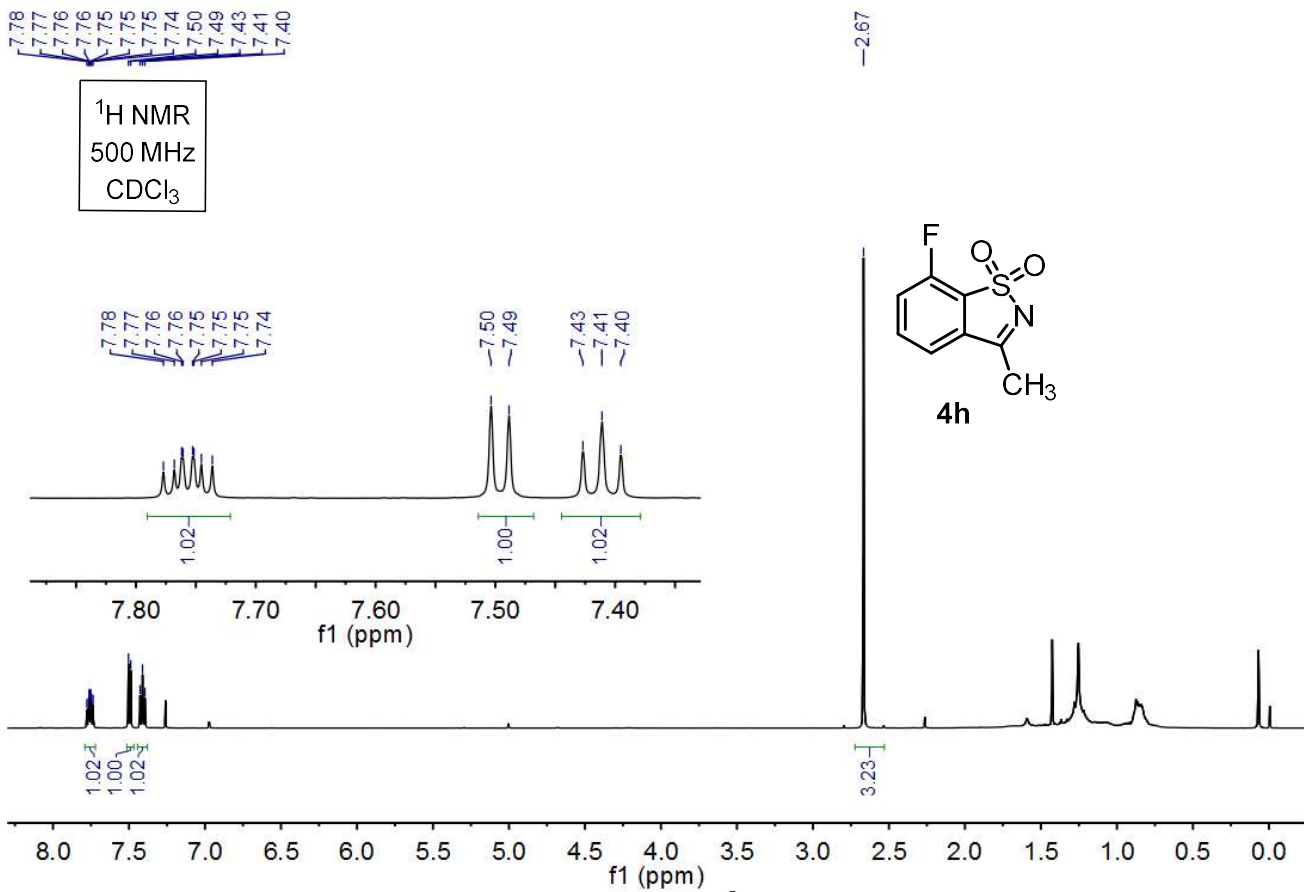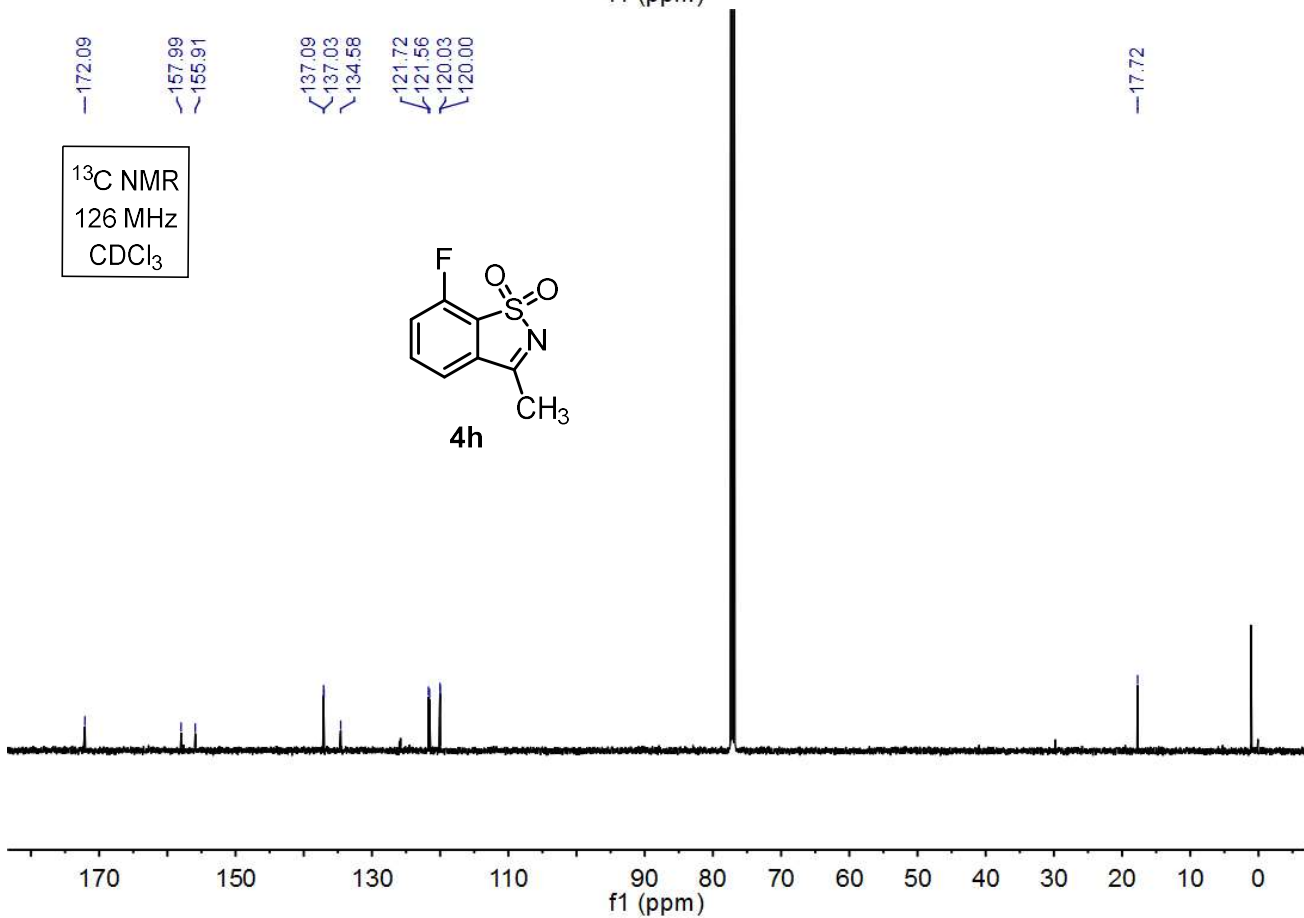

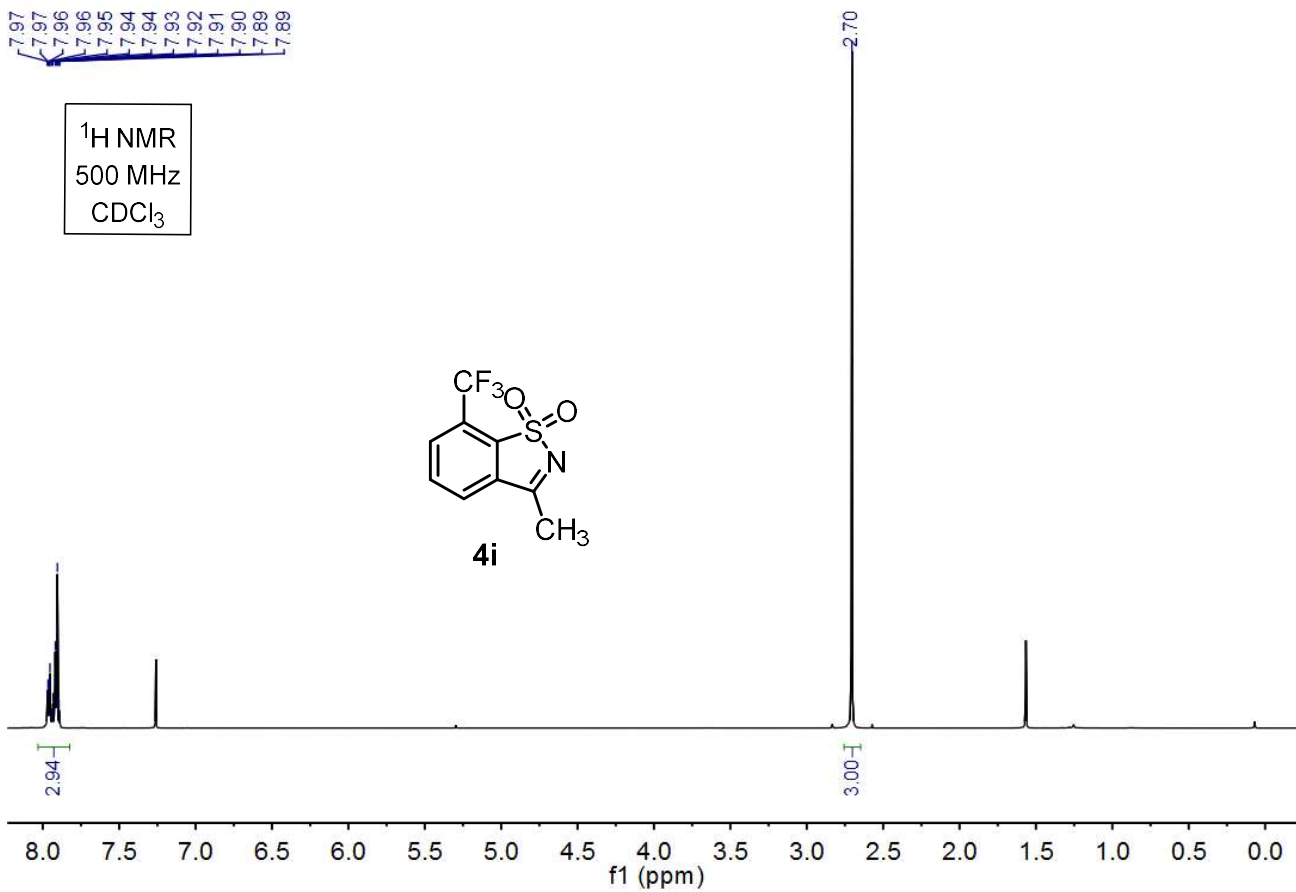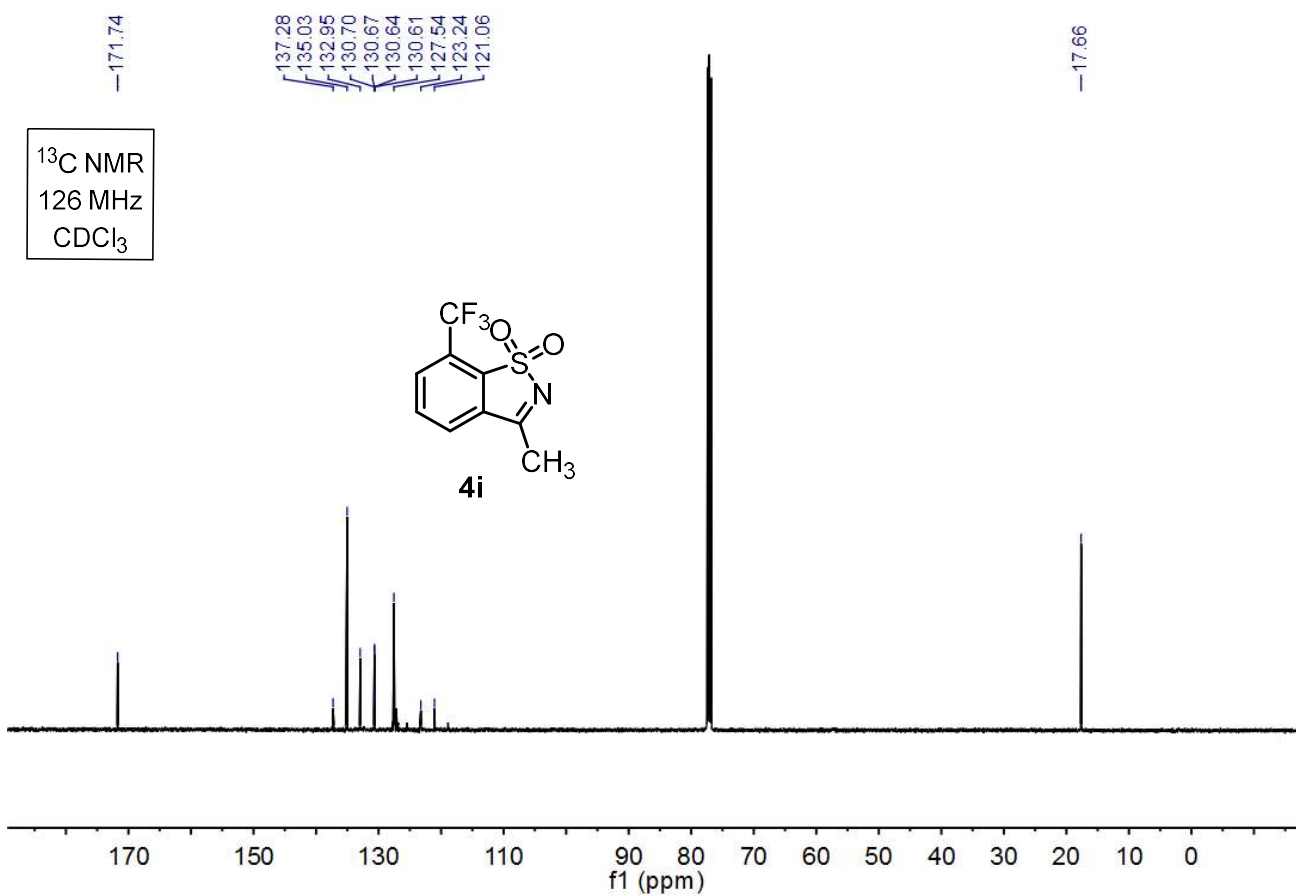

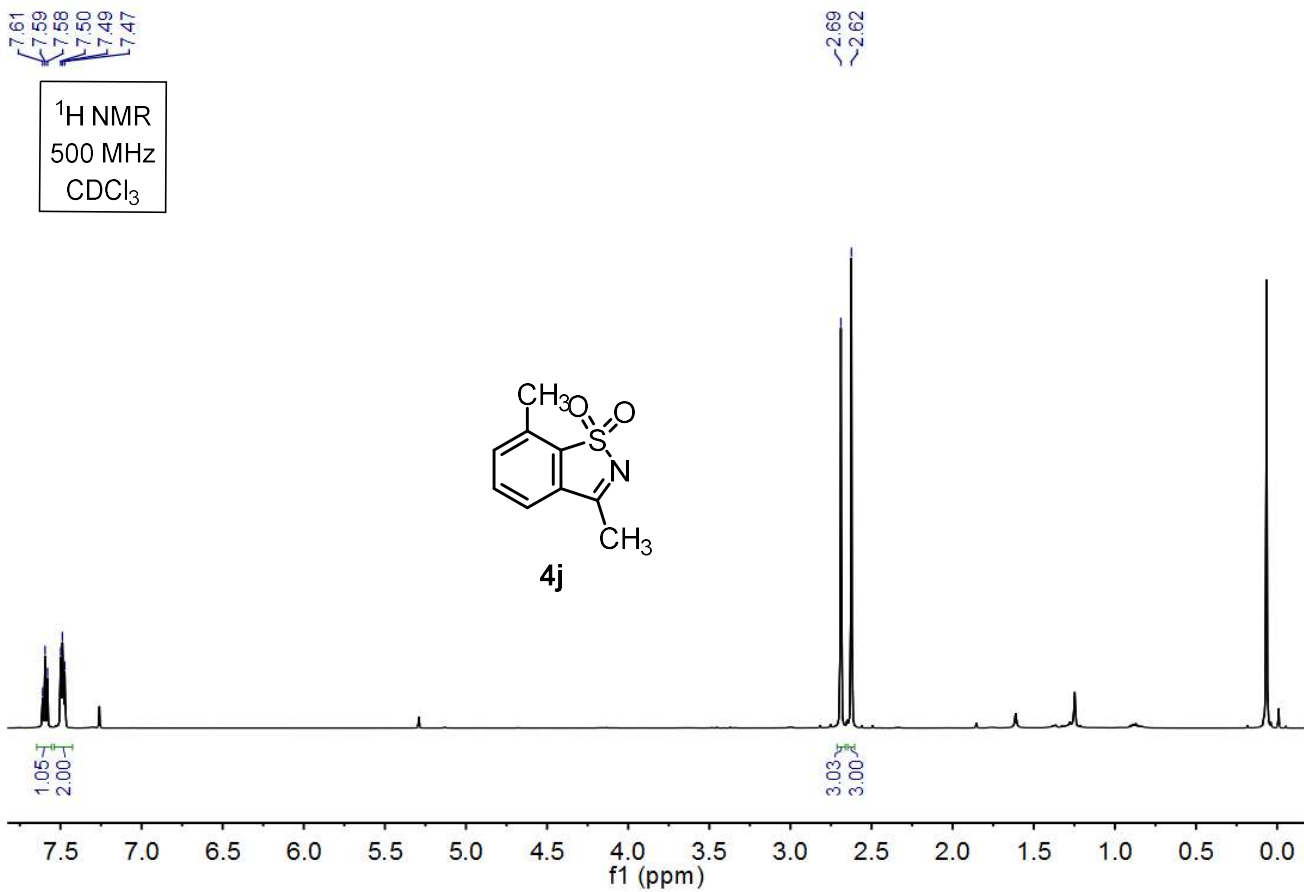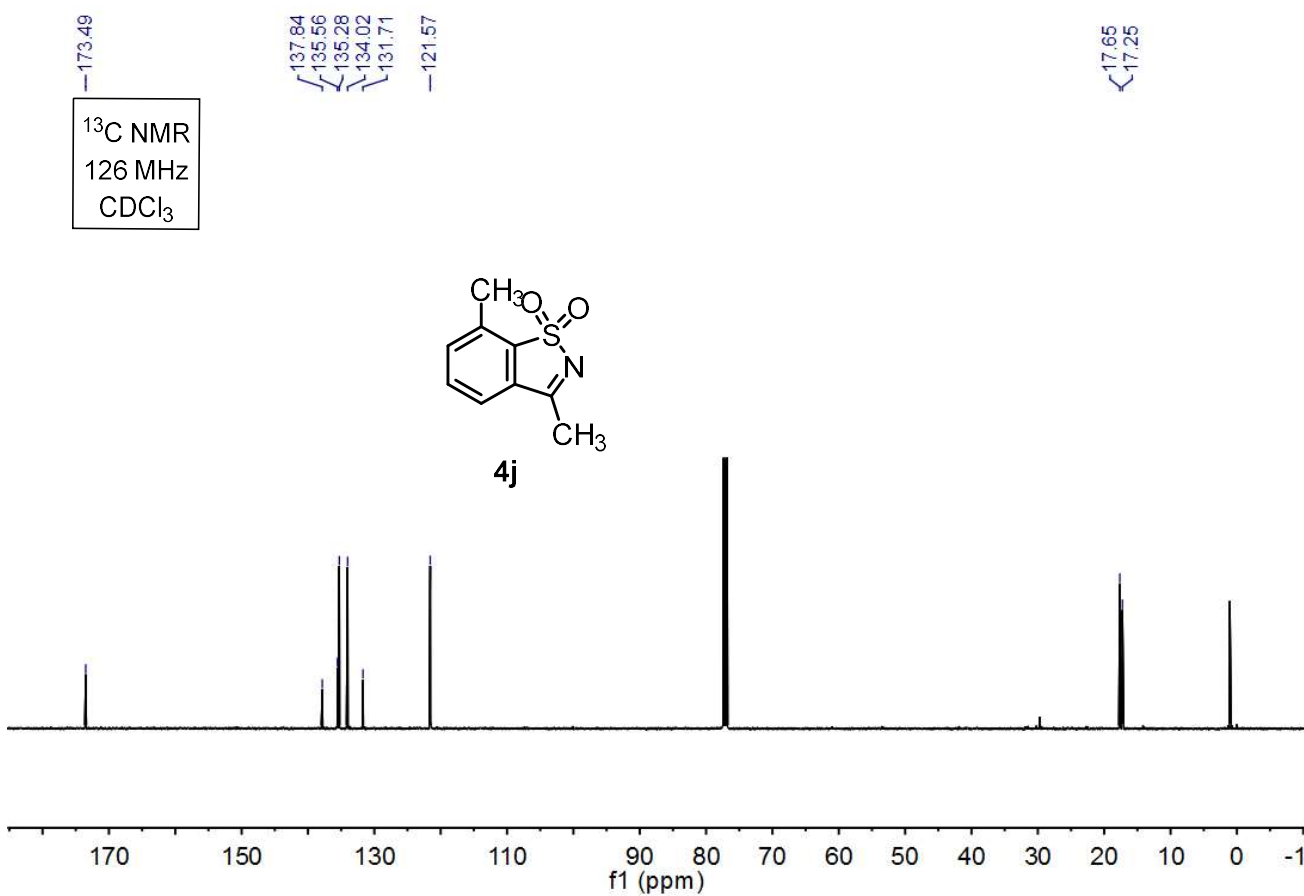

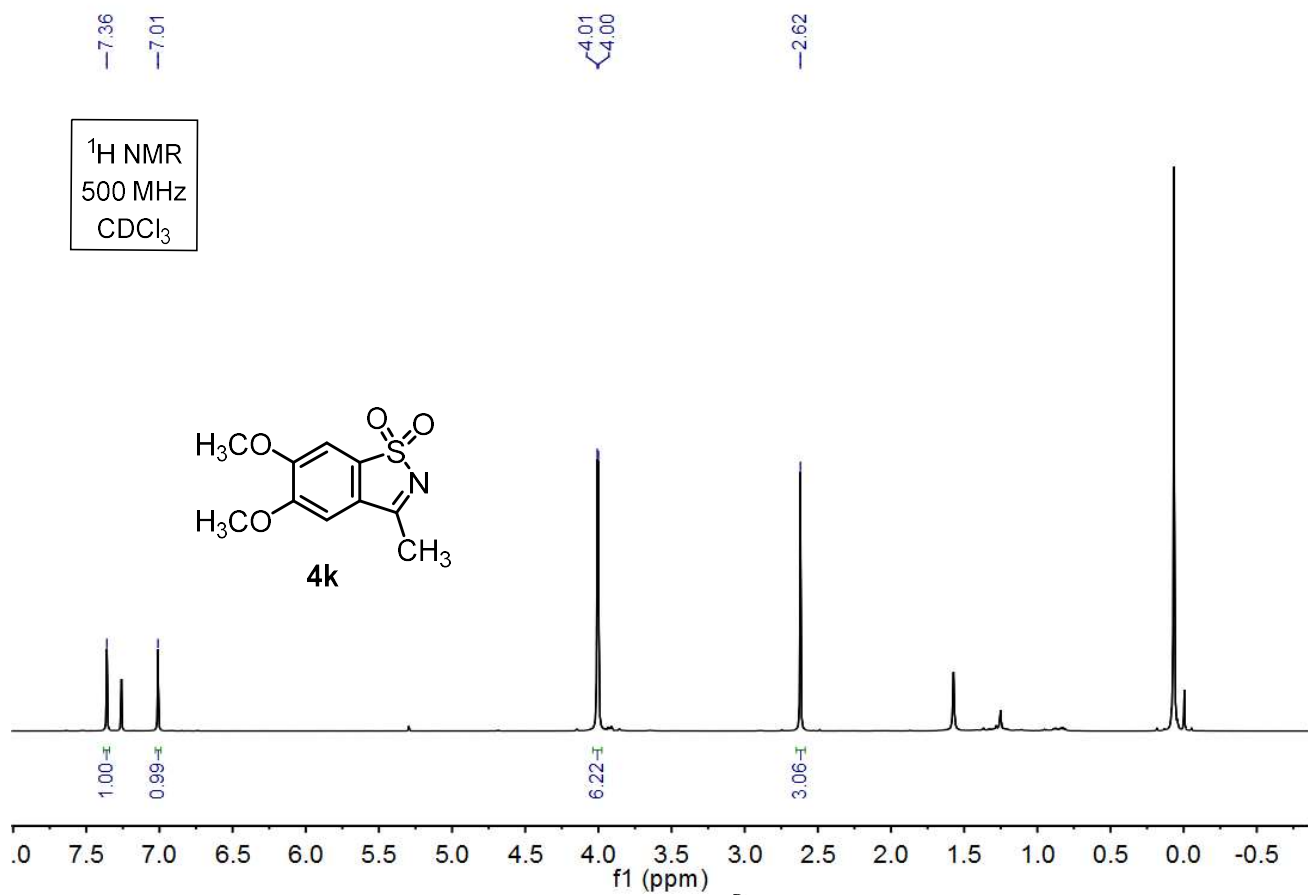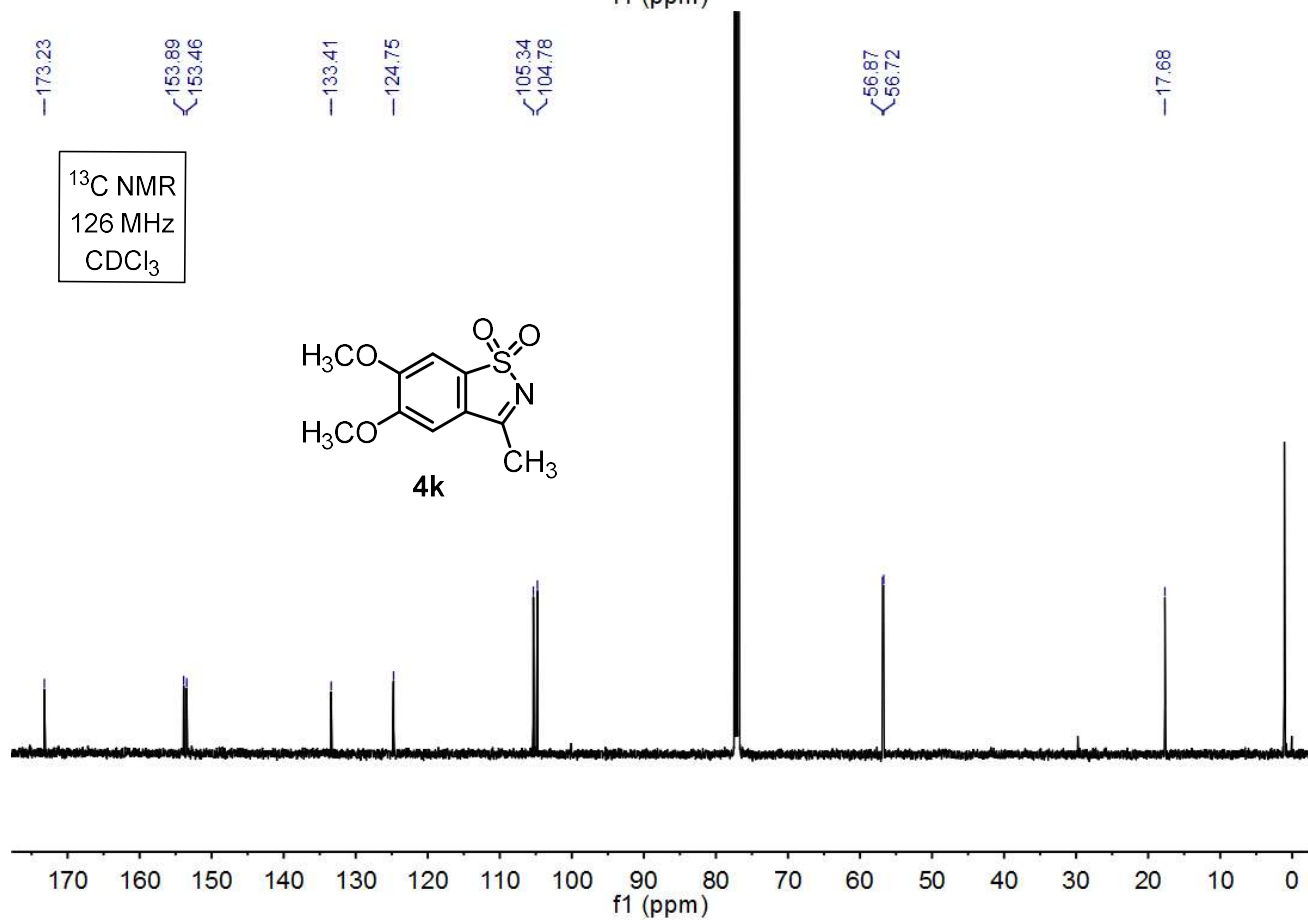

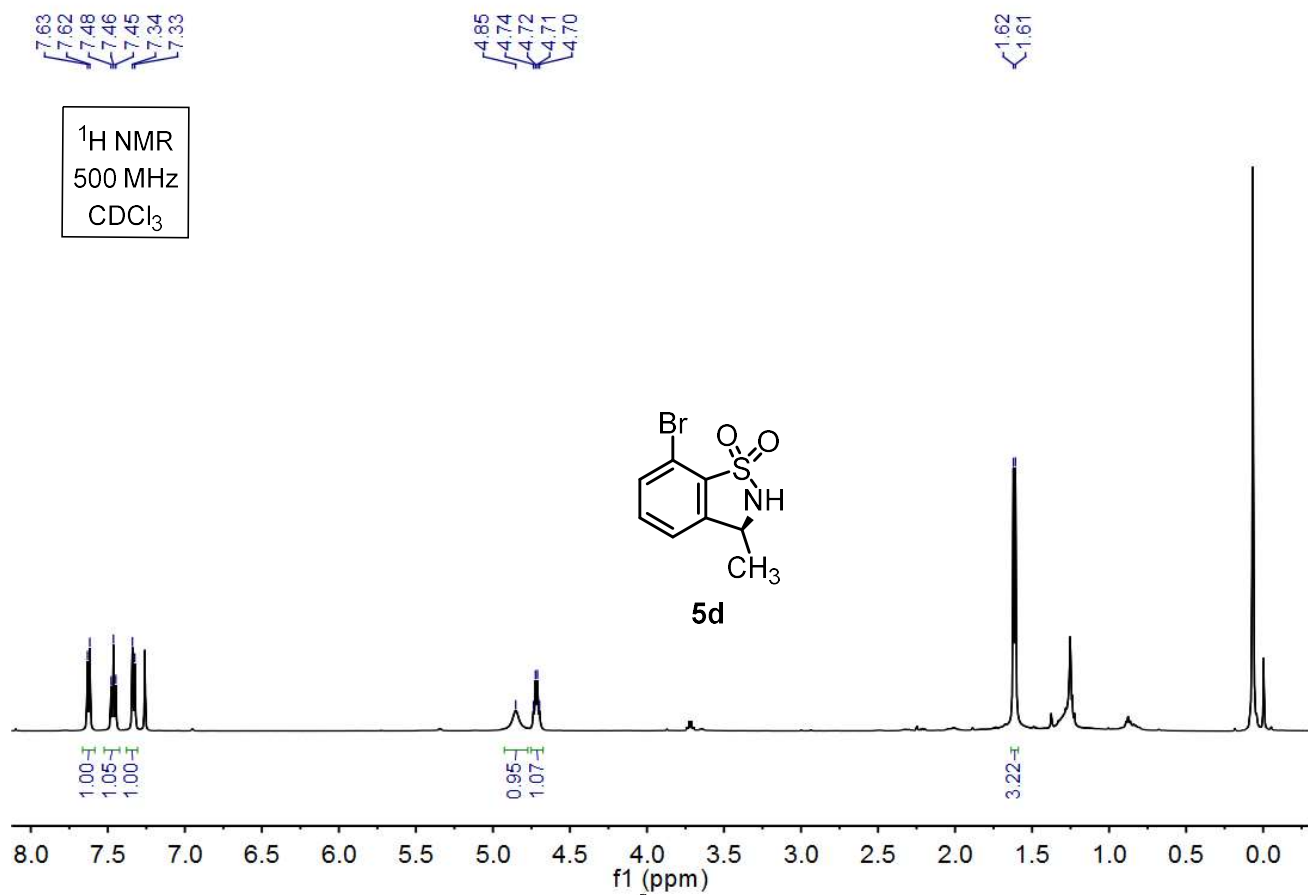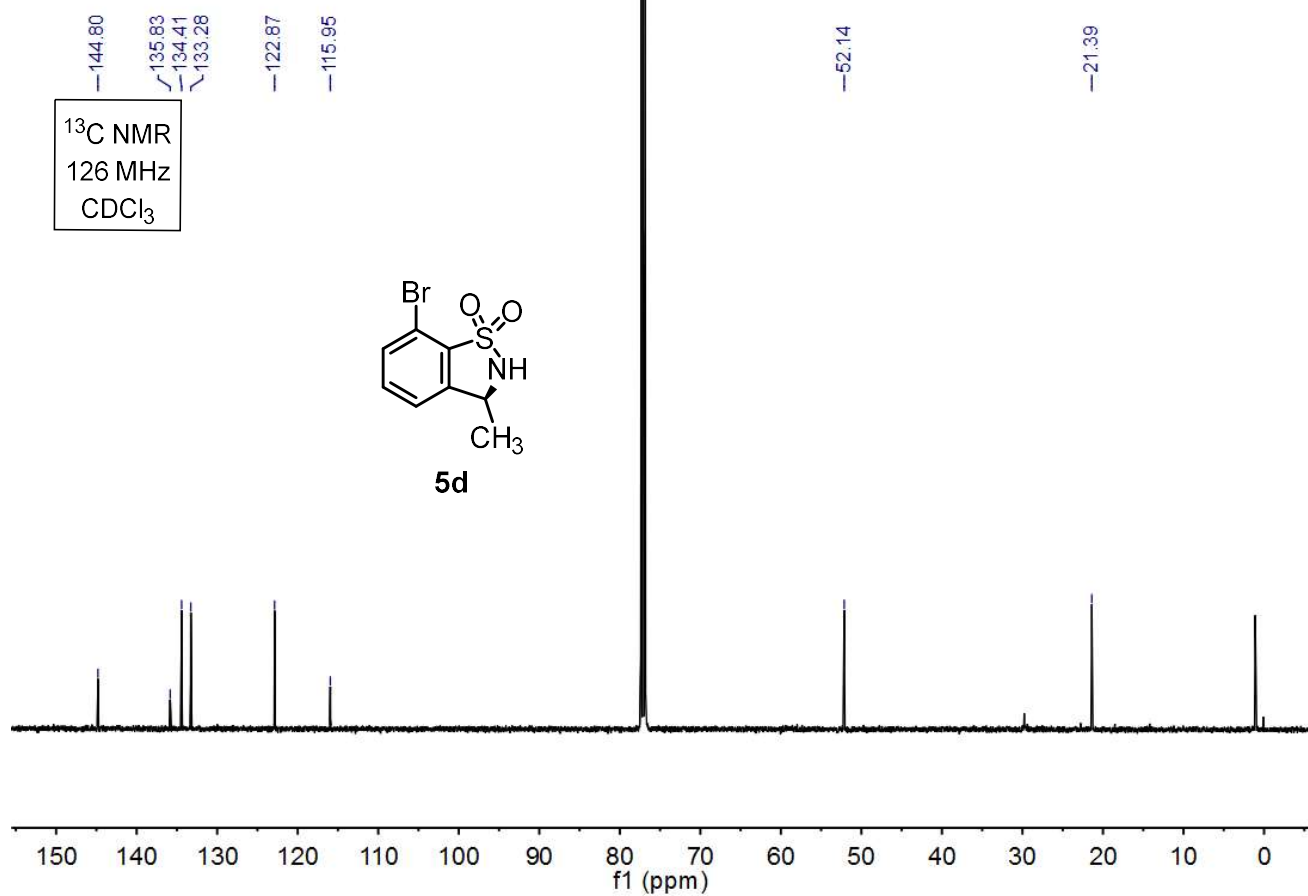



$^1\text{H NMR}$   
500 MHz  
 $\text{CDCl}_3$

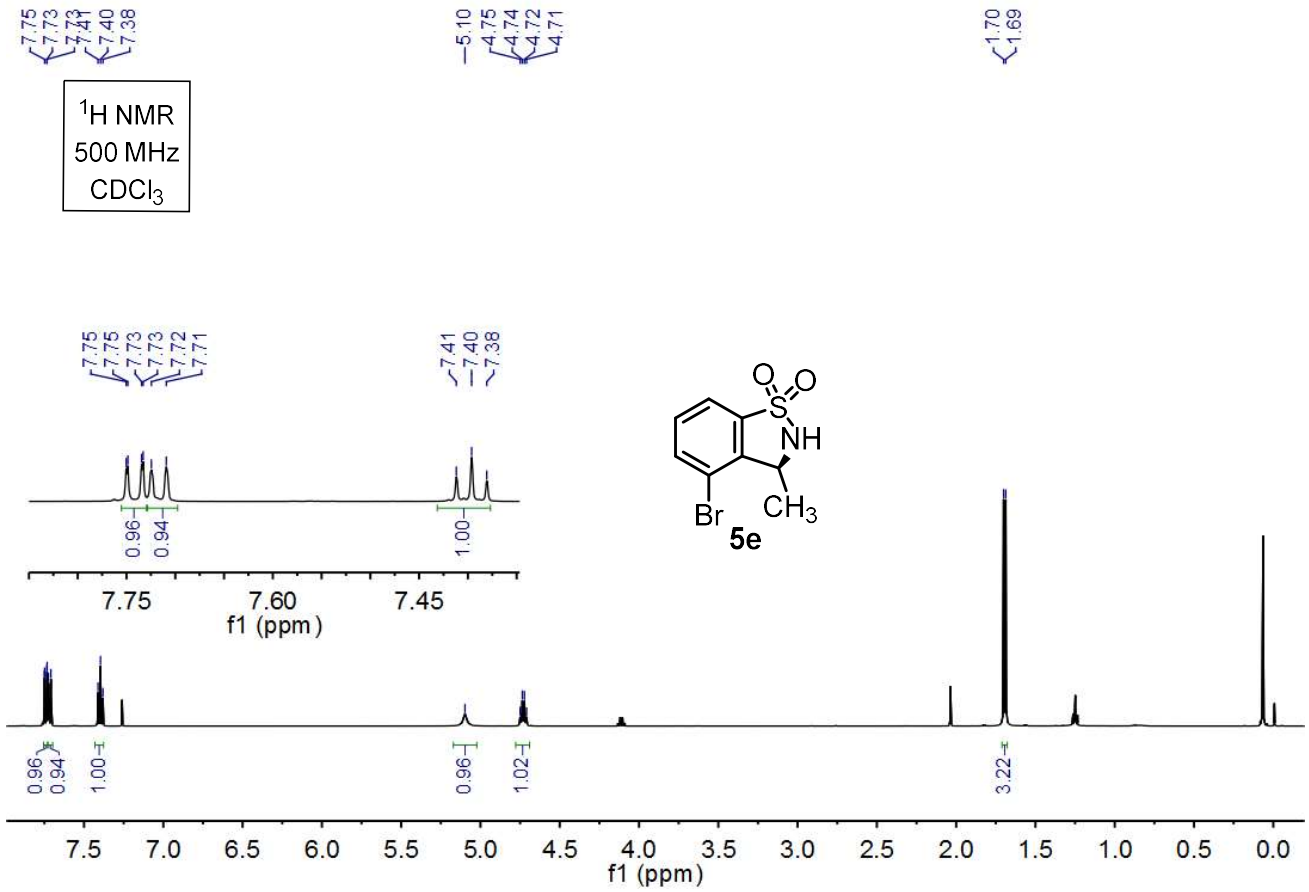

$^{13}\text{C NMR}$   
126 MHz  
 $\text{CDCl}_3$

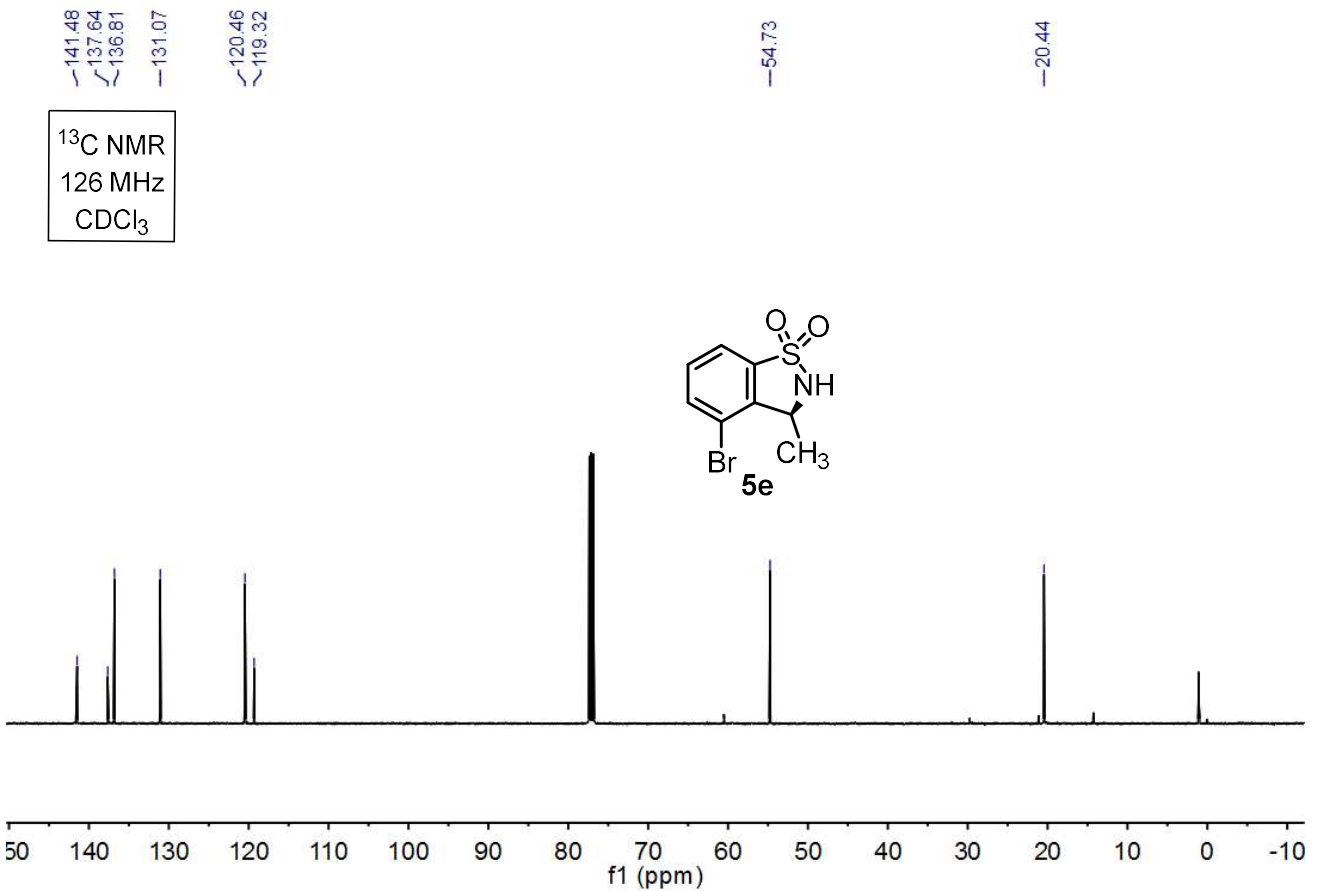

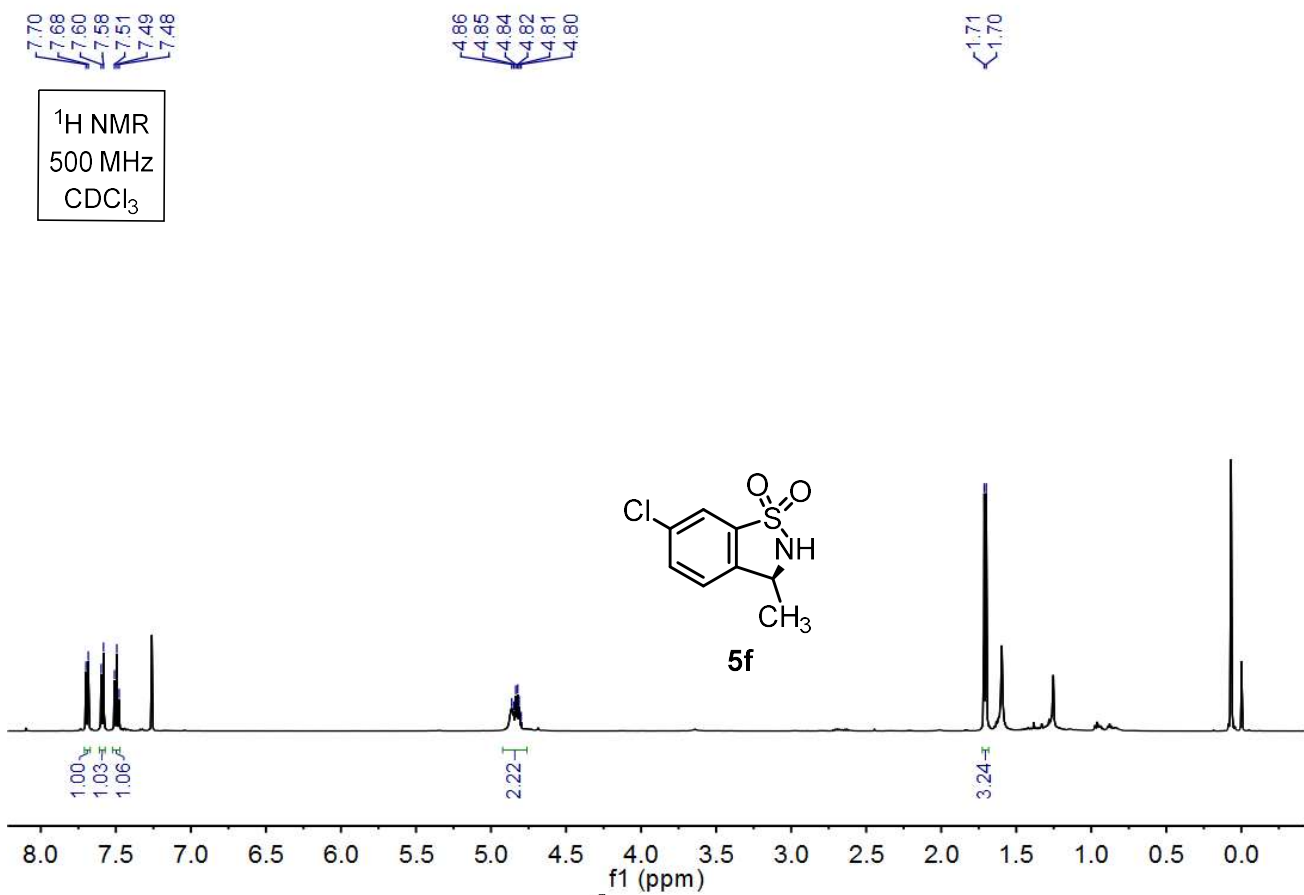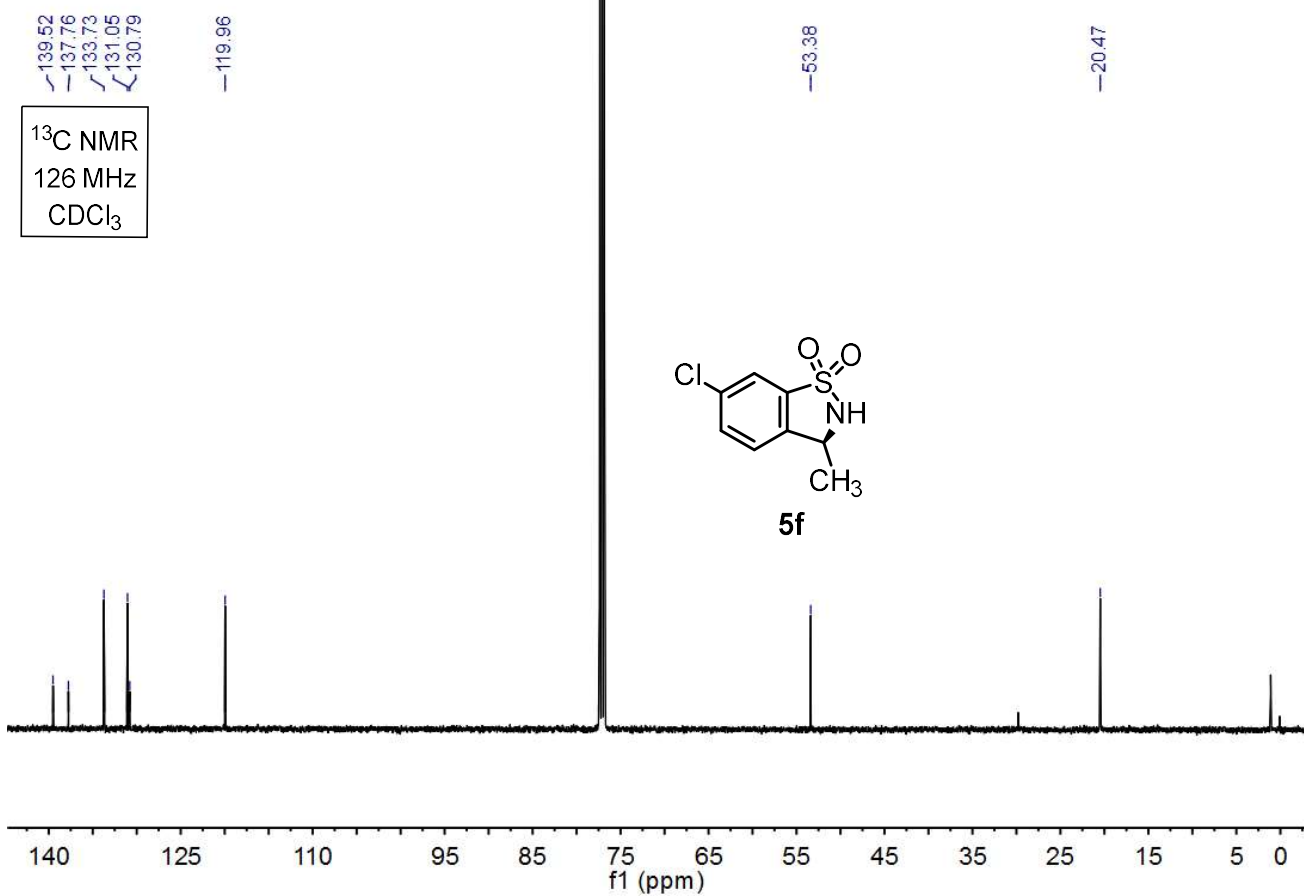

7.50  
7.49  
7.47  
7.26  
7.24  
7.18  
7.17

<sup>1</sup>H NMR  
500 MHz  
CDCl<sub>3</sub>

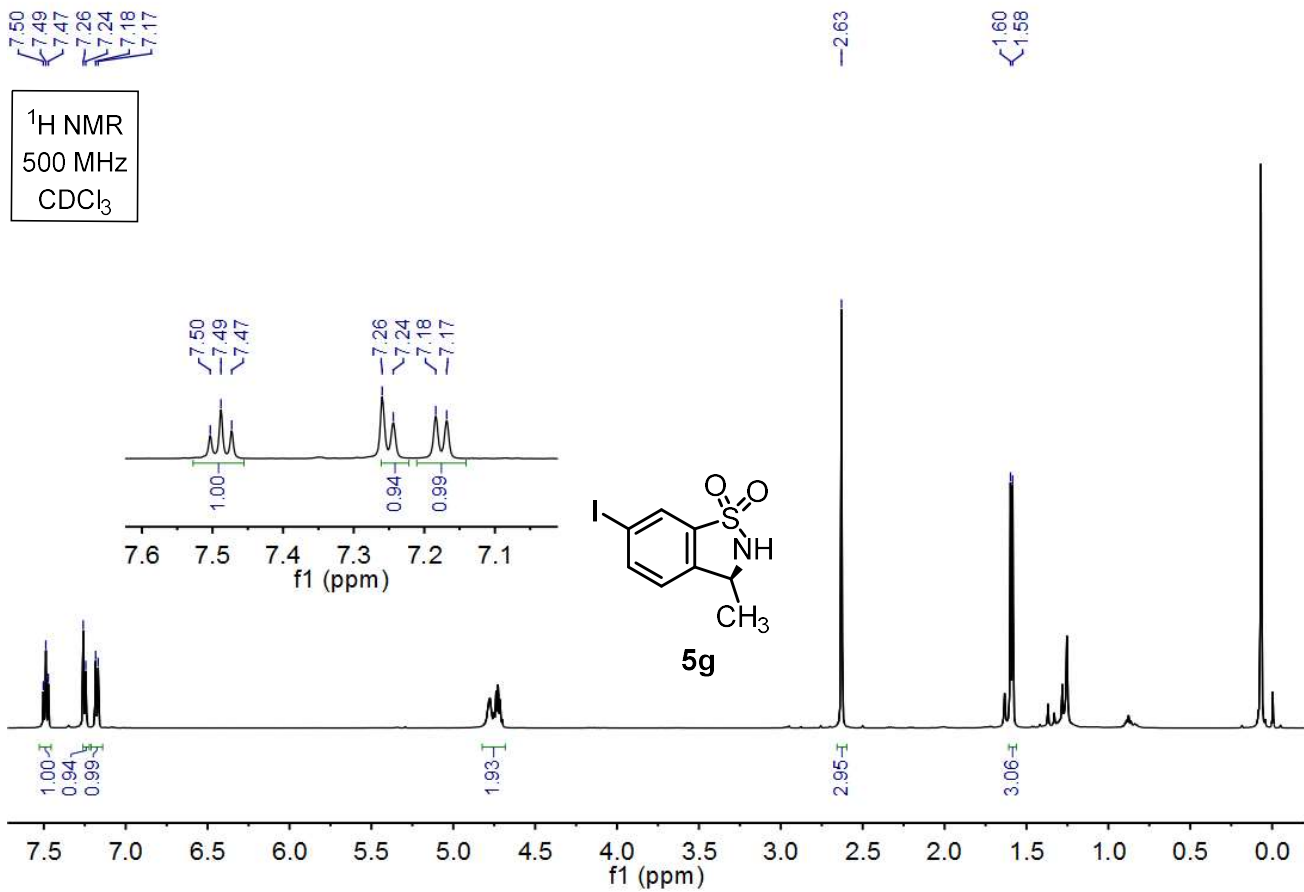

<sup>13</sup>C NMR  
126 MHz  
CDCl<sub>3</sub>

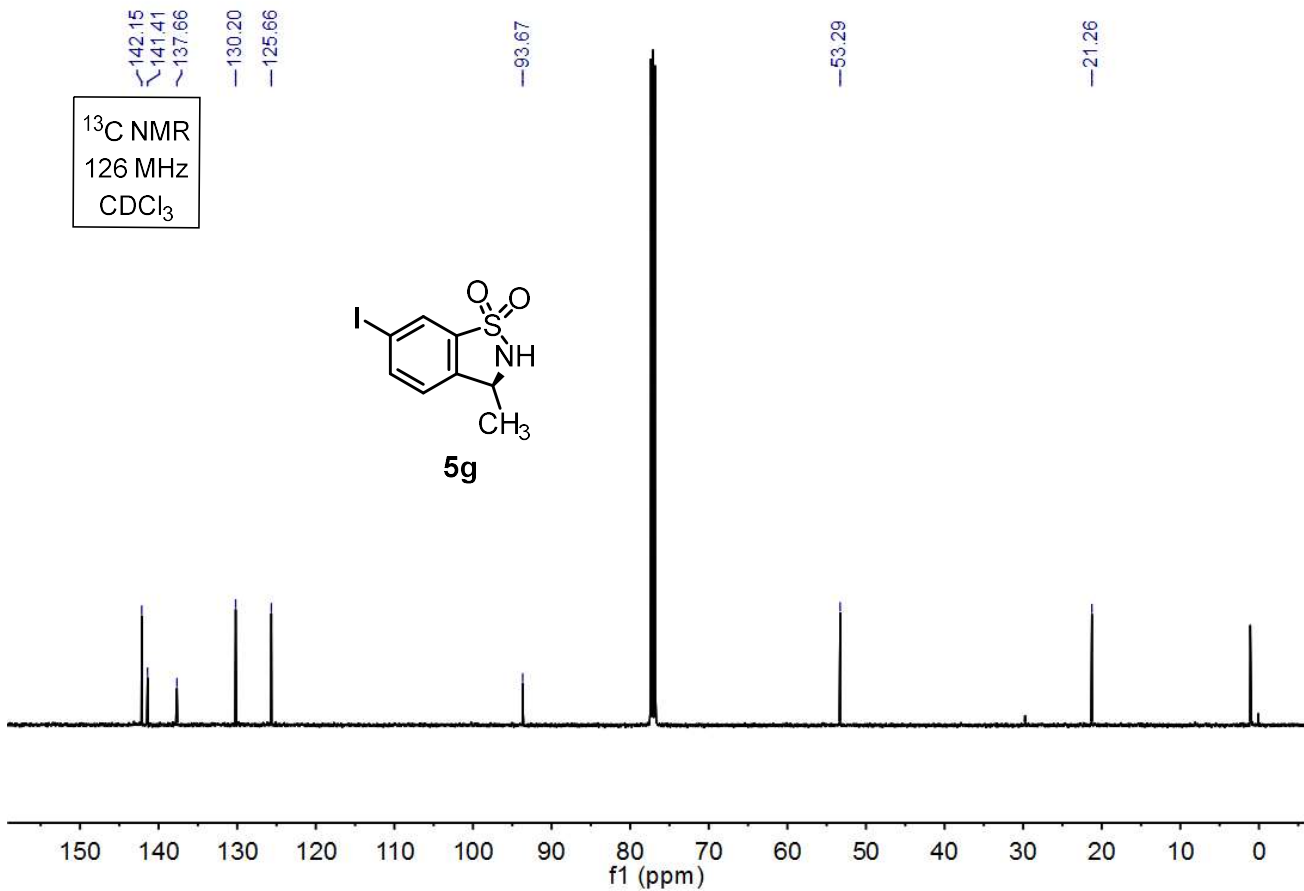

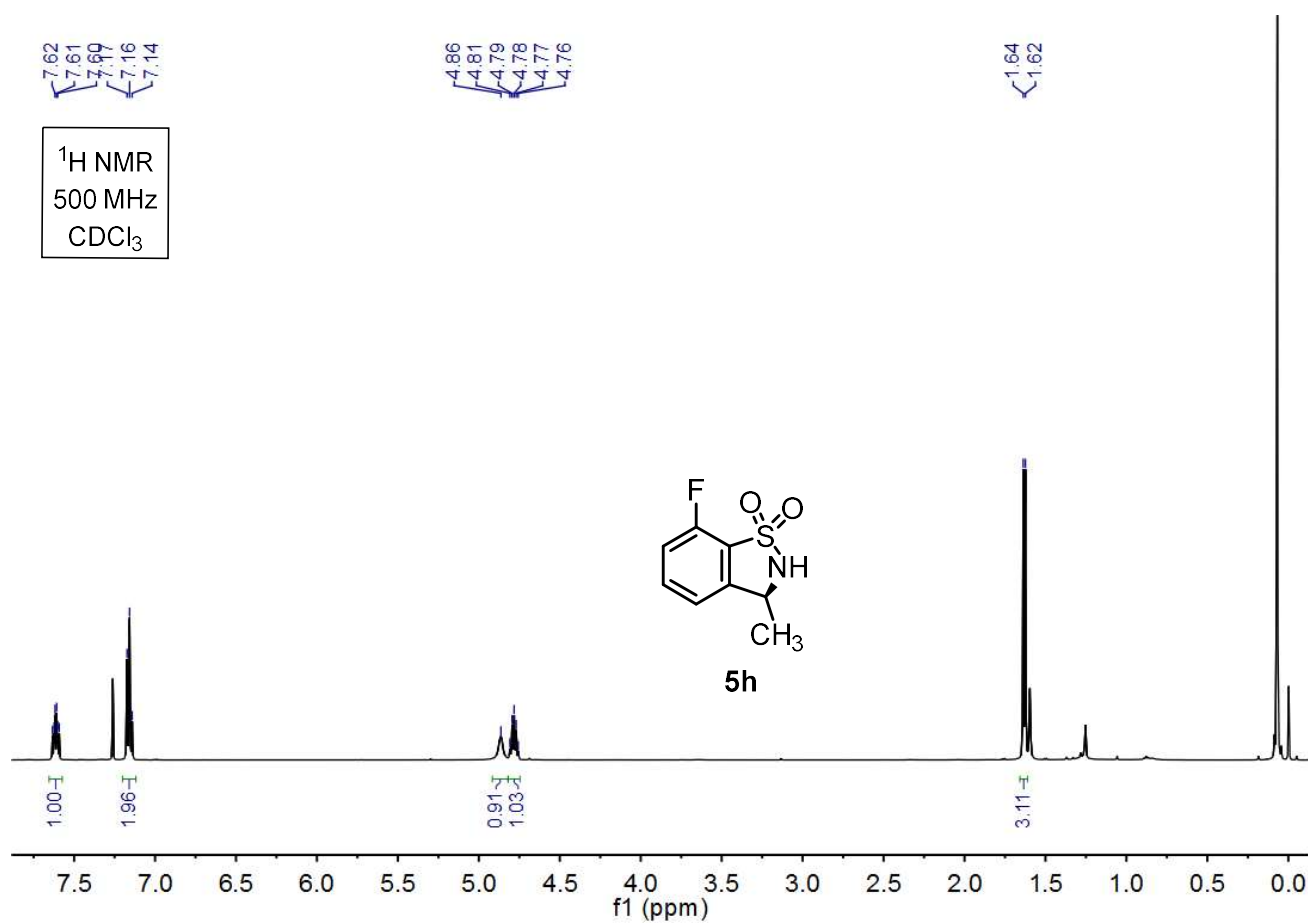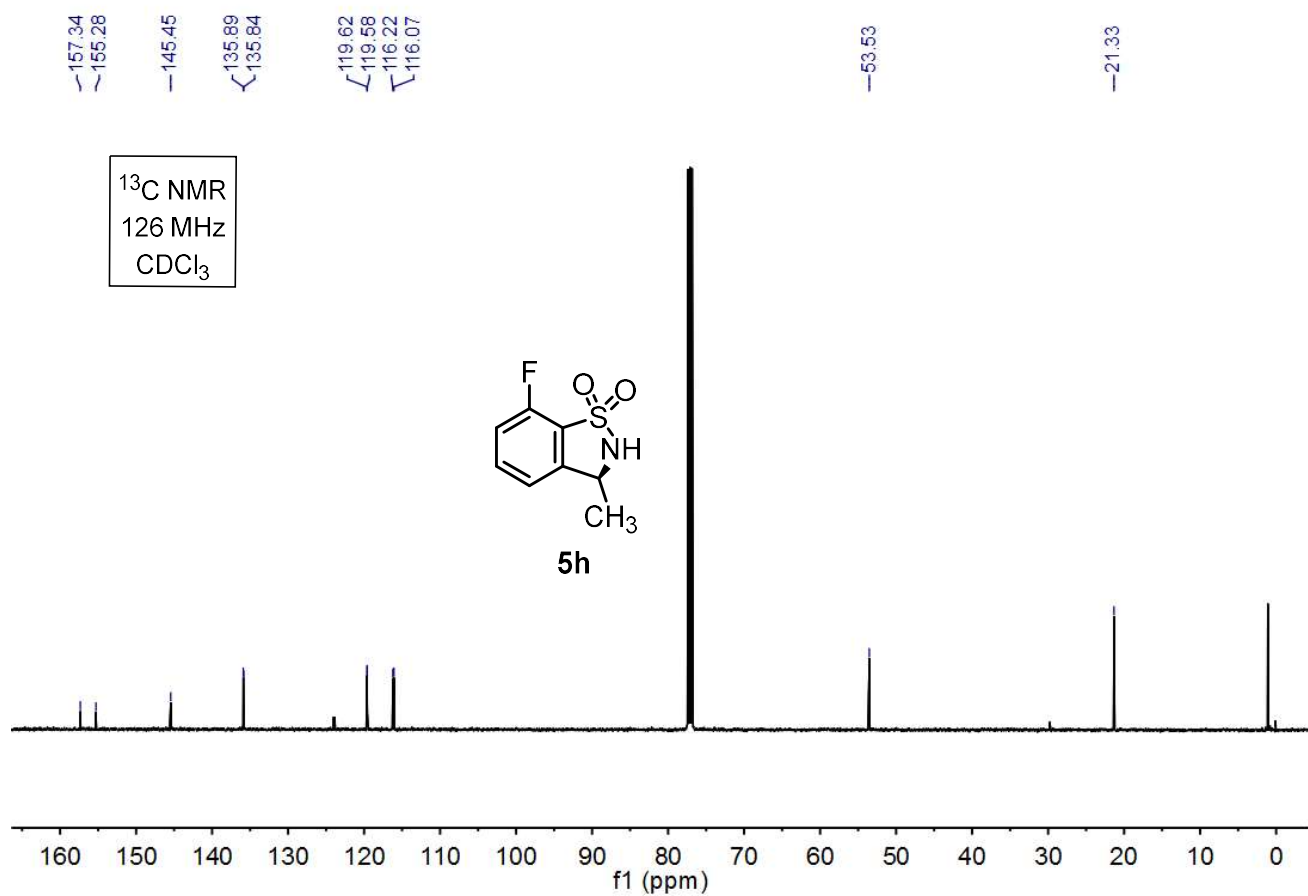

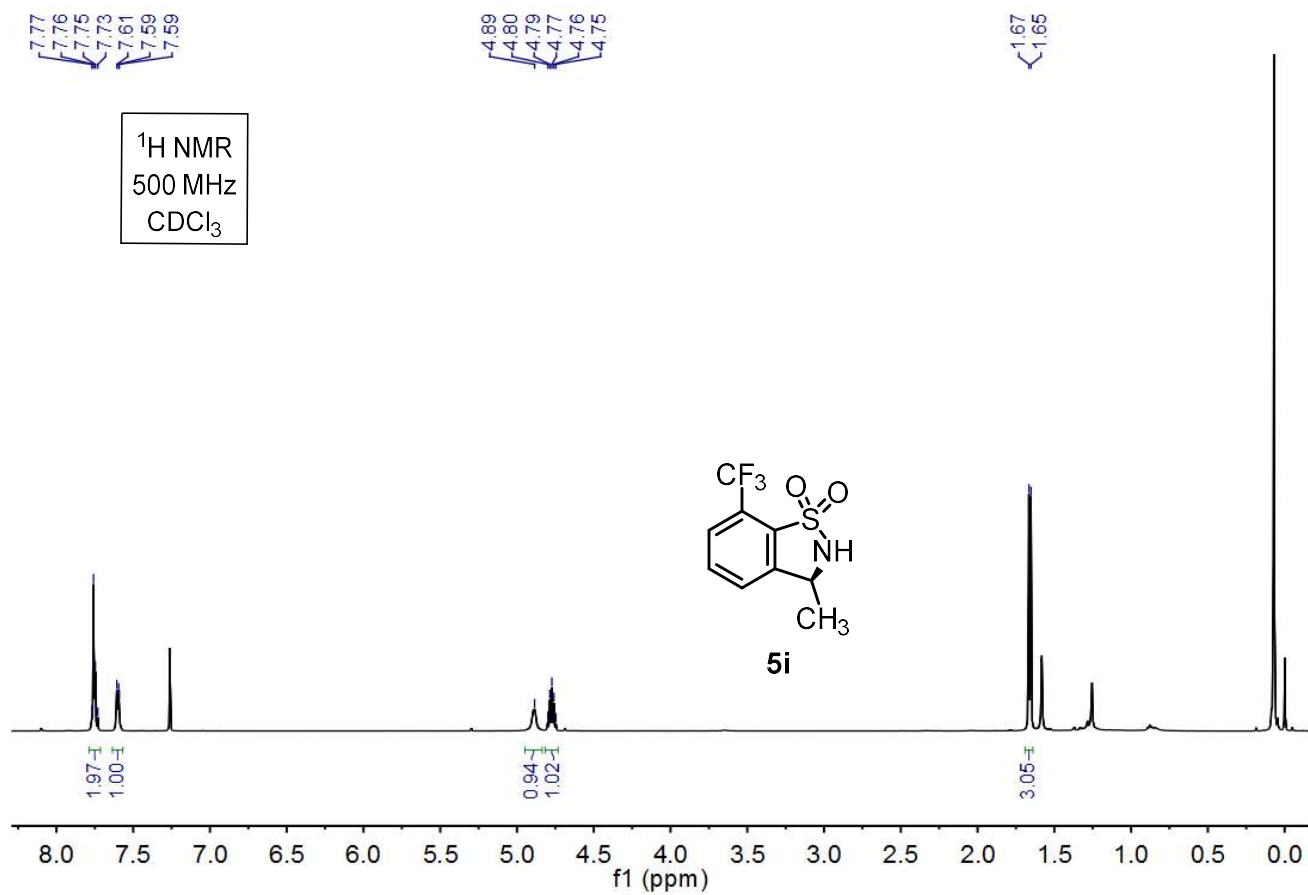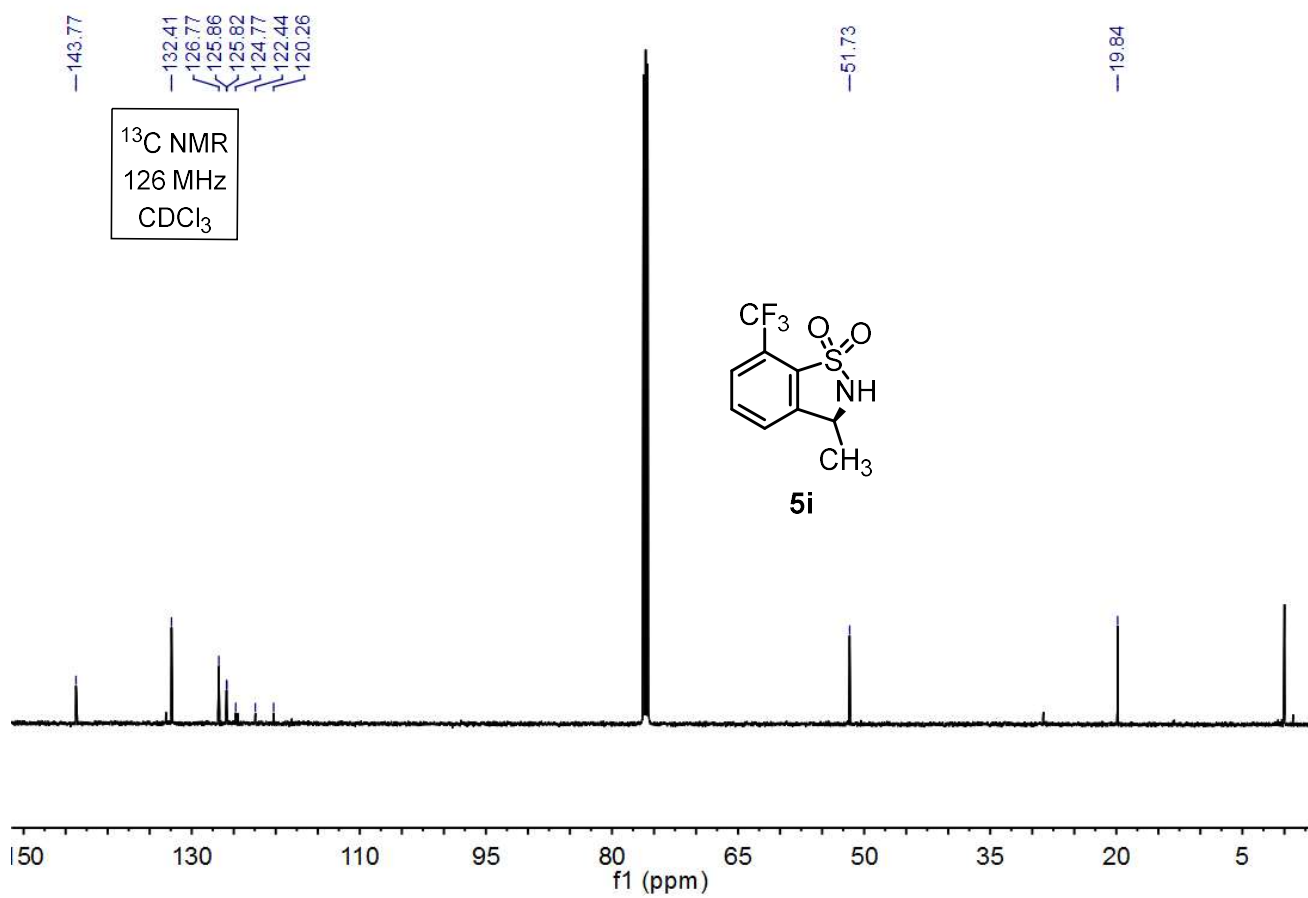

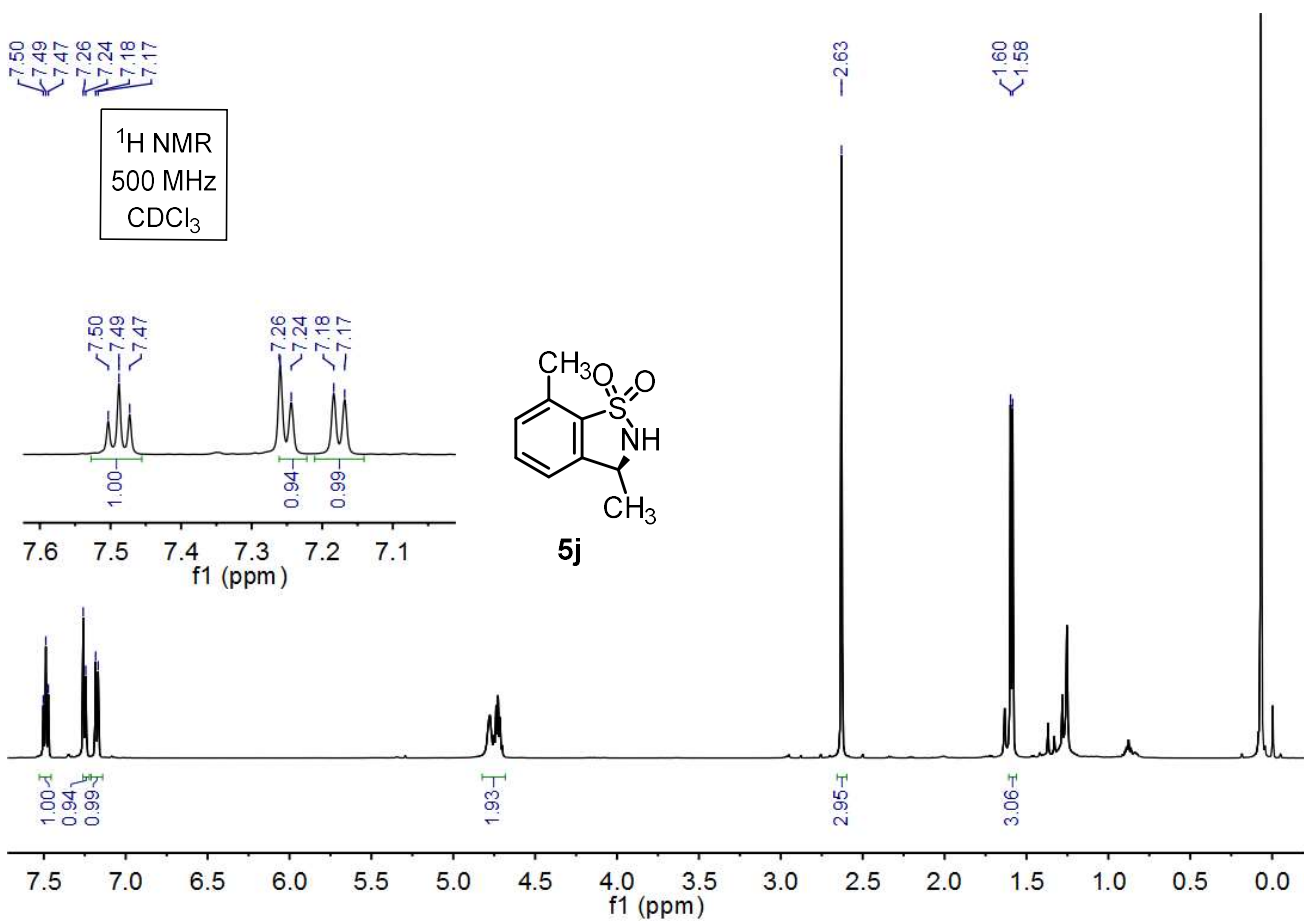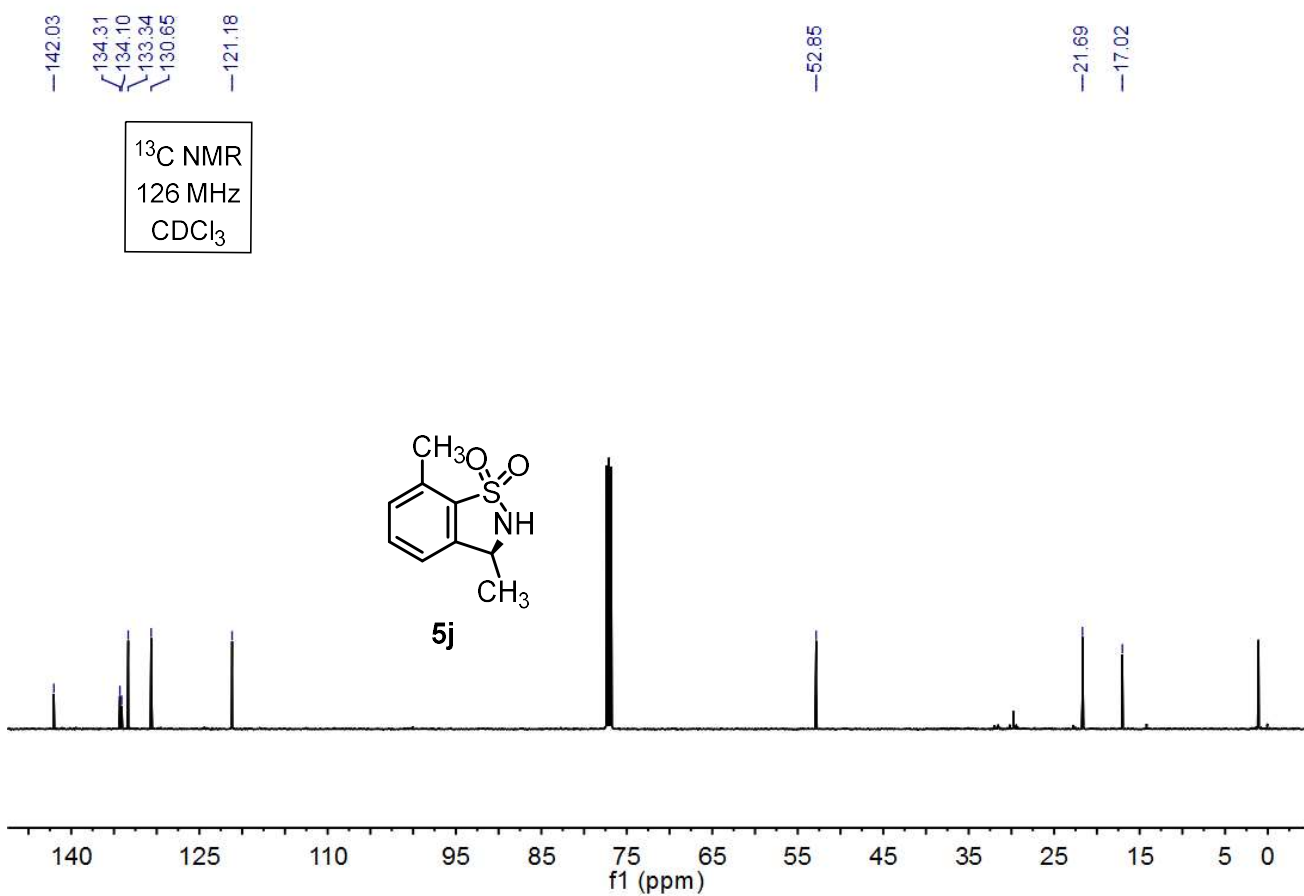

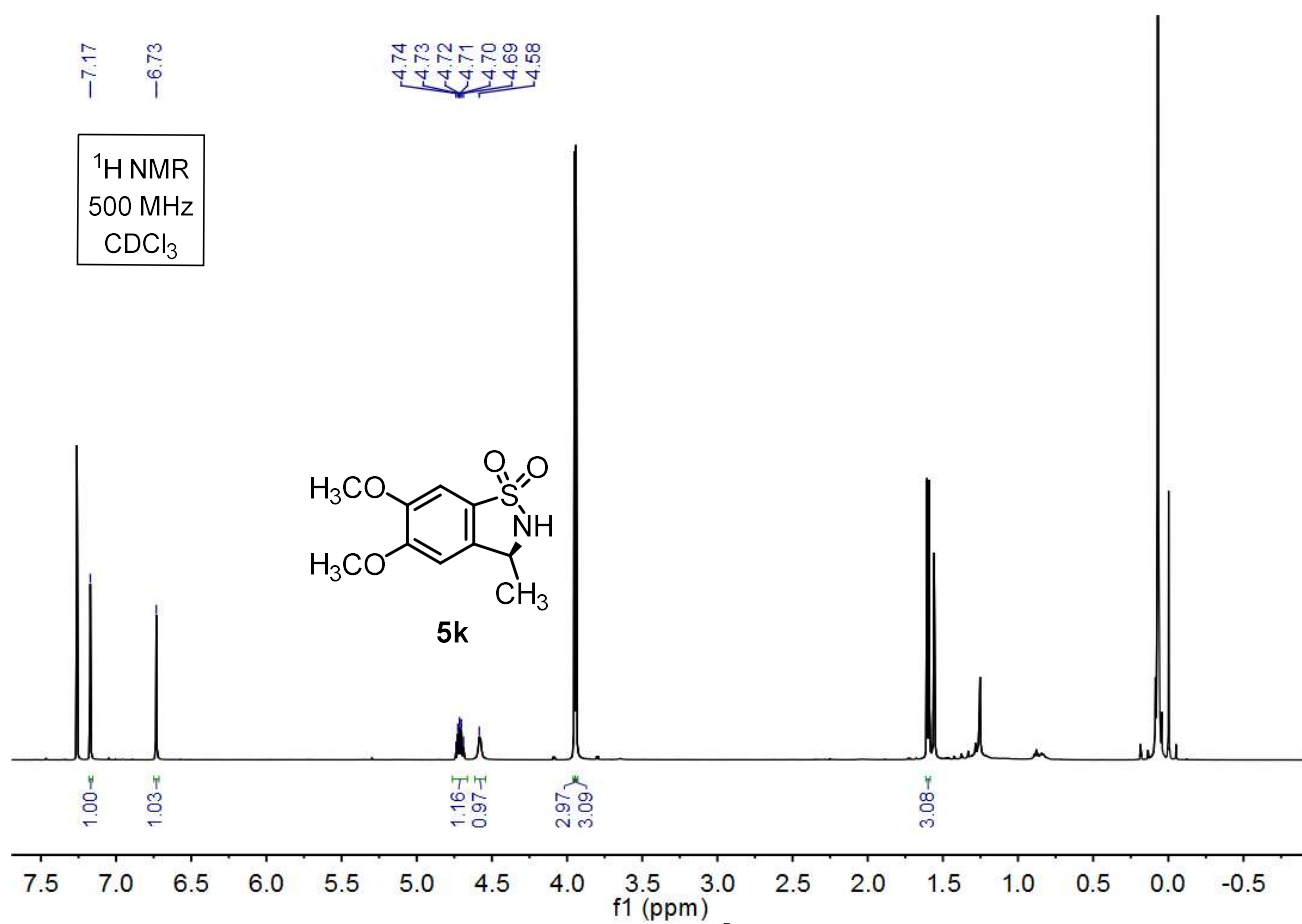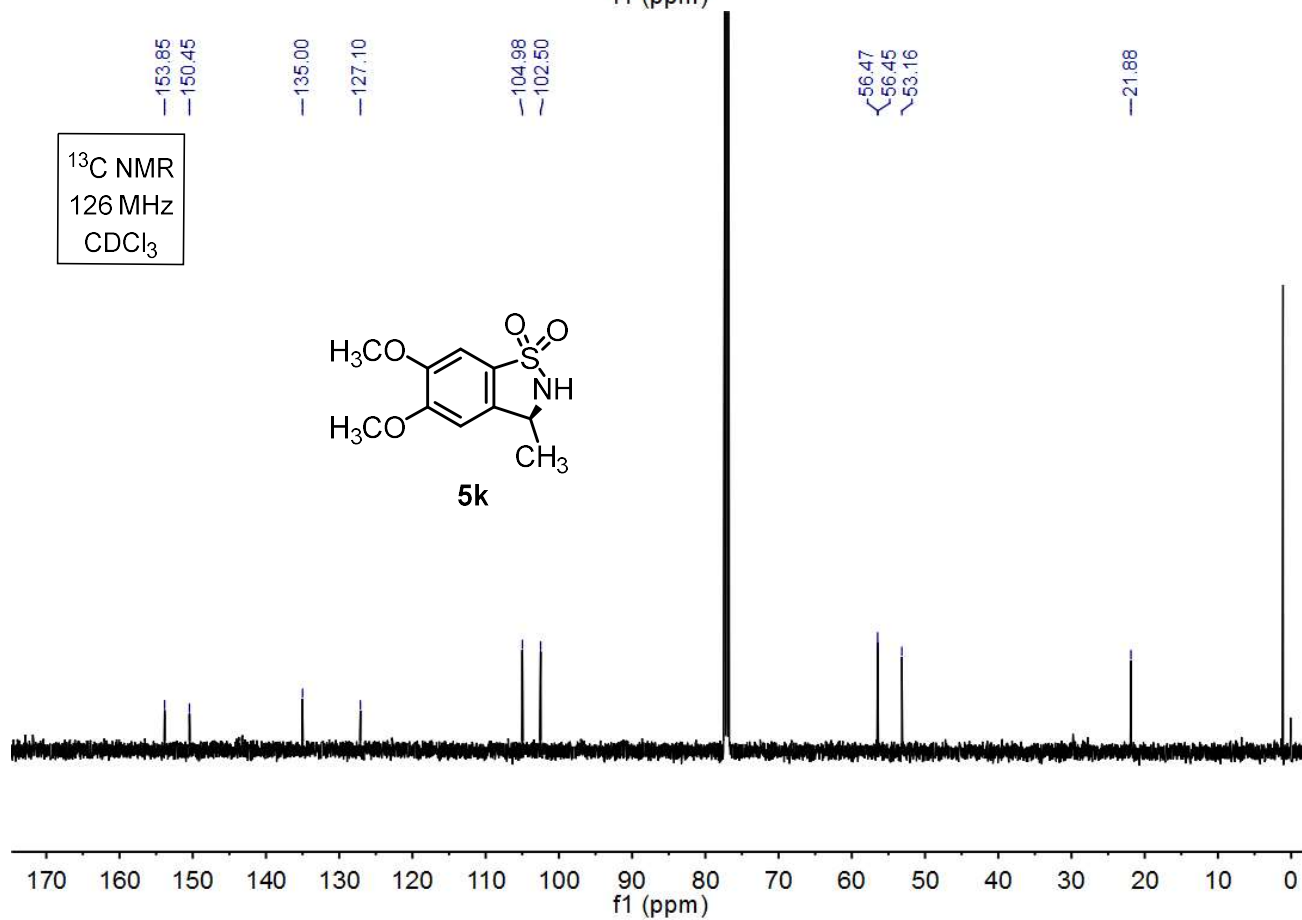

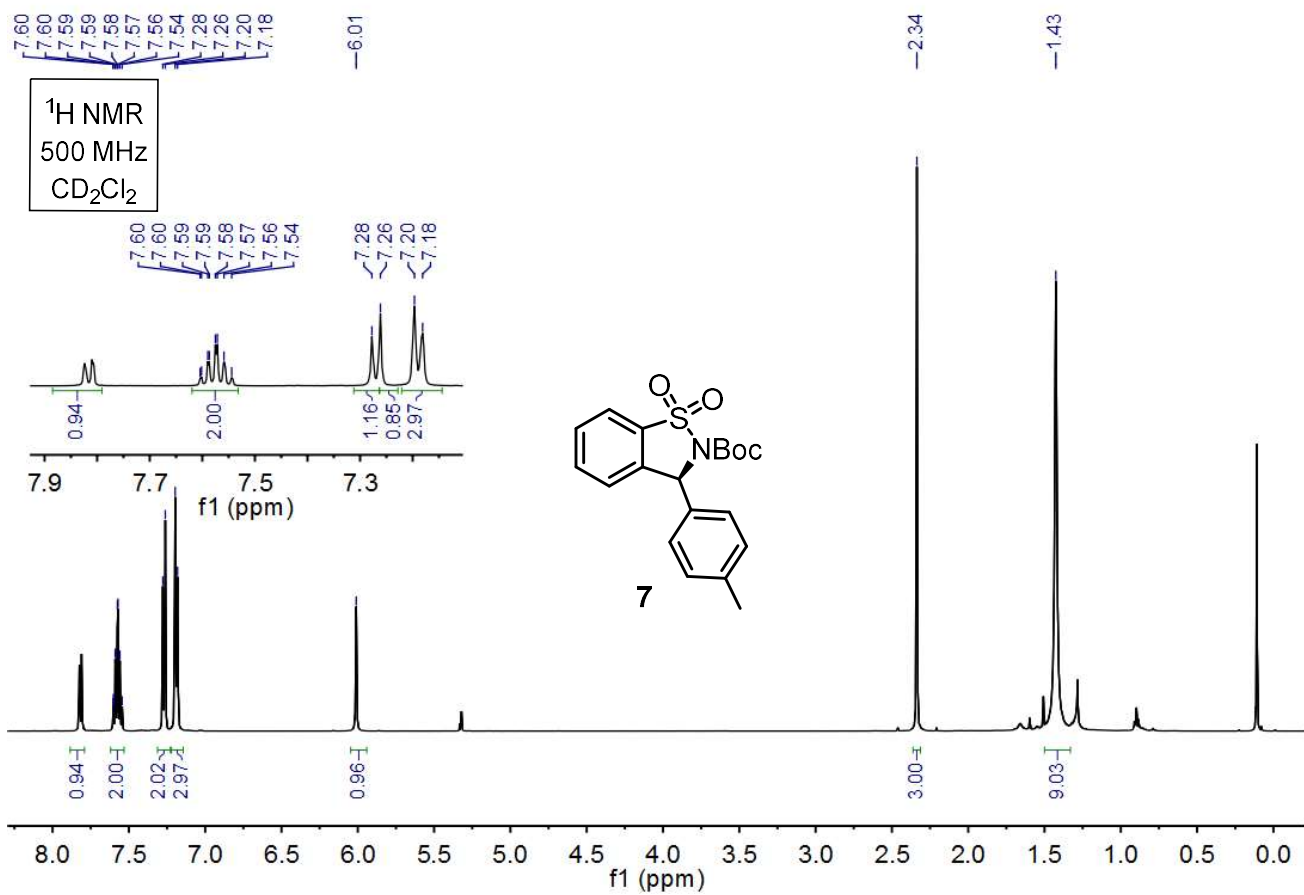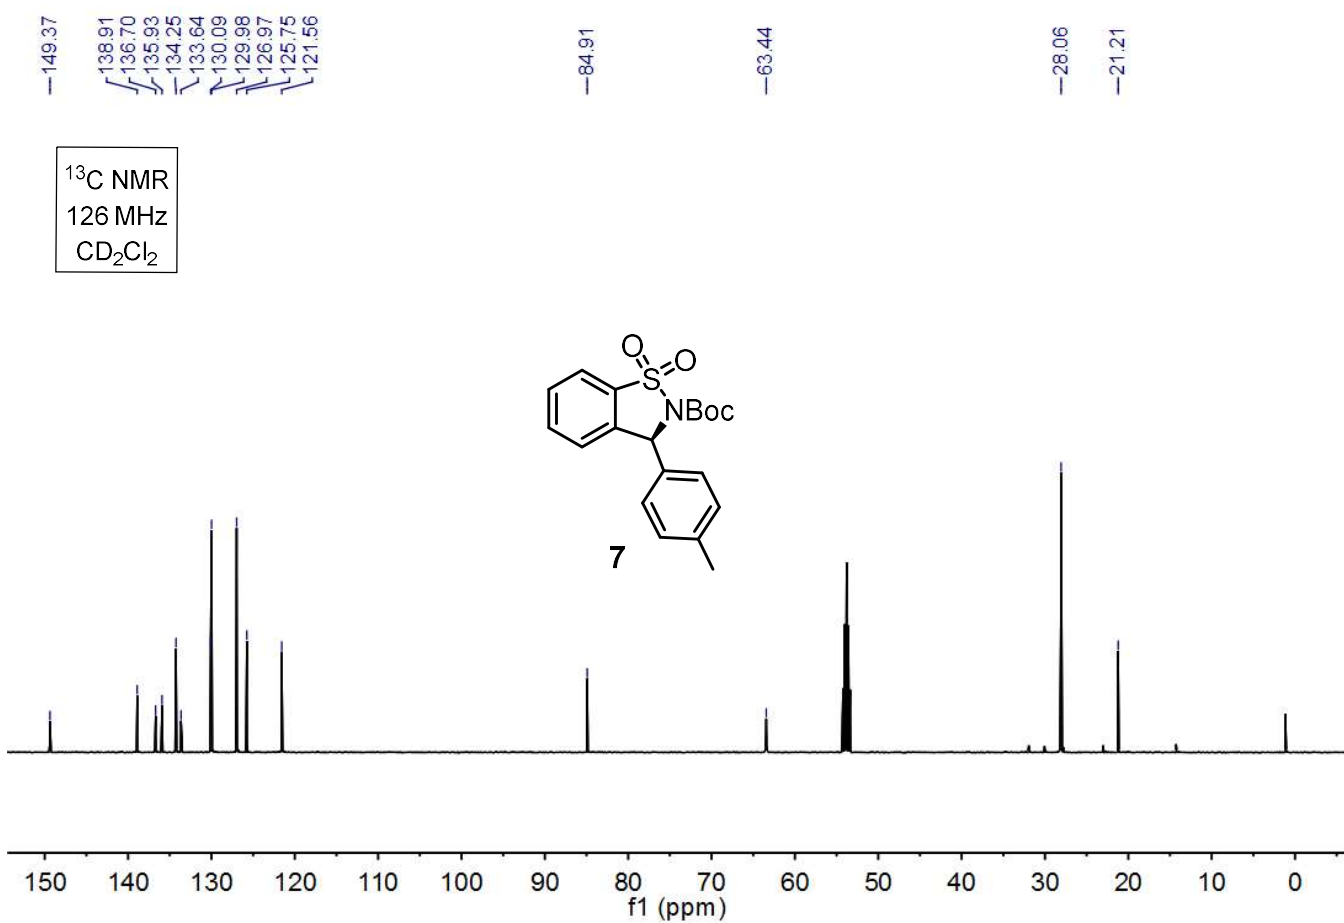



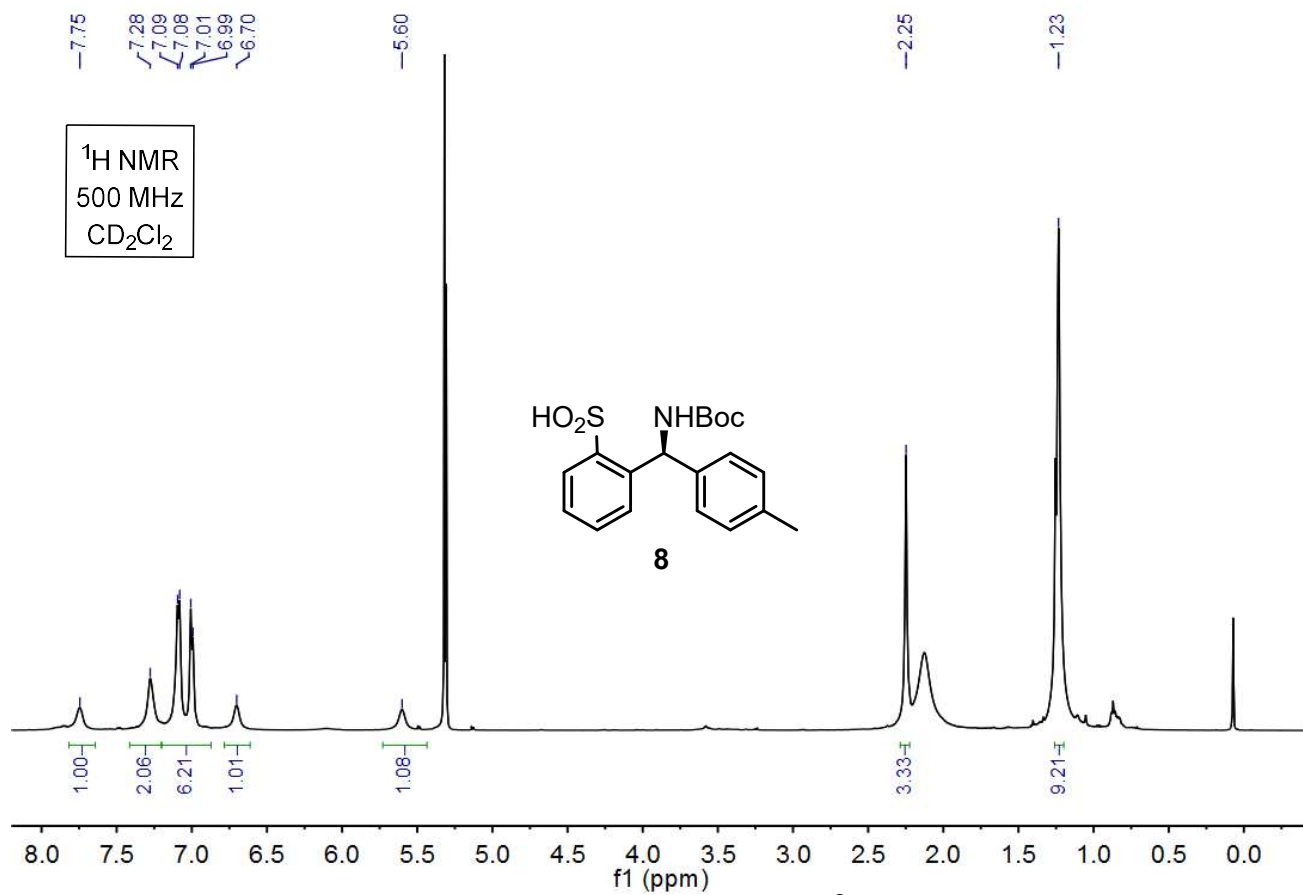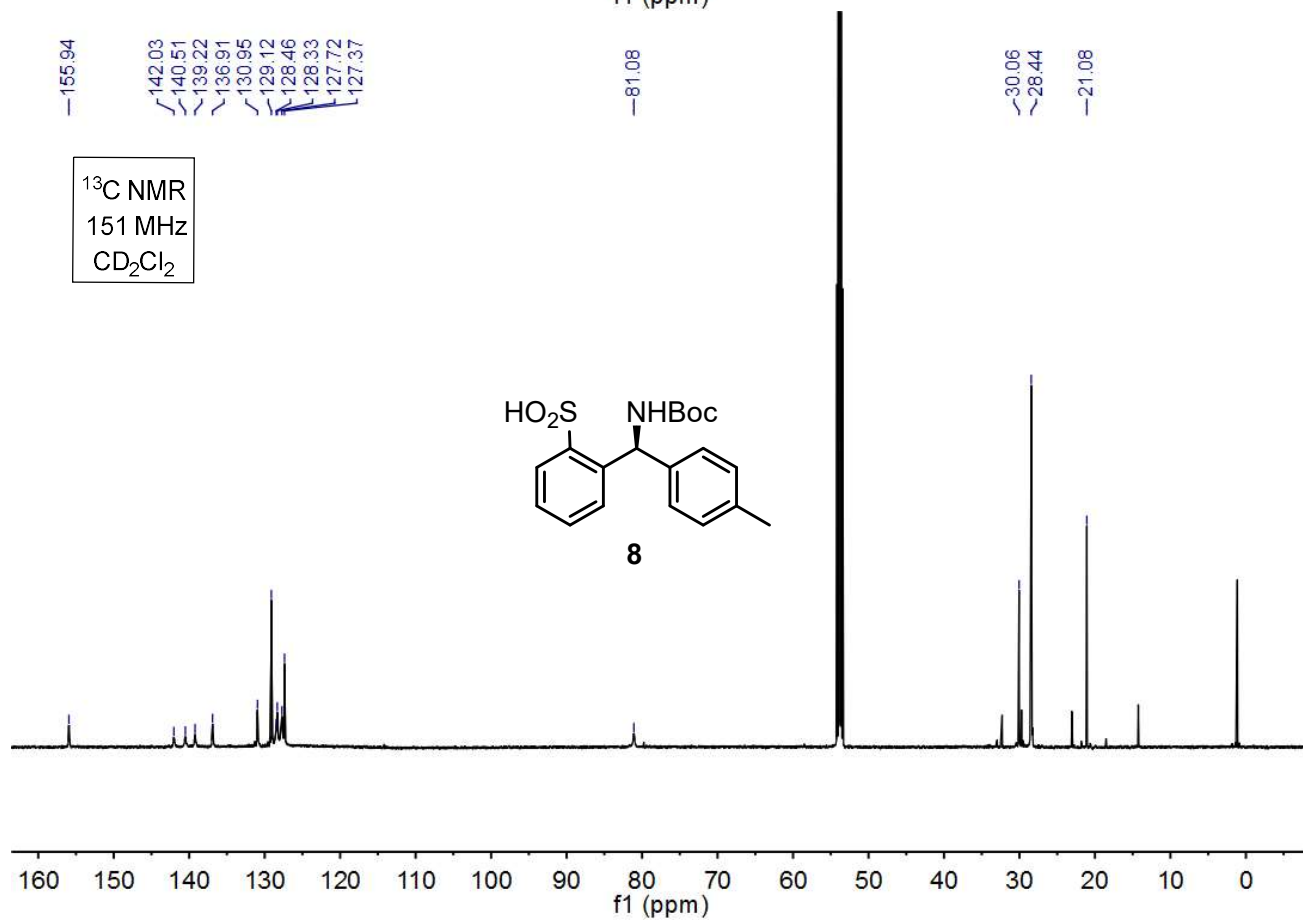

Supplement: c7cc04691j1.pdf [file c7cc04691j1.pdf]
